# Supplementary material
Source: PubMed Central journal article supplement (PMC5217783)

ALYLIANGTPELQNER  
Score: 257, 1.999.0375 m/z, 1000.526 m/z, -0.59187 ppm; MULTI-MS/MS

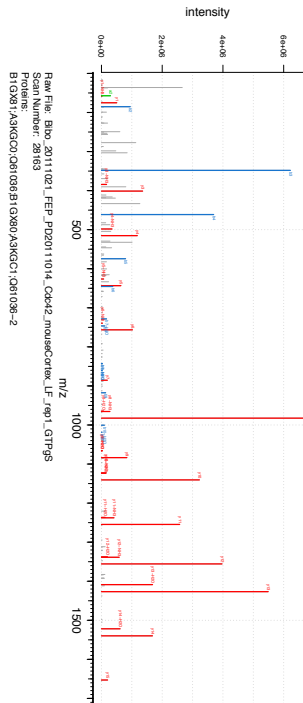

ALYLIANGTPELQNER  
Score: 257, 1.999.0375 m/z, 1000.526 m/z, -0.59187 ppm; MULTI-MS/MS

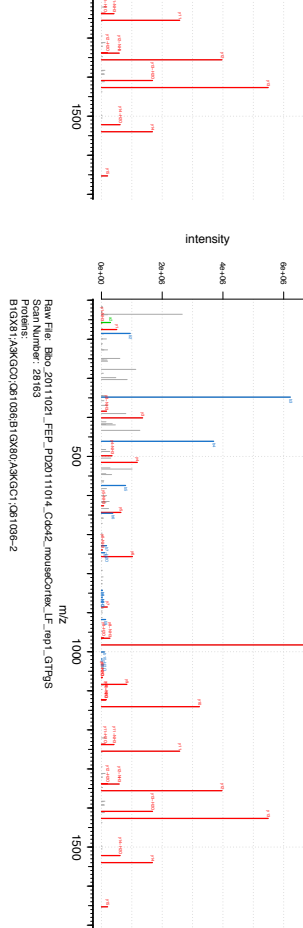

ALYLIANGTPELQNER  
Score: 257, 1.999.0375 m/z, 1000.526 m/z, -0.59187 ppm; MULTI-MS/MS

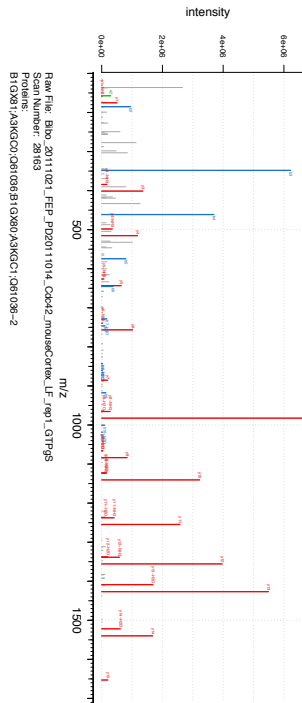

ALYLIANGTPELQNER  
Score: 257, 1.999.0375 m/z, 1000.526 m/z, -0.59187 ppm; MULTI-MS/MS

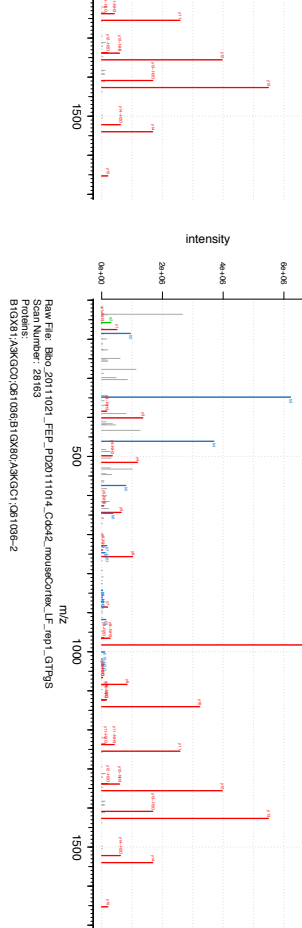

ALYLIANGTPELQNER  
Score: 257, 1.999.0375 m/z, 1000.526 m/z, -0.59187 ppm; MULTI-MS/MS

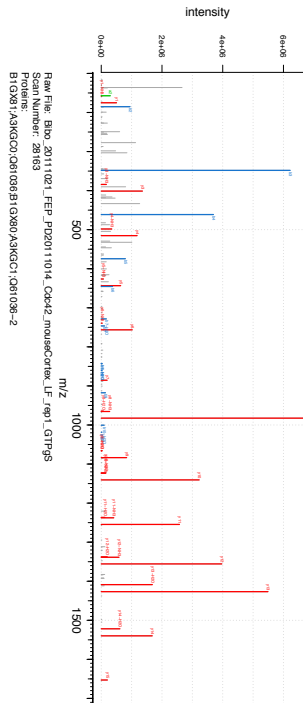

ALYLIANGTPELQNER  
Score: 257, 1.999.0375 m/z, 1000.526 m/z, -0.59187 ppm; MULTI-MS/MS

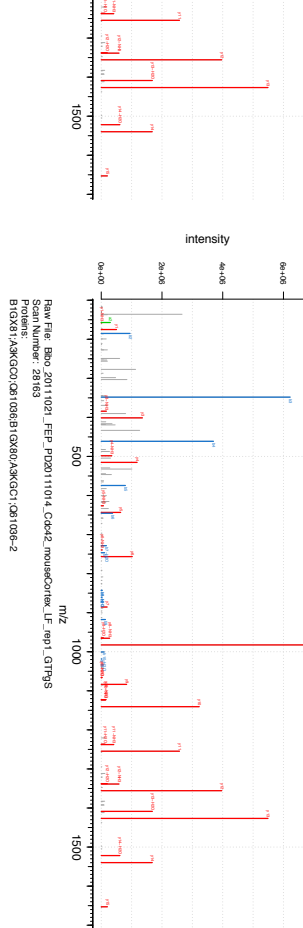

ALYLIANGTPELQNER  
Score: 257, 1.999.0375 m/z, 1000.526 m/z, -0.59187 ppm; MULTI-MS/MS

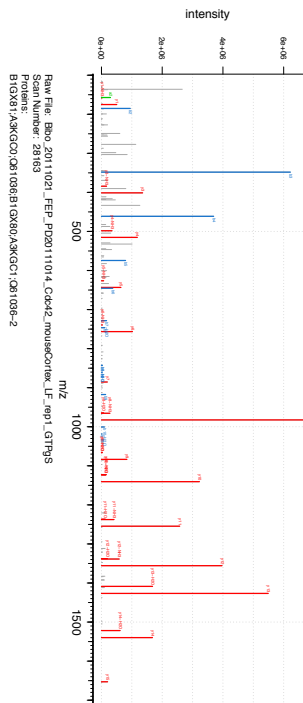

ALYLIANGTPELQNER  
Score: 257, 1.999.0375 m/z, 1000.526 m/z, -0.59187 ppm; MULTI-MS/MS

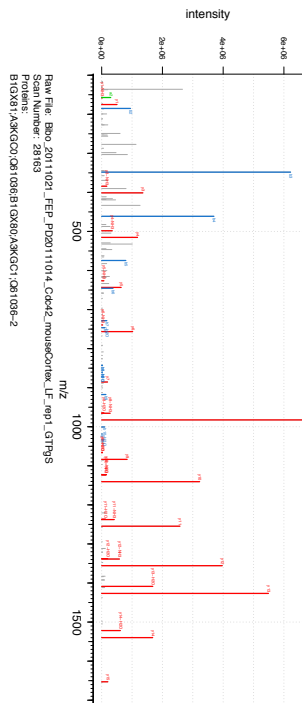

ALYLIANGTPELQNER  
Score: 257, 1.999.0375 m/z, 1000.526 m/z, -0.59187 ppm; MULTI-MS/MS

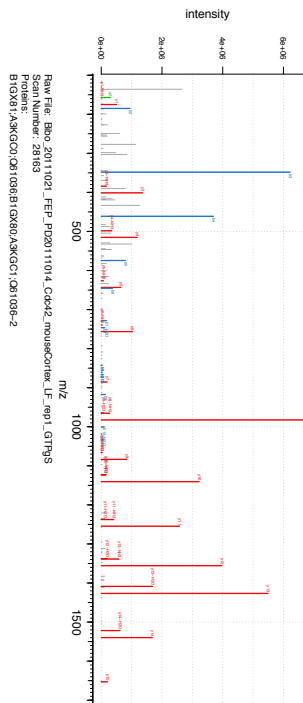

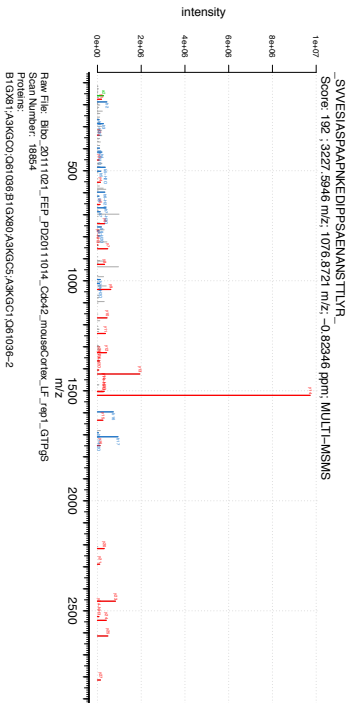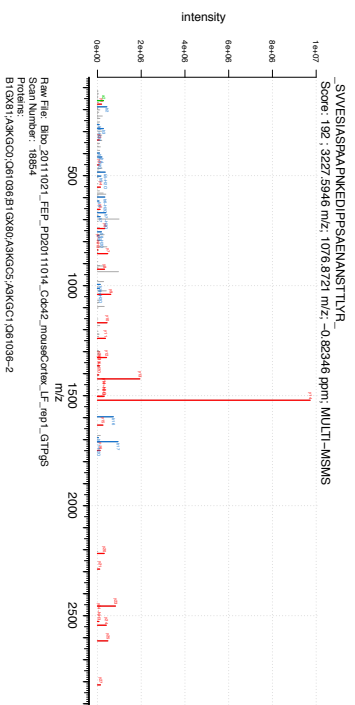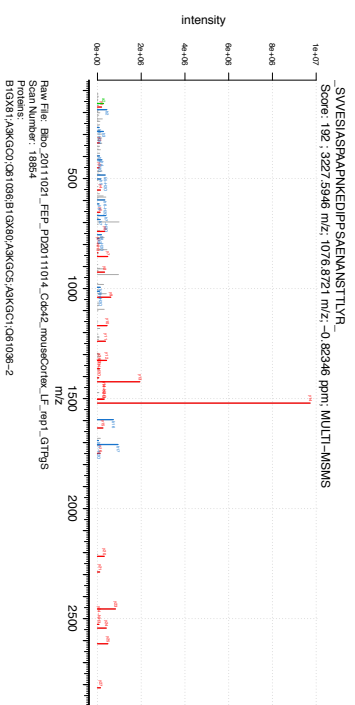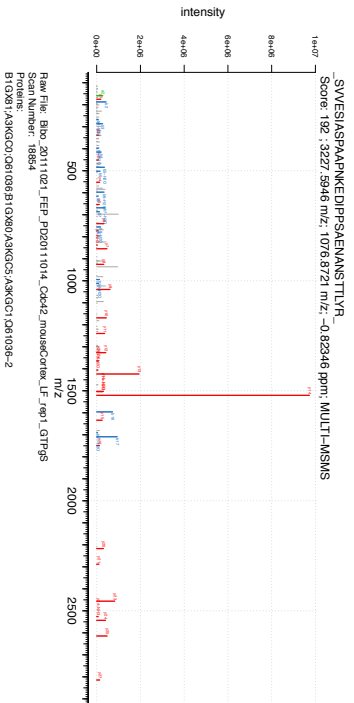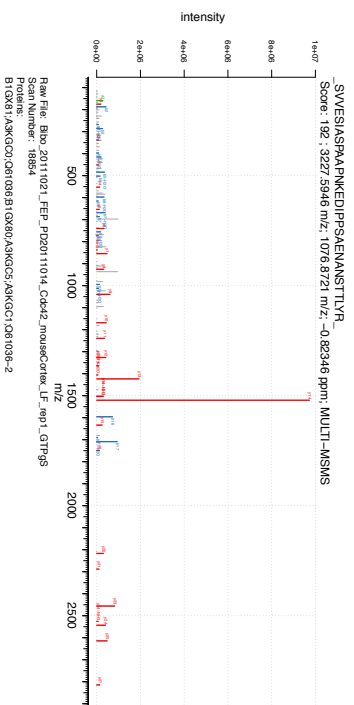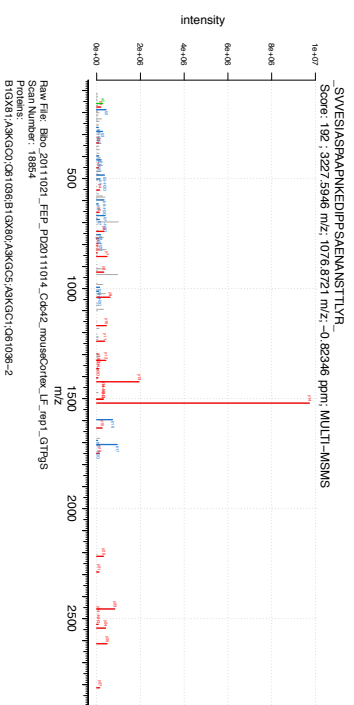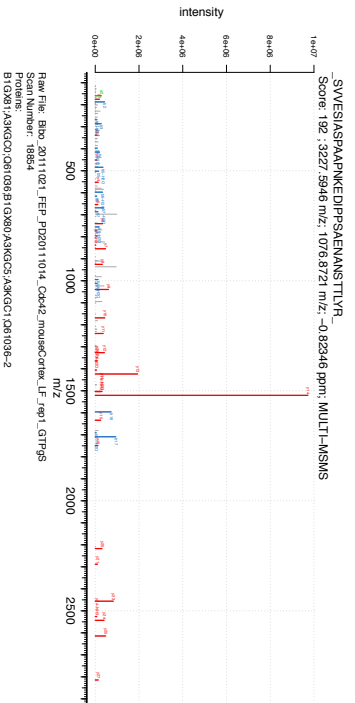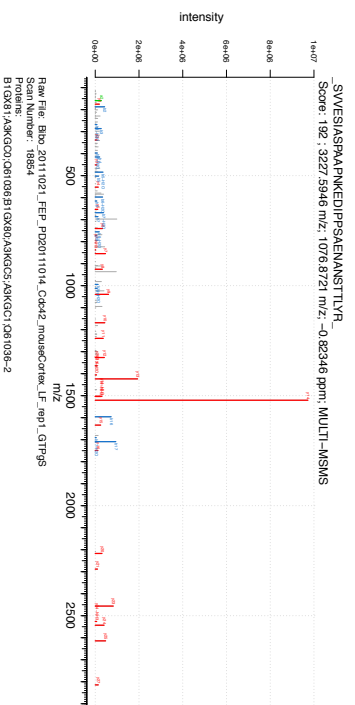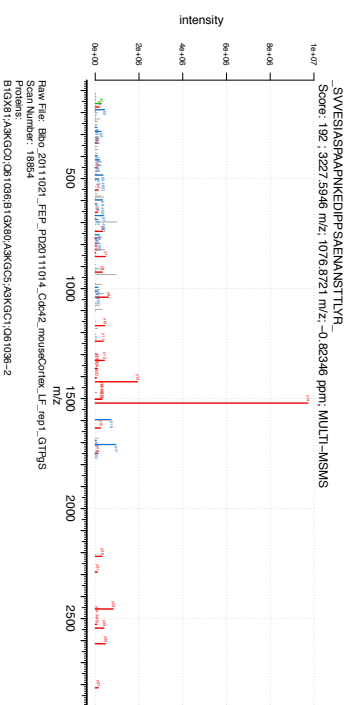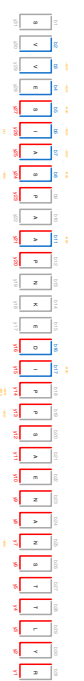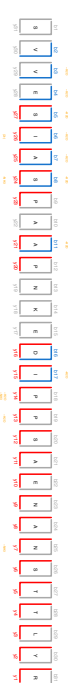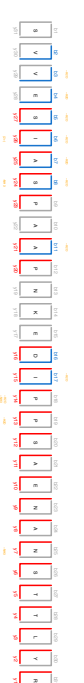

SIUOTVYALKOEI.RODK  
Score: 221 : 2462.2653 m/z; 821 : 7.6237 m/z; 1 : 1.067 ppm; MULTI-MSMS

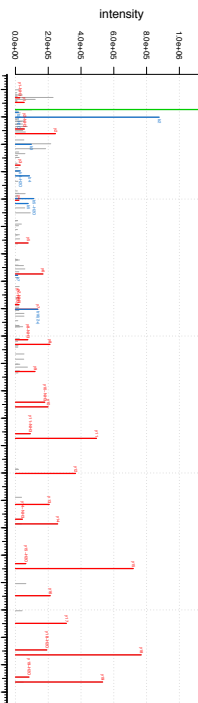

Raw File: Bto\_20111021\_FEP\_PD2011014\_Cckd2\_mouseCortex\_LF\_age2\_GTFgs  
Scan Number: 5250  
QIIES28-8:ID2VZ/QIIES28-2/QIIES28-4/QIIES28/QIIES28-7/QIIES28-3

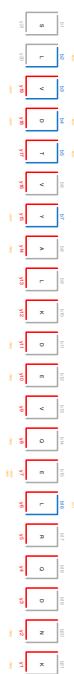

SIUOTVYALKOEI.RODK  
Score: 221 : 2462.2653 m/z; 821 : 7.6237 m/z; 1 : 1.067 ppm; MULTI-MSMS

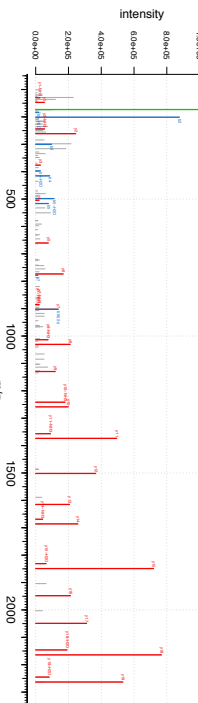

Raw File: Bto\_20111021\_FEP\_PD2011014\_Cckd2\_mouseCortex\_LF\_age2\_GTFgs  
Scan Number: 5250  
QIIES28-8:ID2VZ/QIIES28-2/QIIES28-4/QIIES28/QIIES28-7/QIIES28-3

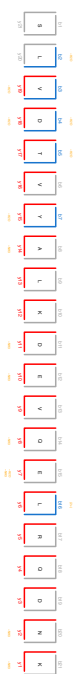

SIUOTVYALKOEI.RODK  
Score: 221 : 2462.2653 m/z; 821 : 7.6237 m/z; 1 : 1.067 ppm; MULTI-MSMS

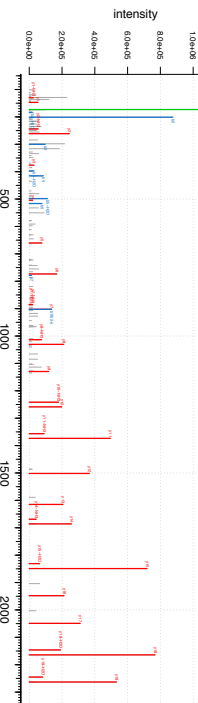

Raw File: Bto\_20111021\_FEP\_PD2011014\_Cckd2\_mouseCortex\_LF\_age2\_GTFgs  
Scan Number: 5250  
QIIES28-8:ID2VZ/QIIES28-2/QIIES28-4/QIIES28/QIIES28-7/QIIES28-3

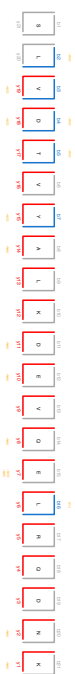

SIUOTVYALKOEI.RODK  
Score: 221 : 2462.2653 m/z; 821 : 7.6237 m/z; 1 : 1.067 ppm; MULTI-MSMS

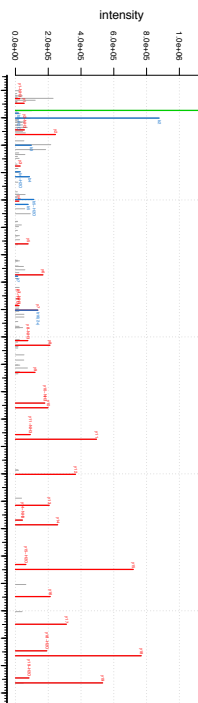

Raw File: Bto\_20111021\_FEP\_PD2011014\_Cckd2\_mouseCortex\_LF\_age2\_GTFgs  
Scan Number: 5250  
QIIES28-8:ID2VZ/QIIES28-2/QIIES28-4/QIIES28/QIIES28-7/QIIES28-3

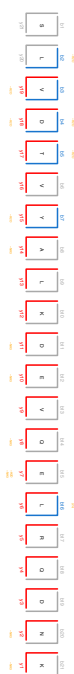

SIUOTVYALKOEI.RODK  
Score: 221 : 2462.2653 m/z; 821 : 7.6237 m/z; 1 : 1.067 ppm; MULTI-MSMS

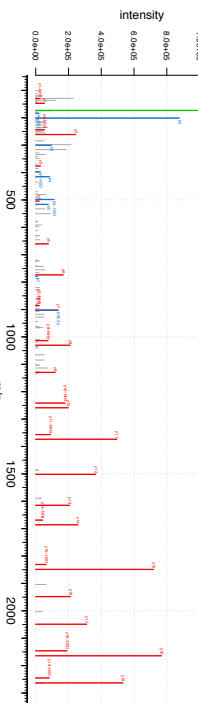

Raw File: Bto\_20111021\_FEP\_PD2011014\_Cckd2\_mouseCortex\_LF\_age2\_GTFgs  
Scan Number: 5250  
QIIES28-8:ID2VZ/QIIES28-2/QIIES28-4/QIIES28/QIIES28-7/QIIES28-3

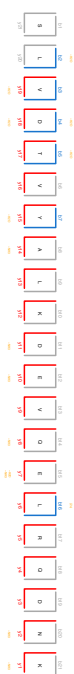

SIUOTVYALKOEI.RODK  
Score: 221 : 2462.2653 m/z; 821 : 7.6237 m/z; 1 : 1.067 ppm; MULTI-MSMS

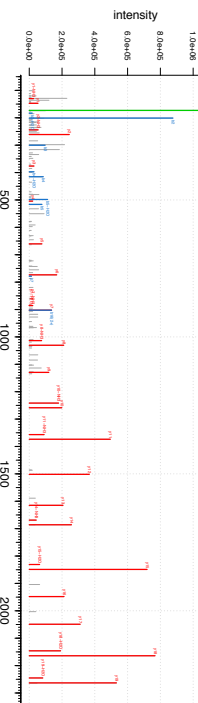

Raw File: Bto\_20111021\_FEP\_PD2011014\_Cckd2\_mouseCortex\_LF\_age2\_GTFgs  
Scan Number: 5250  
QIIES28-8:ID2VZ/QIIES28-2/QIIES28-4/QIIES28/QIIES28-7/QIIES28-3

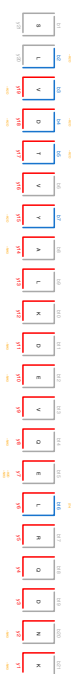

SIUOTVYALKOEI.RODK  
Score: 221 : 2462.2653 m/z; 821 : 7.6237 m/z; 1 : 1.067 ppm; MULTI-MSMS

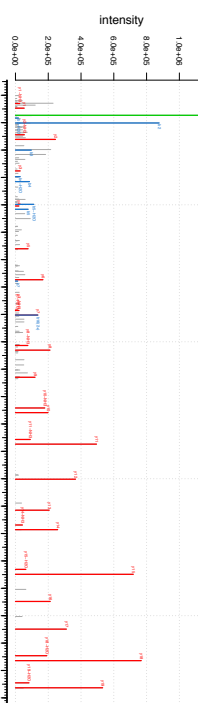

Raw File: Bto\_20111021\_FEP\_PD2011014\_Cckd2\_mouseCortex\_LF\_age2\_GTFgs  
Scan Number: 5250  
QIIES28-8:ID2VZ/QIIES28-2/QIIES28-4/QIIES28/QIIES28-7/QIIES28-3

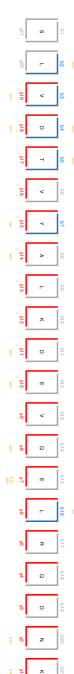

SIUOTVYALKOEI.RODK  
Score: 221 : 2462.2653 m/z; 821 : 7.6237 m/z; 1 : 1.067 ppm; MULTI-MSMS

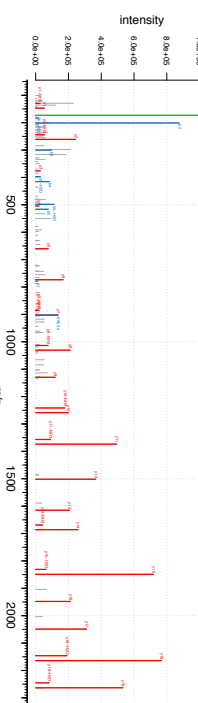

Raw File: Bto\_20111021\_FEP\_PD2011014\_Cckd2\_mouseCortex\_LF\_age2\_GTFgs  
Scan Number: 5250  
QIIES28-8:ID2VZ/QIIES28-2/QIIES28-4/QIIES28/QIIES28-7/QIIES28-3

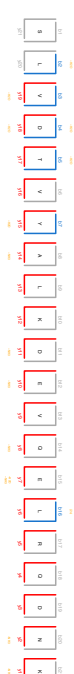

SIUOTVYALKOEI.RODK  
Score: 221 : 2462.2653 m/z; 821 : 7.6237 m/z; 1 : 1.067 ppm; MULTI-MSMS

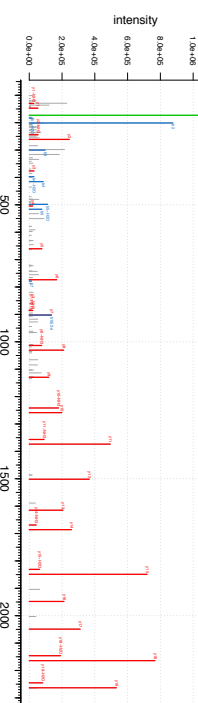

Raw File: Bto\_20111021\_FEP\_PD2011014\_Cckd2\_mouseCortex\_LF\_age2\_GTFgs  
Scan Number: 5250  
QIIES28-8:ID2VZ/QIIES28-2/QIIES28-4/QIIES28/QIIES28-7/QIIES28-3

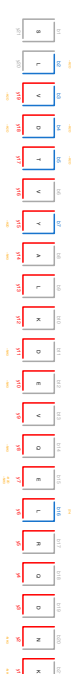

SYNVAVLQNLLETHEYSK  
Score: 290, 2328, 1274 m/z: 1165.071 m/z: -0.089837 ppm; MULTI-MS/MS

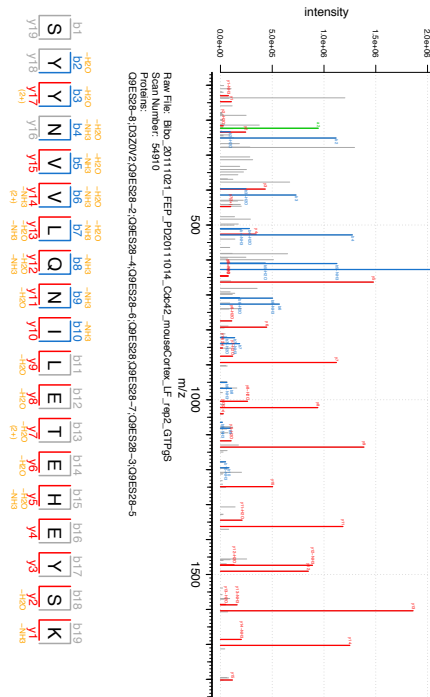

Raw File: Bto\_20111021\_FEP\_PD2011014\_C6k42\_mouseCortex\_LF\_age2\_GTFPS  
Scan Number: 54910  
QIESS28-8:ID2VZQIES28-2:QIES28-4:QIES28-6:QIES28:QIES28-7:QIES28-3:QIES28-5

SYNVAVLQNLLETHEYSK  
Score: 290, 2328, 1274 m/z: 1165.071 m/z: -0.089837 ppm; MULTI-MS/MS

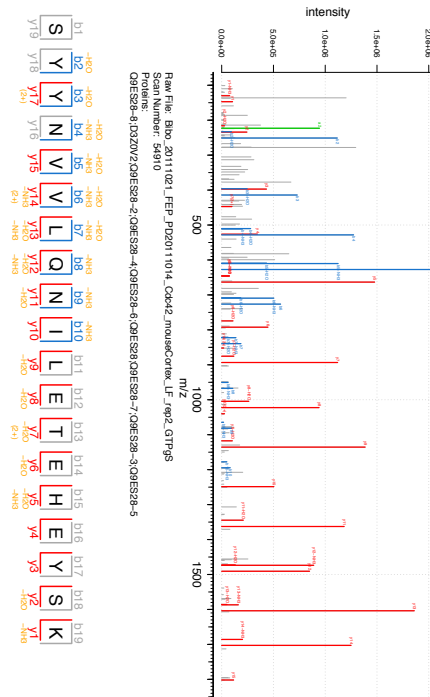

Raw File: Bto\_20111021\_FEP\_PD2011014\_C6k42\_mouseCortex\_LF\_age2\_GTFPS  
Scan Number: 54910  
QIESS28-8:ID2VZQIES28-2:QIES28-4:QIES28-6:QIES28:QIES28-7:QIES28-3:QIES28-5

SYNVAVLQNLLETHEYSK  
Score: 290, 2328, 1274 m/z: 1165.071 m/z: -0.089837 ppm; MULTI-MS/MS

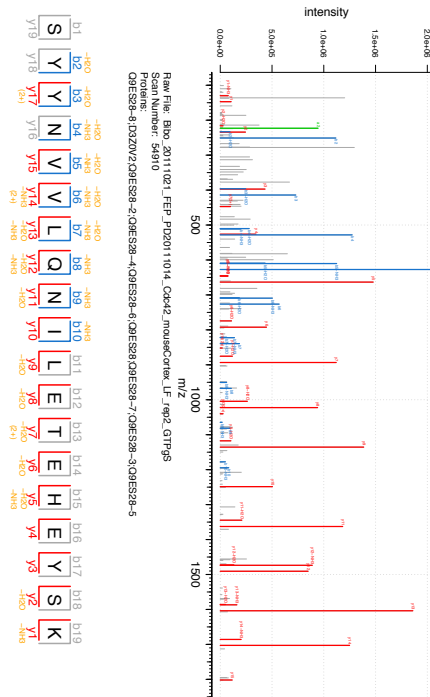

Raw File: Bto\_20111021\_FEP\_PD2011014\_C6k42\_mouseCortex\_LF\_age2\_GTFPS  
Scan Number: 54910  
QIESS28-8:ID2VZQIES28-2:QIES28-4:QIES28-6:QIES28:QIES28-7:QIES28-3:QIES28-5

SYNVAVLQNLLETHEYSK  
Score: 290, 2328, 1274 m/z: 1165.071 m/z: -0.089837 ppm; MULTI-MS/MS

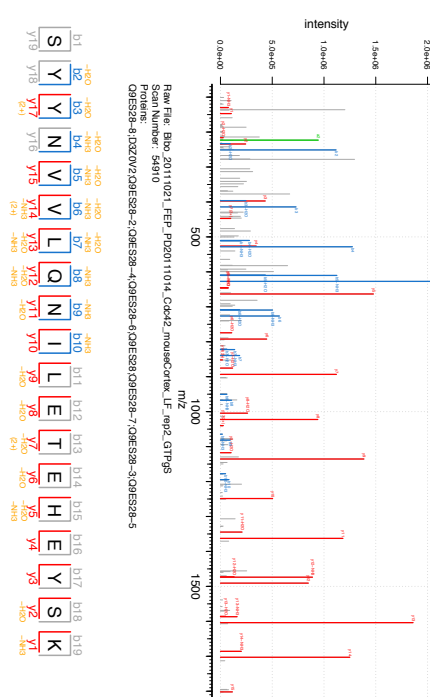

Raw File: Bto\_20111021\_FEP\_PD2011014\_C6k42\_mouseCortex\_LF\_age2\_GTFPS  
Scan Number: 54910  
QIESS28-8:ID2VZQIES28-2:QIES28-4:QIES28-6:QIES28:QIES28-7:QIES28-3:QIES28-5

SYNVAVLQNLLETHEYSK  
Score: 290, 2328, 1274 m/z: 1165.071 m/z: -0.089837 ppm; MULTI-MS/MS

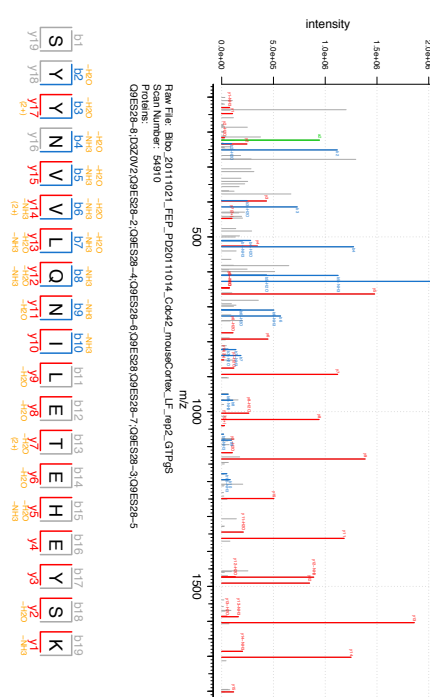

Raw File: Bto\_20111021\_FEP\_PD2011014\_C6k42\_mouseCortex\_LF\_age2\_GTFPS  
Scan Number: 54910  
QIESS28-8:ID2VZQIES28-2:QIES28-4:QIES28-6:QIES28:QIES28-7:QIES28-3:QIES28-5

SYNVAVLQNLLETHEYSK  
Score: 290, 2328, 1274 m/z: 1165.071 m/z: -0.089837 ppm; MULTI-MS/MS

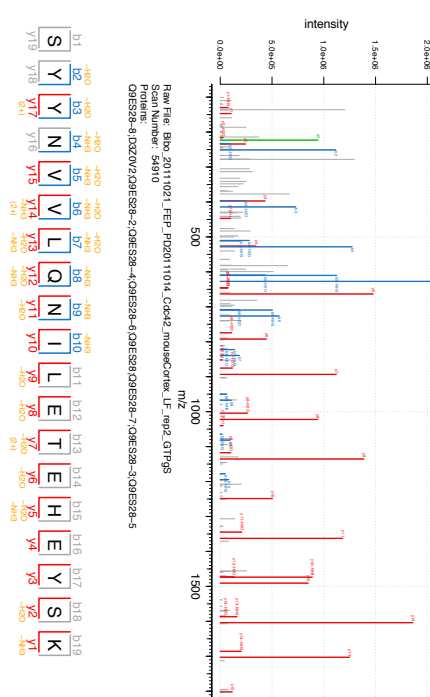

Raw File: Bto\_20111021\_FEP\_PD2011014\_C6k42\_mouseCortex\_LF\_age2\_GTFPS  
Scan Number: 54910  
QIESS28-8:ID2VZQIES28-2:QIES28-4:QIES28-6:QIES28:QIES28-7:QIES28-3:QIES28-5

SYNVAVLQNLLETHEYSK  
Score: 290, 2328, 1274 m/z: 1165.071 m/z: -0.089837 ppm; MULTI-MS/MS

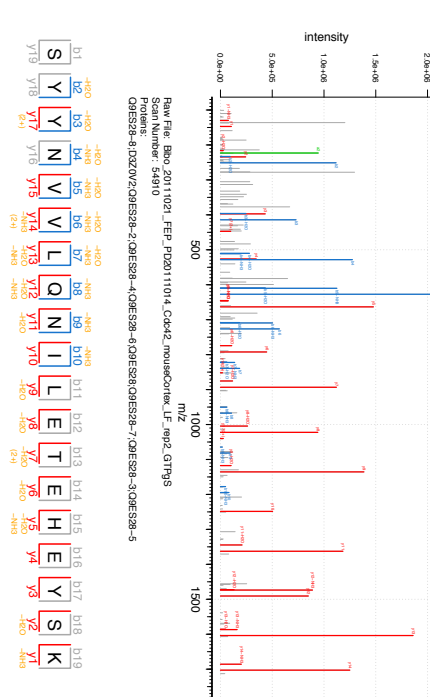

Raw File: Bto\_20111021\_FEP\_PD2011014\_C6k42\_mouseCortex\_LF\_age2\_GTFPS  
Scan Number: 54910  
QIESS28-8:ID2VZQIES28-2:QIES28-4:QIES28-6:QIES28:QIES28-7:QIES28-3:QIES28-5

SYNVAVLQNLLETHEYSK  
Score: 290, 2328, 1274 m/z: 1165.071 m/z: -0.089837 ppm; MULTI-MS/MS

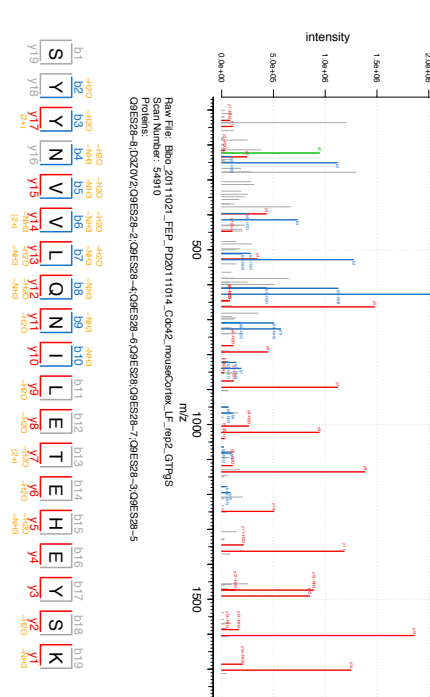

Raw File: Bto\_20111021\_FEP\_PD2011014\_C6k42\_mouseCortex\_LF\_age2\_GTFPS  
Scan Number: 54910  
QIESS28-8:ID2VZQIES28-2:QIES28-4:QIES28-6:QIES28:QIES28-7:QIES28-3:QIES28-5

SYNVAVLQNLLETHEYSK  
Score: 290, 2328, 1274 m/z: 1165.071 m/z: -0.089837 ppm; MULTI-MS/MS

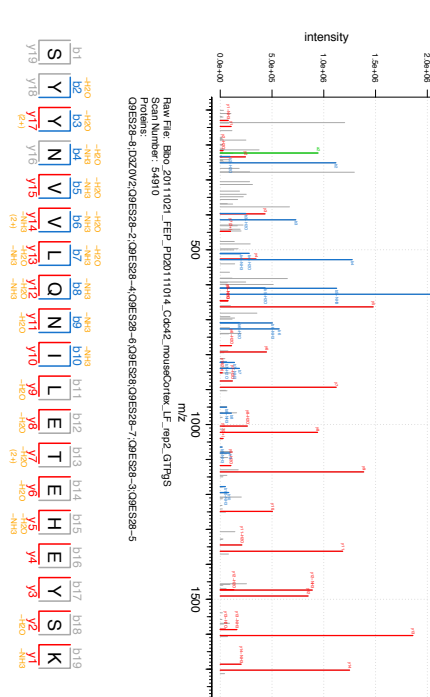

Raw File: Bto\_20111021\_FEP\_PD2011014\_C6k42\_mouseCortex\_LF\_age2\_GTFPS  
Scan Number: 54910  
QIESS28-8:ID2VZQIES28-2:QIES28-4:QIES28-6:QIES28:QIES28-7:QIES28-3:QIES28-5



VT\$SNP\$TKRHSVPSHTLPSHPITPSSK  
Score: 306 : 3031.6091 m/z: 1011.5436 m/z: -0.74235 ppm; MULTI-MSMS

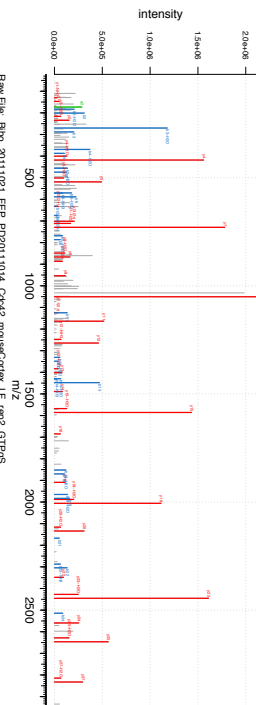

Raw File: Bto\_20111021\_FEP\_PD20111014\_C6d42\_mouseC6rxk\_LF\_e02\_GTF9S  
Scan Number: 7545  
QIE\$29: 8:QIE\$29: 2:QIE\$29: 4:QIE\$29: 6:QIE\$29: QIE\$29: 7:QIE\$29: 5

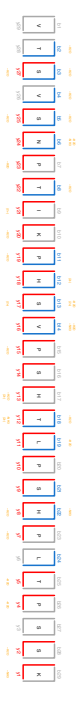

VT\$SNP\$TKRHSVPSHTLPSHPITPSSK  
Score: 306 : 3031.6091 m/z: 1011.5436 m/z: -0.74235 ppm; MULTI-MSMS

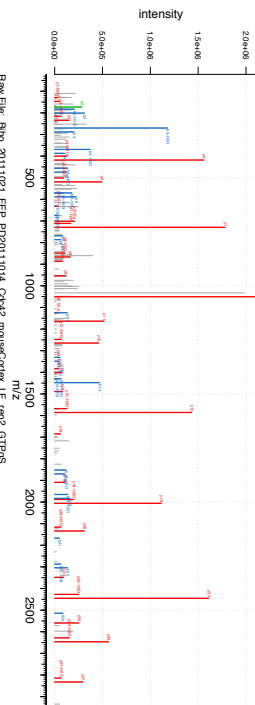

Raw File: Bto\_20111021\_FEP\_PD20111014\_C6d42\_mouseC6rxk\_LF\_e02\_GTF9S  
Scan Number: 7546  
QIE\$29: 8:QIE\$29: 2:QIE\$29: 4:QIE\$29: 6:QIE\$29: QIE\$29: 7:QIE\$29: 5

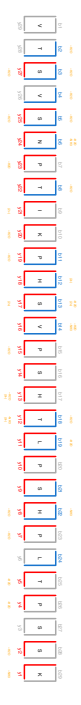

VT\$SNP\$TKRHSVPSHTLPSHPITPSSK  
Score: 306 : 3031.6091 m/z: 1011.5436 m/z: -0.74235 ppm; MULTI-MSMS

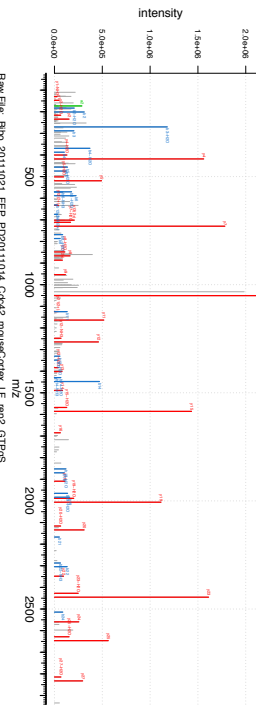

Raw File: Bto\_20111021\_FEP\_PD20111014\_C6d42\_mouseC6rxk\_LF\_e02\_GTF9S  
Scan Number: 7545  
QIE\$29: 8:QIE\$29: 2:QIE\$29: 4:QIE\$29: 6:QIE\$29: QIE\$29: 7:QIE\$29: 5

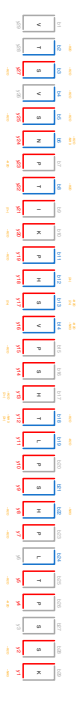

VT\$SNP\$TKRHSVPSHTLPSHPITPSSK  
Score: 306 : 3031.6091 m/z: 1011.5436 m/z: -0.74235 ppm; MULTI-MSMS

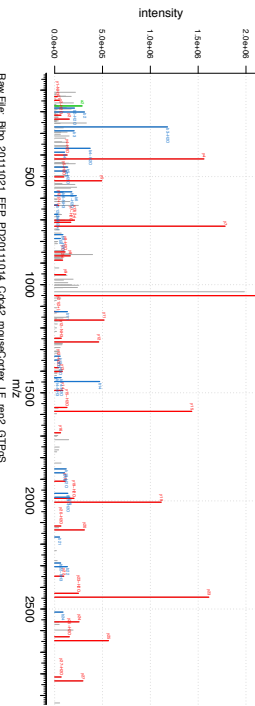

Raw File: Bto\_20111021\_FEP\_PD20111014\_C6d42\_mouseC6rxk\_LF\_e02\_GTF9S  
Scan Number: 7545  
QIE\$29: 8:QIE\$29: 2:QIE\$29: 4:QIE\$29: 6:QIE\$29: QIE\$29: 7:QIE\$29: 5

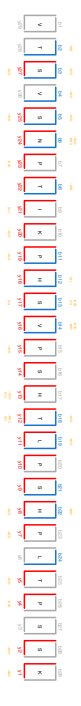

VT\$SNP\$TKRHSVPSHTLPSHPITPSSK  
Score: 306 : 3031.6091 m/z: 1011.5436 m/z: -0.74235 ppm; MULTI-MSMS

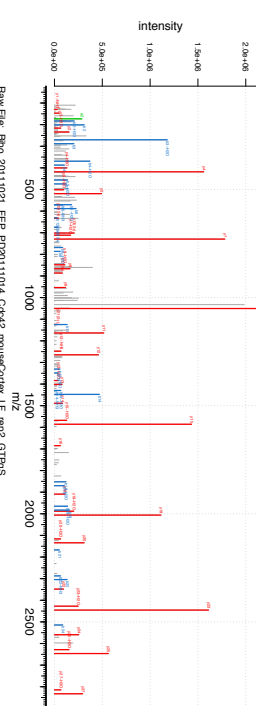

Raw File: Bto\_20111021\_FEP\_PD20111014\_C6d42\_mouseC6rxk\_LF\_e02\_GTF9S  
Scan Number: 7545  
QIE\$29: 8:QIE\$29: 2:QIE\$29: 4:QIE\$29: 6:QIE\$29: QIE\$29: 7:QIE\$29: 5

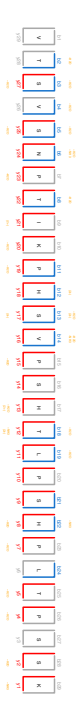

VT\$SNP\$TKRHSVPSHTLPSHPITPSSK  
Score: 306 : 3031.6091 m/z: 1011.5436 m/z: -0.74235 ppm; MULTI-MSMS

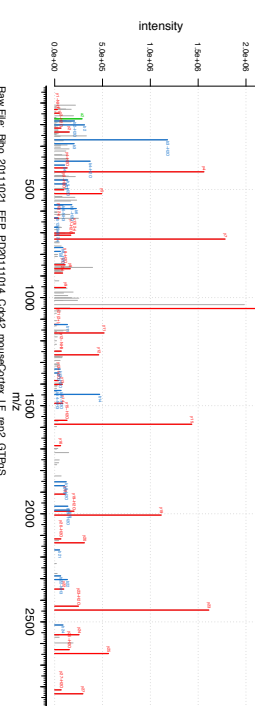

Raw File: Bto\_20111021\_FEP\_PD20111014\_C6d42\_mouseC6rxk\_LF\_e02\_GTF9S  
Scan Number: 7545  
QIE\$29: 8:QIE\$29: 2:QIE\$29: 4:QIE\$29: 6:QIE\$29: QIE\$29: 7:QIE\$29: 5

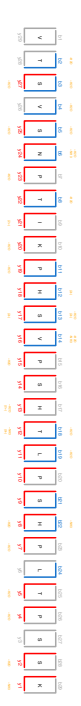

VT\$SNP\$TKRHSVPSHTLPSHPITPSSK  
Score: 306 : 3031.6091 m/z: 1011.5436 m/z: -0.74235 ppm; MULTI-MSMS

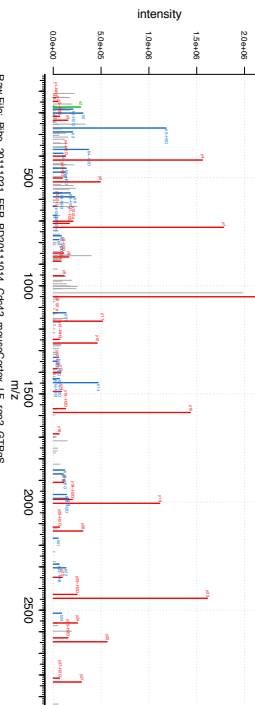

Raw File: Bto\_20111021\_FEP\_PD20111014\_C6d42\_mouseC6rxk\_LF\_e02\_GTF9S  
Scan Number: 7545  
QIE\$29: 8:QIE\$29: 2:QIE\$29: 4:QIE\$29: 6:QIE\$29: QIE\$29: 7:QIE\$29: 5

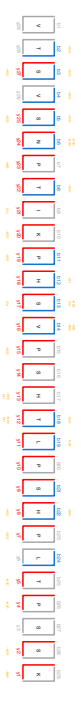

VT\$SNP\$TKRHSVPSHTLPSHPITPSSK  
Score: 306 : 3031.6091 m/z: 1011.5436 m/z: -0.74235 ppm; MULTI-MSMS

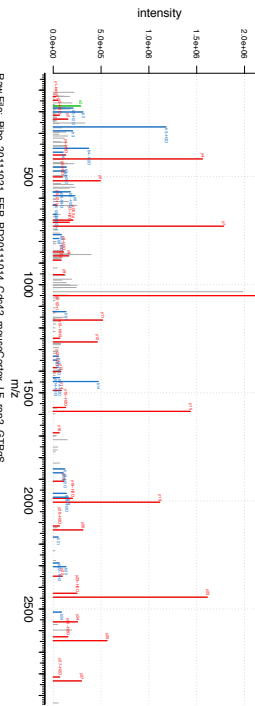

Raw File: Bto\_20111021\_FEP\_PD20111014\_C6d42\_mouseC6rxk\_LF\_e02\_GTF9S  
Scan Number: 7545  
QIE\$29: 8:QIE\$29: 2:QIE\$29: 4:QIE\$29: 6:QIE\$29: QIE\$29: 7:QIE\$29: 5

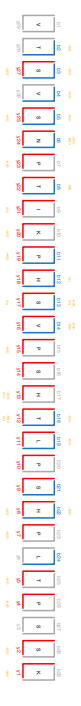

VT\$SNP\$TKRHSVPSHTLPSHPITPSSK  
Score: 306 : 3031.6091 m/z: 1011.5436 m/z: -0.74235 ppm; MULTI-MSMS

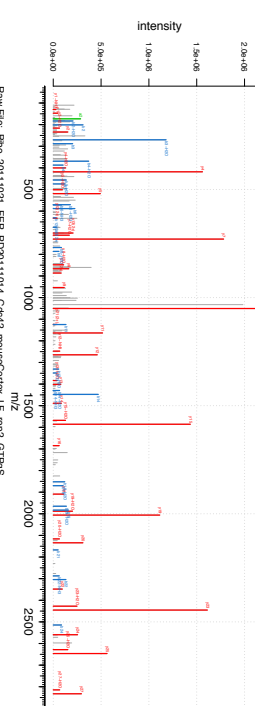

Raw File: Bto\_20111021\_FEP\_PD20111014\_C6d42\_mouseC6rxk\_LF\_e02\_GTF9S  
Scan Number: 7545  
QIE\$29: 8:QIE\$29: 2:QIE\$29: 4:QIE\$29: 6:QIE\$29: QIE\$29: 7:QIE\$29: 5

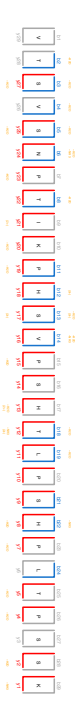

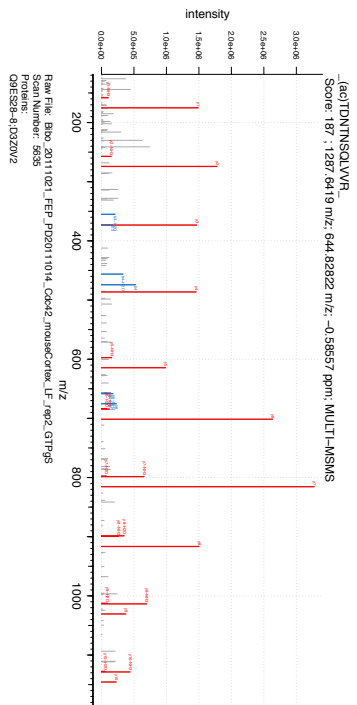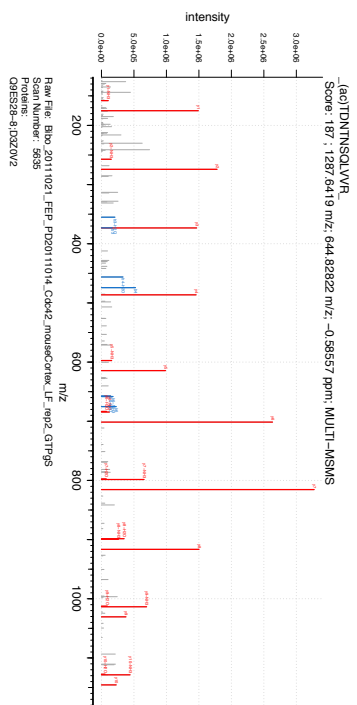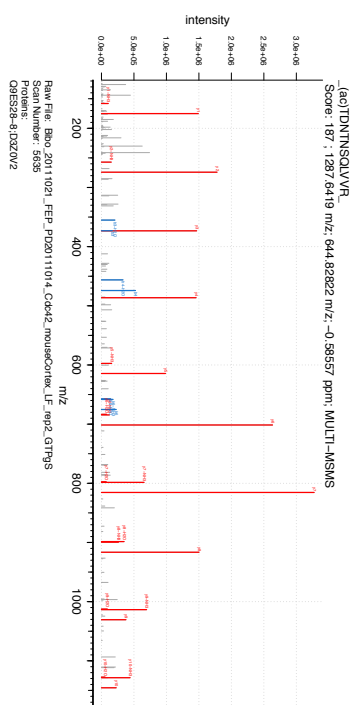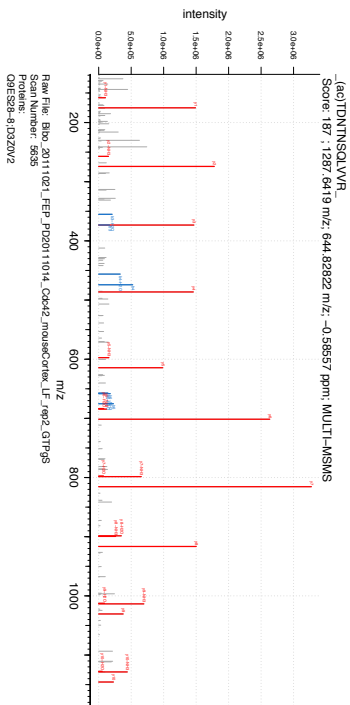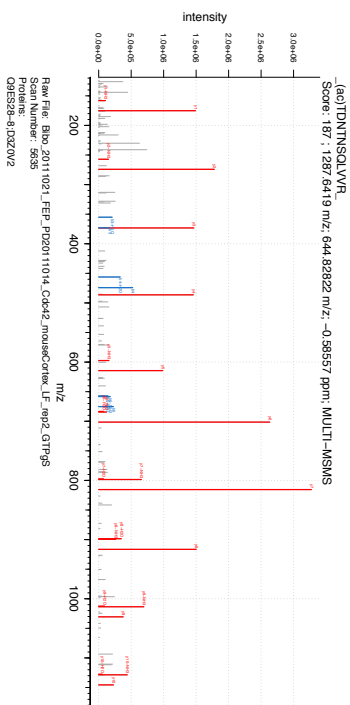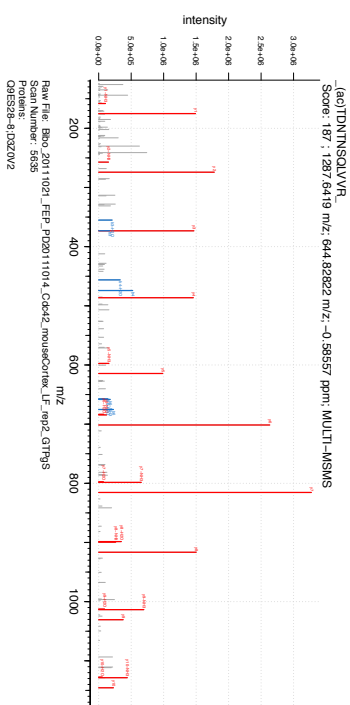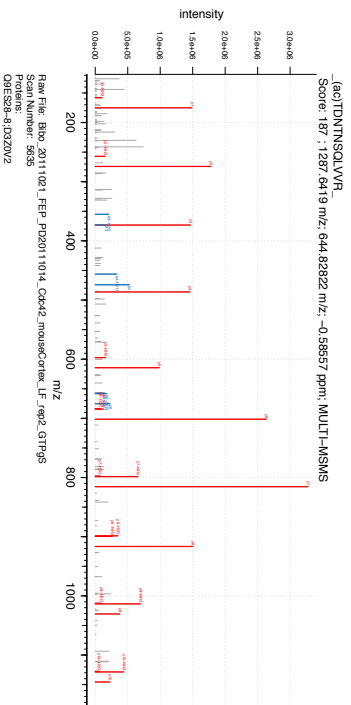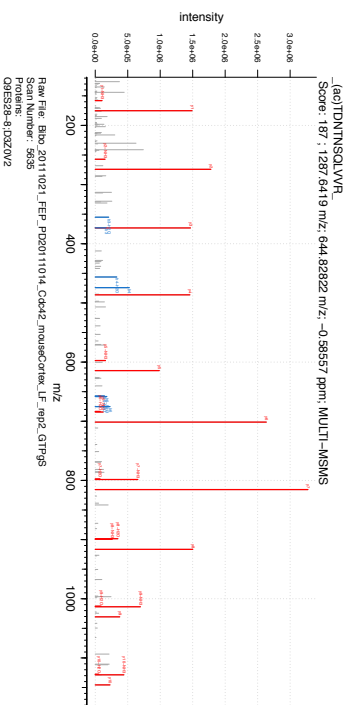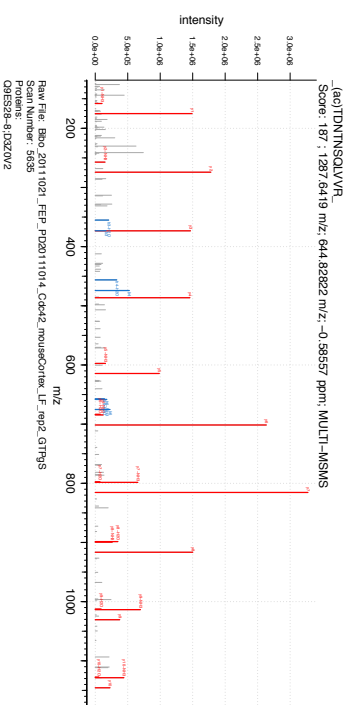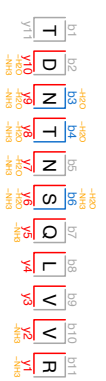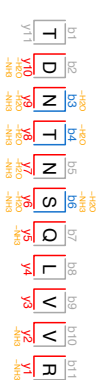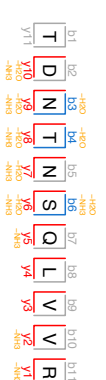

DSSALNHSSKPLPMAPEEK  
Score: 217 : 2036.9837 m/z: 1019.4991 m/z: -1.2129 ppm; MULTI-MSMS

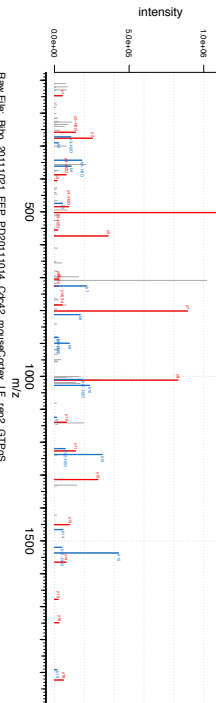

Raw File: Bb0\_20111021.FEP\_P02011014\_C6k42\_mouseCortex\_LF\_age2\_GTF9S  
Scan Number: 4398  
B1:0K61:A3KGC01:081036B1:0X80:A3KGC5:A3KGC4:A3KGC1:081036-2:A3KGC3

DSSALNHSSKPLPMAPEEK  
Score: 217 : 2036.9837 m/z: 1019.4991 m/z: -1.2129 ppm; MULTI-MSMS

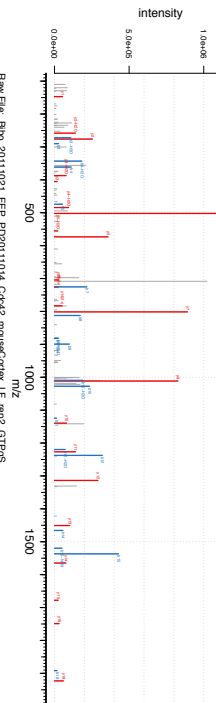

Raw File: Bb0\_20111021.FEP\_P02011014\_C6k42\_mouseCortex\_LF\_age2\_GTF9S  
Scan Number: 4398  
B1:0K61:A3KGC01:081036B1:0X80:A3KGC5:A3KGC4:A3KGC1:081036-2:A3KGC3

DSSALNHSSKPLPMAPEEK  
Score: 217 : 2036.9837 m/z: 1019.4991 m/z: -1.2129 ppm; MULTI-MSMS

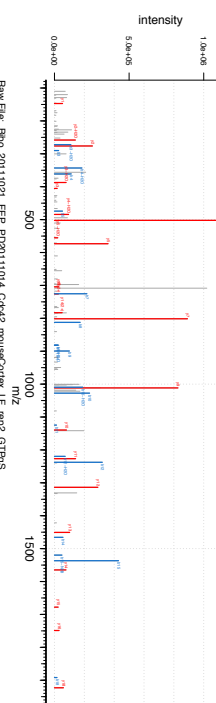

Raw File: Bb0\_20111021.FEP\_P02011014\_C6k42\_mouseCortex\_LF\_age2\_GTF9S  
Scan Number: 4398  
B1:0K61:A3KGC01:081036B1:0X80:A3KGC5:A3KGC4:A3KGC1:081036-2:A3KGC3

DSSALNHSSKPLPMAPEEK  
Score: 217 : 2036.9837 m/z: 1019.4991 m/z: -1.2129 ppm; MULTI-MSMS

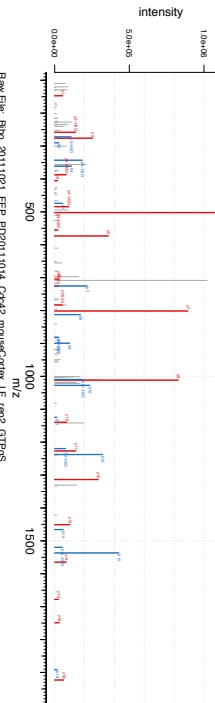

Raw File: Bb0\_20111021.FEP\_P02011014\_C6k42\_mouseCortex\_LF\_age2\_GTF9S  
Scan Number: 4398  
B1:0K61:A3KGC01:081036B1:0X80:A3KGC5:A3KGC4:A3KGC1:081036-2:A3KGC3

DSSALNHSSKPLPMAPEEK  
Score: 217 : 2036.9837 m/z: 1019.4991 m/z: -1.2129 ppm; MULTI-MSMS

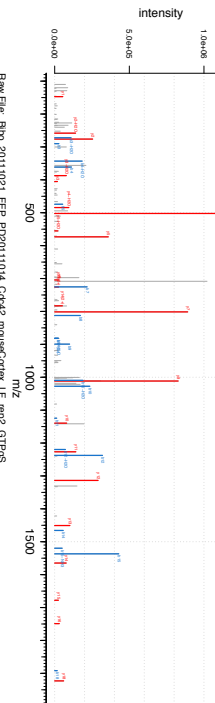

Raw File: Bb0\_20111021.FEP\_P02011014\_C6k42\_mouseCortex\_LF\_age2\_GTF9S  
Scan Number: 4398  
B1:0K61:A3KGC01:081036B1:0X80:A3KGC5:A3KGC4:A3KGC1:081036-2:A3KGC3

DSSALNHSSKPLPMAPEEK  
Score: 217 : 2036.9837 m/z: 1019.4991 m/z: -1.2129 ppm; MULTI-MSMS

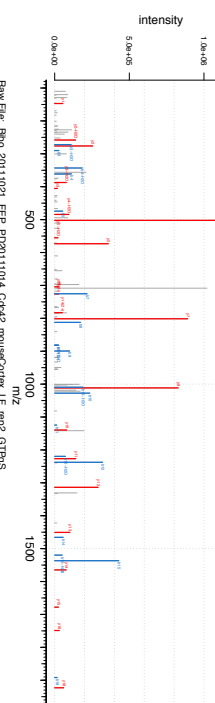

Raw File: Bb0\_20111021.FEP\_P02011014\_C6k42\_mouseCortex\_LF\_age2\_GTF9S  
Scan Number: 4398  
B1:0K61:A3KGC01:081036B1:0X80:A3KGC5:A3KGC4:A3KGC1:081036-2:A3KGC3

DSSALNHSSKPLPMAPEEK  
Score: 217 : 2036.9837 m/z: 1019.4991 m/z: -1.2129 ppm; MULTI-MSMS

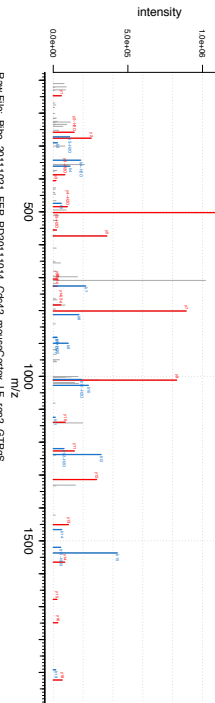

Raw File: Bb0\_20111021.FEP\_P02011014\_C6k42\_mouseCortex\_LF\_age2\_GTF9S  
Scan Number: 4398  
B1:0K61:A3KGC01:081036B1:0X80:A3KGC5:A3KGC4:A3KGC1:081036-2:A3KGC3

DSSALNHSSKPLPMAPEEK  
Score: 217 : 2036.9837 m/z: 1019.4991 m/z: -1.2129 ppm; MULTI-MSMS

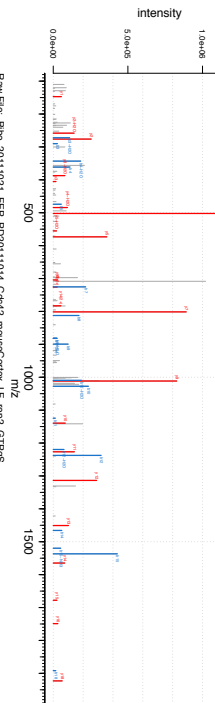

Raw File: Bb0\_20111021.FEP\_P02011014\_C6k42\_mouseCortex\_LF\_age2\_GTF9S  
Scan Number: 4398  
B1:0K61:A3KGC01:081036B1:0X80:A3KGC5:A3KGC4:A3KGC1:081036-2:A3KGC3

DSSALNHSSKPLPMAPEEK  
Score: 217 : 2036.9837 m/z: 1019.4991 m/z: -1.2129 ppm; MULTI-MSMS

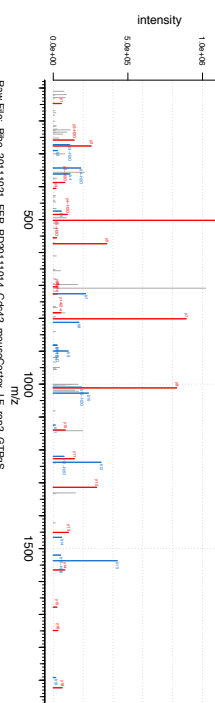

Raw File: Bb0\_20111021.FEP\_P02011014\_C6k42\_mouseCortex\_LF\_age2\_GTF9S  
Scan Number: 4398  
B1:0K61:A3KGC01:081036B1:0X80:A3KGC5:A3KGC4:A3KGC1:081036-2:A3KGC3

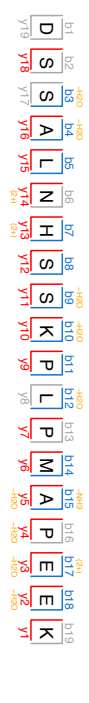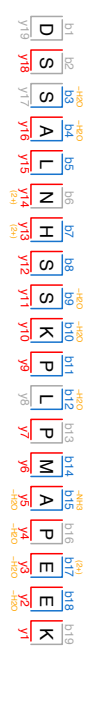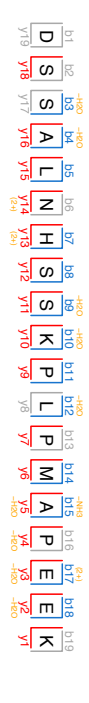





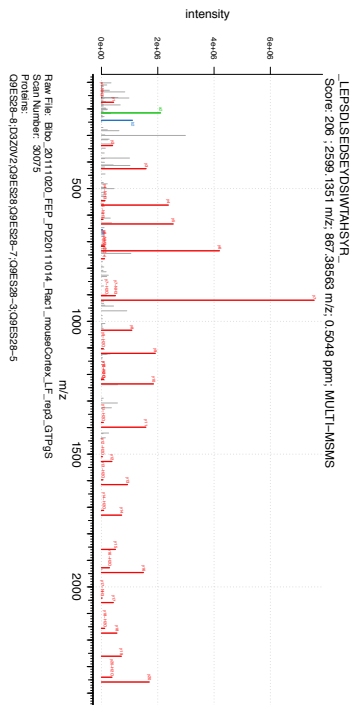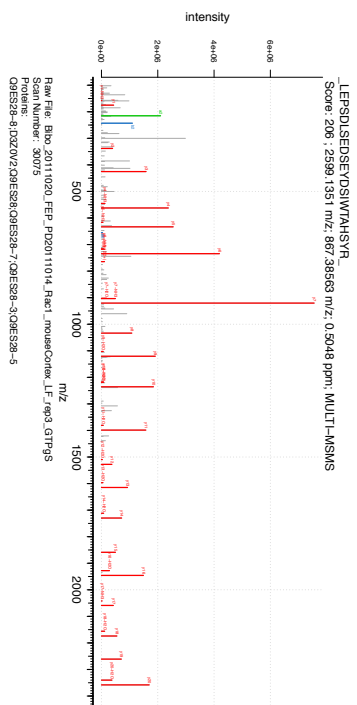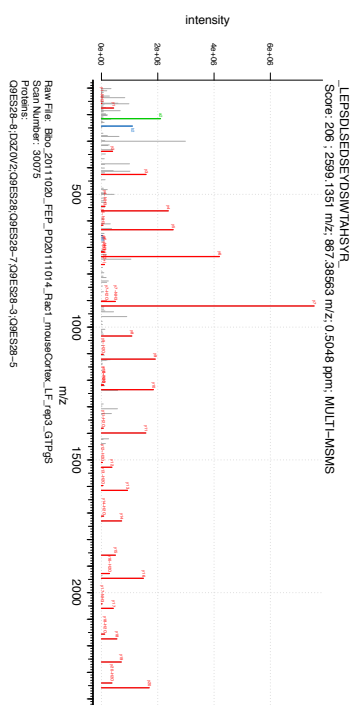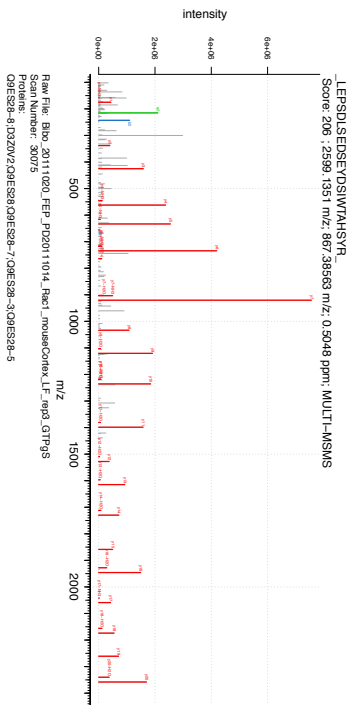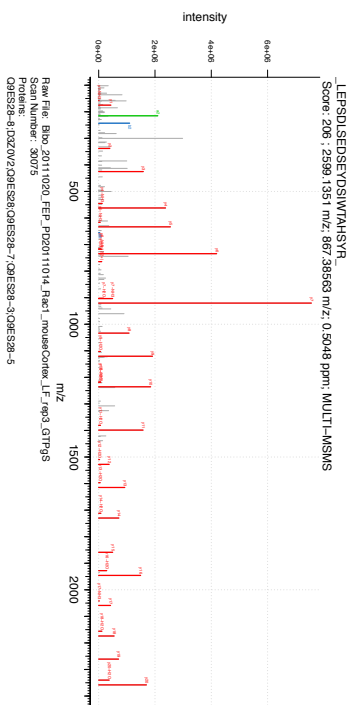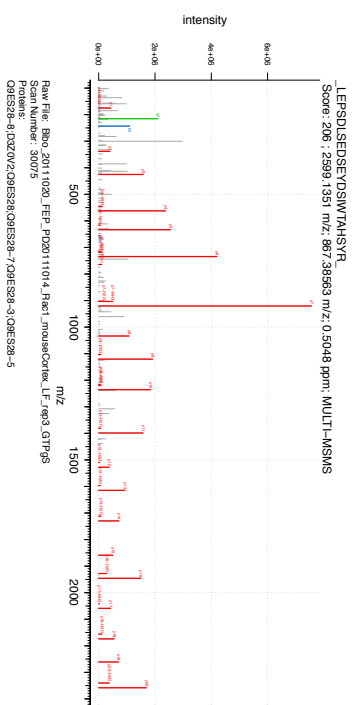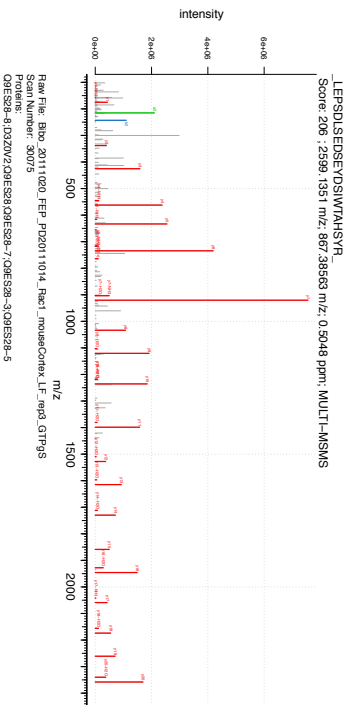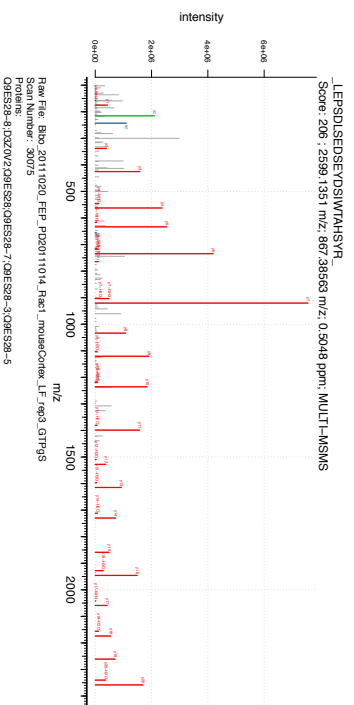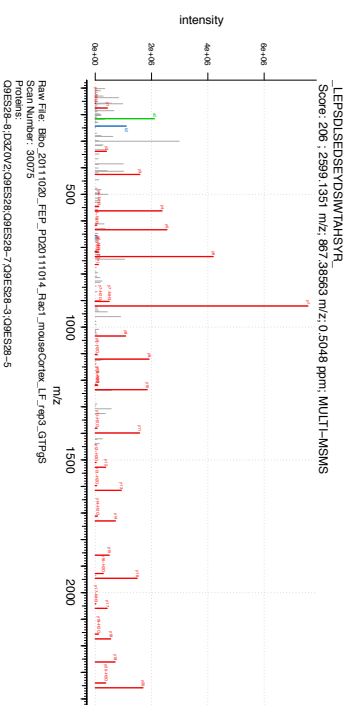



ANVINEMISTER  
Score: 94 ; 1375.6766 m/z; 688.84556 m/z; NaN ppm; MS/MS

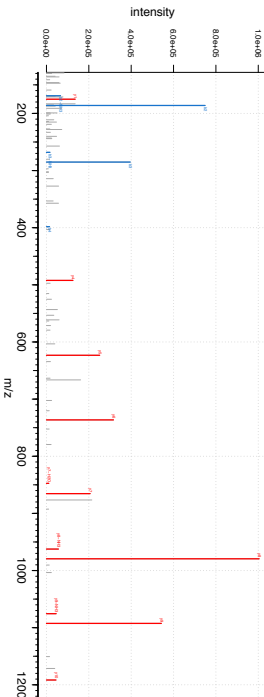

Raw File: BbO\_20111021\_FEP\_PD2011014\_Cckd2\_mouseCortex\_LF\_ep1\_GDP  
Scan Number: 26125  
B1AVKEBQLJ2CQJUTHE-4B1AKXICQJUTHE-3CQJUTHE-2B1AKXIC

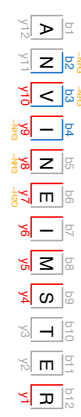

ANVINEMISTER  
Score: 94 ; 1375.6766 m/z; 688.84556 m/z; NaN ppm; MS/MS

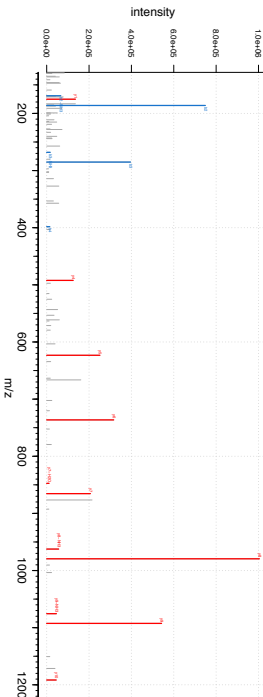

Raw File: BbO\_20111021\_FEP\_PD2011014\_Cckd2\_mouseCortex\_LF\_ep1\_GDP  
Scan Number: 26125  
B1AVKEBQLJ2CQJUTHE-4B1AKXICQJUTHE-3CQJUTHE-2B1AKXIC

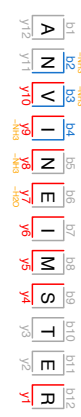

ANVINEMISTER  
Score: 94 ; 1375.6766 m/z; 688.84556 m/z; NaN ppm; MS/MS

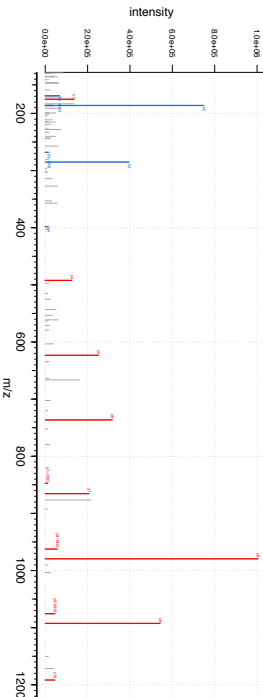

Raw File: BbO\_20111021\_FEP\_PD2011014\_Cckd2\_mouseCortex\_LF\_ep1\_GDP  
Scan Number: 26125  
B1AVKEBQLJ2CQJUTHE-4B1AKXICQJUTHE-3CQJUTHE-2B1AKXIC

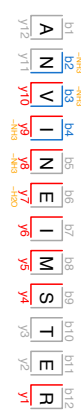

ANVINEMISTER  
Score: 94 ; 1375.6766 m/z; 688.84556 m/z; NaN ppm; MS/MS

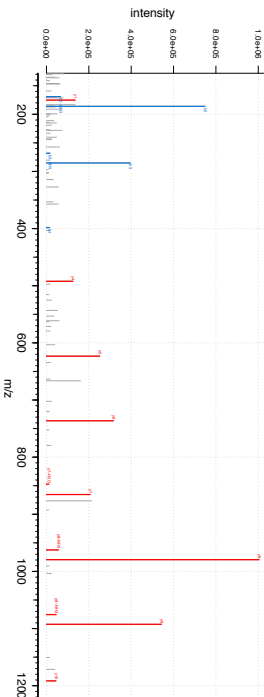

Raw File: BbO\_20111021\_FEP\_PD2011014\_Cckd2\_mouseCortex\_LF\_ep1\_GDP  
Scan Number: 26125  
B1AVKEBQLJ2CQJUTHE-4B1AKXICQJUTHE-3CQJUTHE-2B1AKXIC

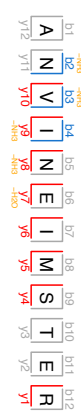

ANVINEMISTER  
Score: 94 ; 1375.6766 m/z; 688.84556 m/z; NaN ppm; MS/MS

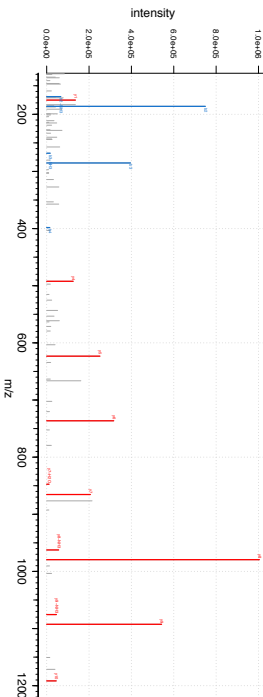

Raw File: BbO\_20111021\_FEP\_PD2011014\_Cckd2\_mouseCortex\_LF\_ep1\_GDP  
Scan Number: 26125  
B1AVKEBQLJ2CQJUTHE-4B1AKXICQJUTHE-3CQJUTHE-2B1AKXIC

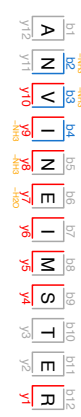

ANVINEMISTER  
Score: 94 ; 1375.6766 m/z; 688.84556 m/z; NaN ppm; MS/MS

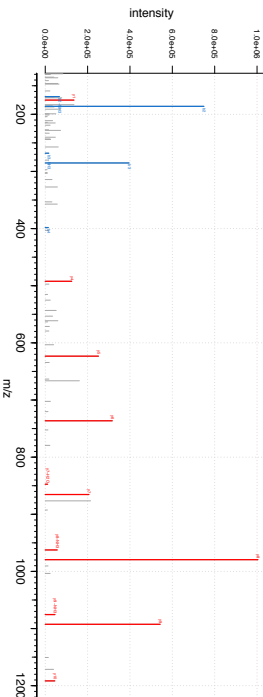

Raw File: BbO\_20111021\_FEP\_PD2011014\_Cckd2\_mouseCortex\_LF\_ep1\_GDP  
Scan Number: 26125  
B1AVKEBQLJ2CQJUTHE-4B1AKXICQJUTHE-3CQJUTHE-2B1AKXIC

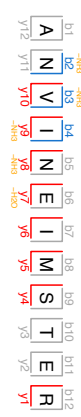

ANVINEMISTER  
Score: 94 ; 1375.6766 m/z; 688.84556 m/z; NaN ppm; MS/MS

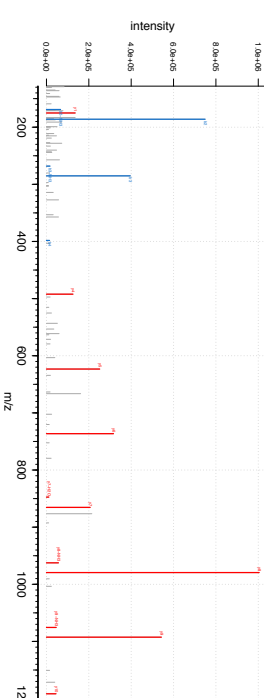

Raw File: BbO\_20111021\_FEP\_PD2011014\_Cckd2\_mouseCortex\_LF\_ep1\_GDP  
Scan Number: 26125  
B1AVKEBQLJ2CQJUTHE-4B1AKXICQJUTHE-3CQJUTHE-2B1AKXIC

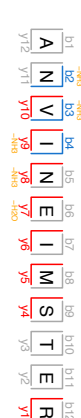

ANVINEMISTER  
Score: 94 ; 1375.6766 m/z; 688.84556 m/z; NaN ppm; MS/MS

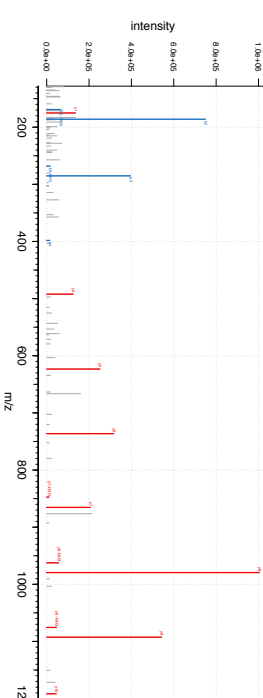

Raw File: BbO\_20111021\_FEP\_PD2011014\_Cckd2\_mouseCortex\_LF\_ep1\_GDP  
Scan Number: 26125  
B1AVKEBQLJ2CQJUTHE-4B1AKXICQJUTHE-3CQJUTHE-2B1AKXIC

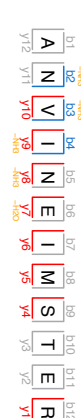

ANVINEMISTER  
Score: 94 ; 1375.6766 m/z; 688.84556 m/z; NaN ppm; MS/MS

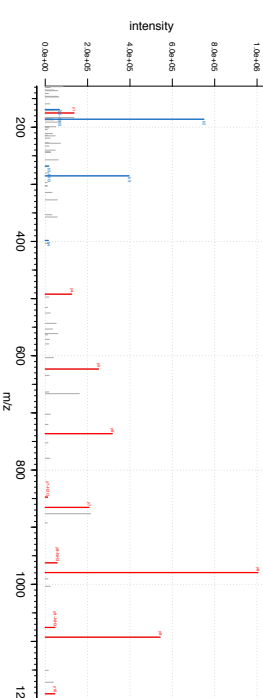

Raw File: BbO\_20111021\_FEP\_PD2011014\_Cckd2\_mouseCortex\_LF\_ep1\_GDP  
Scan Number: 26125  
B1AVKEBQLJ2CQJUTHE-4B1AKXICQJUTHE-3CQJUTHE-2B1AKXIC

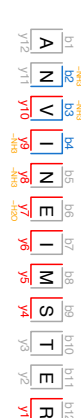

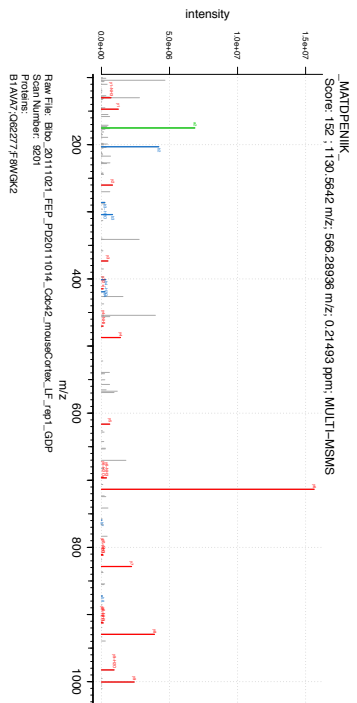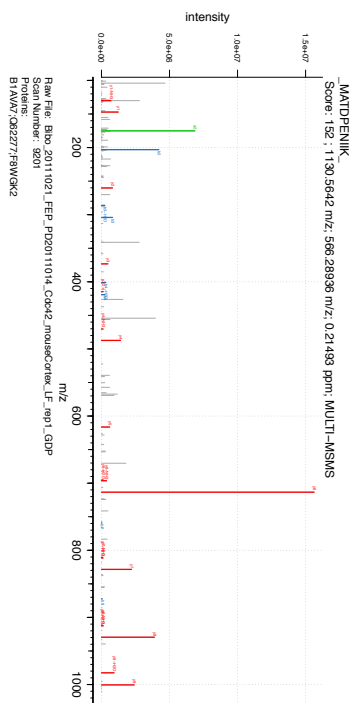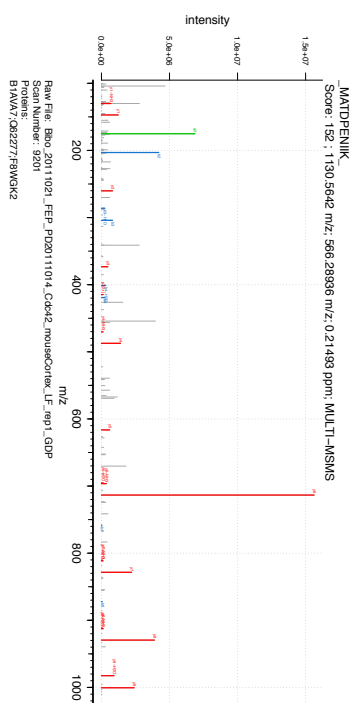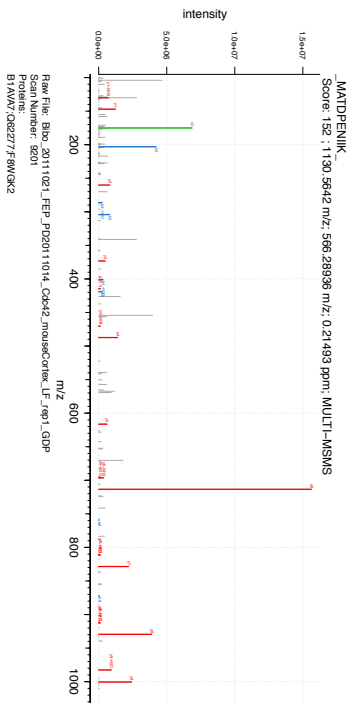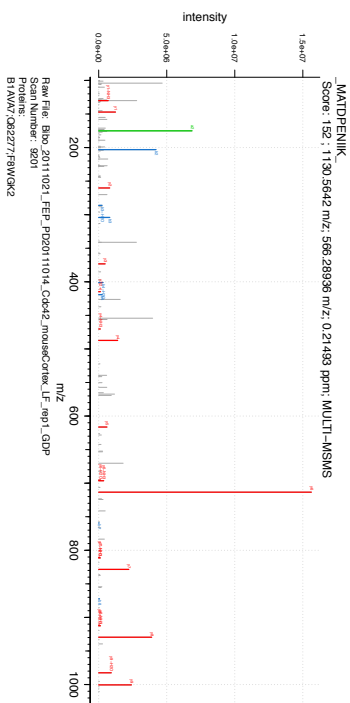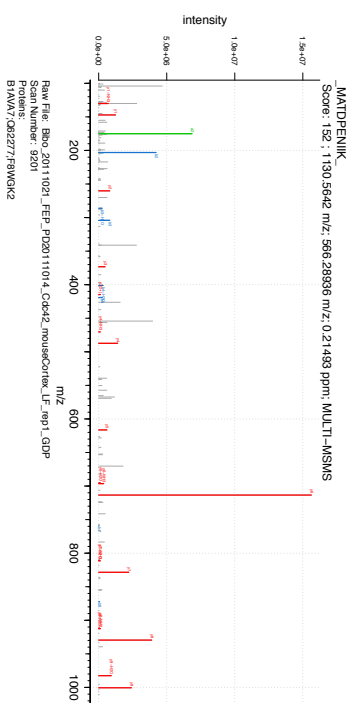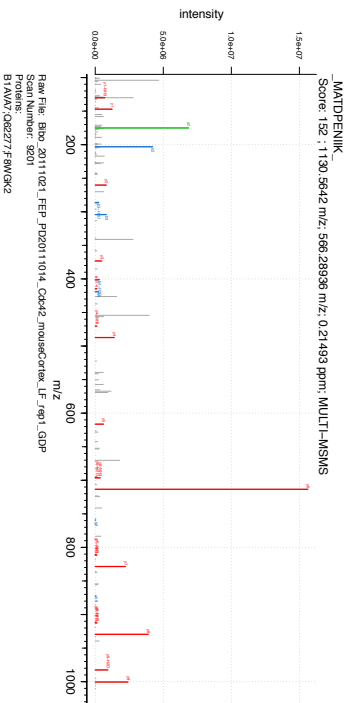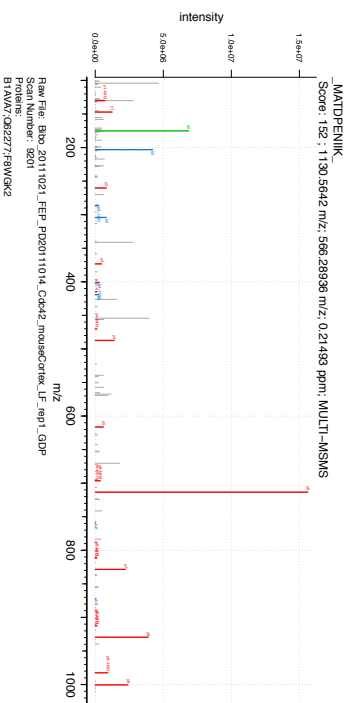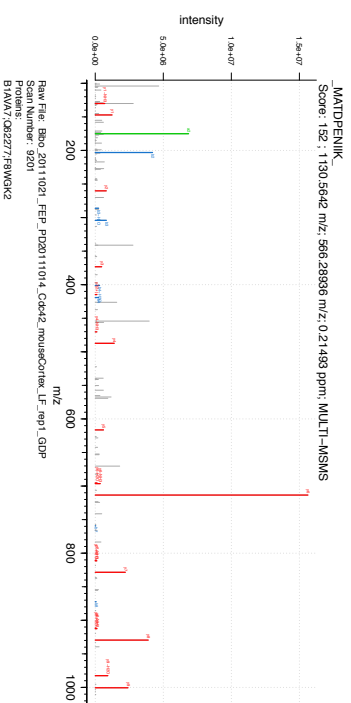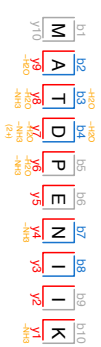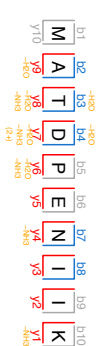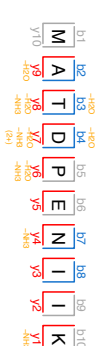



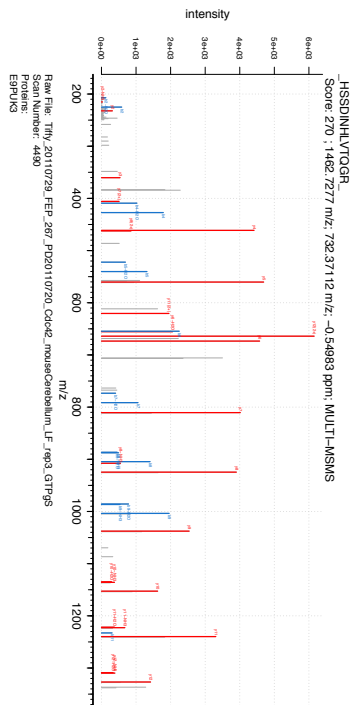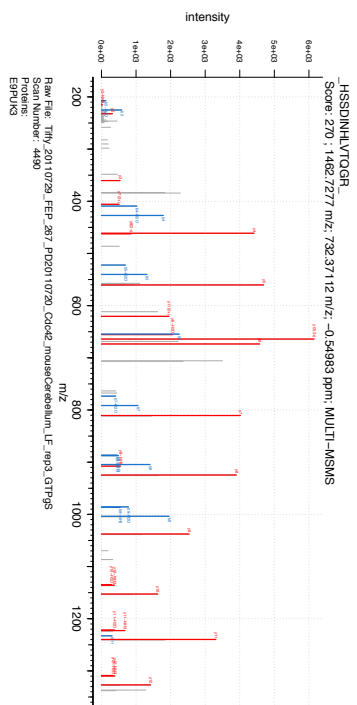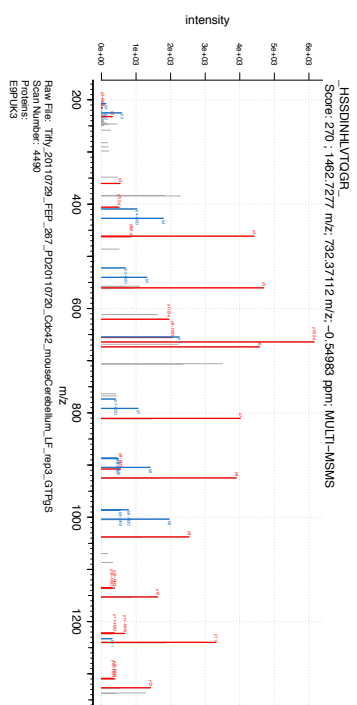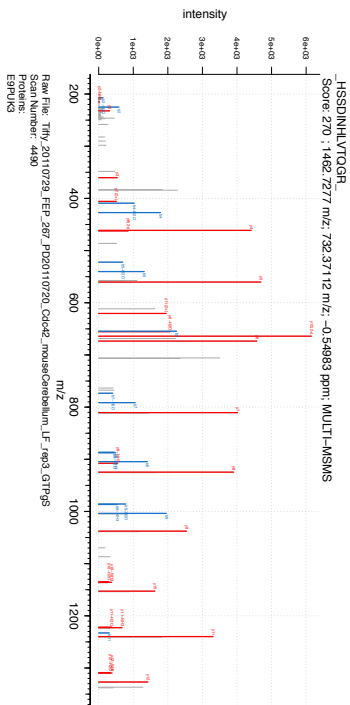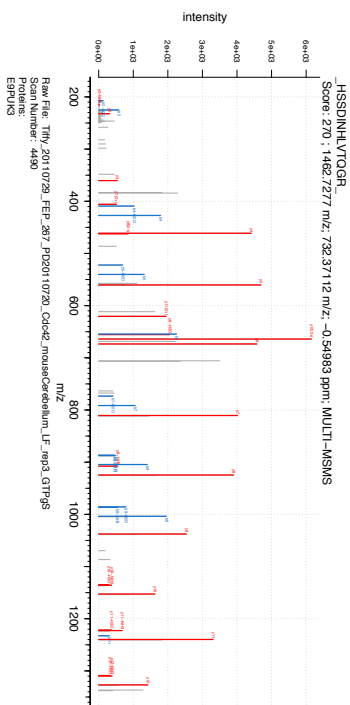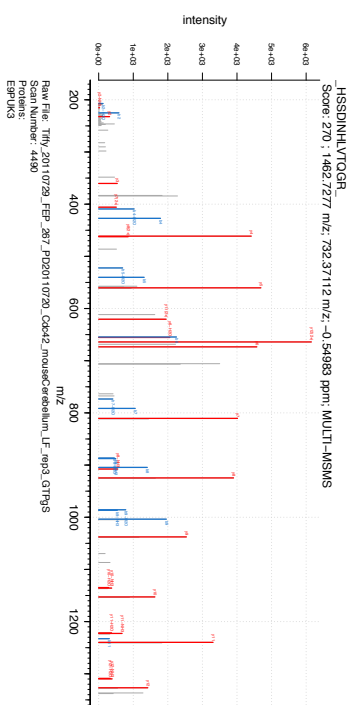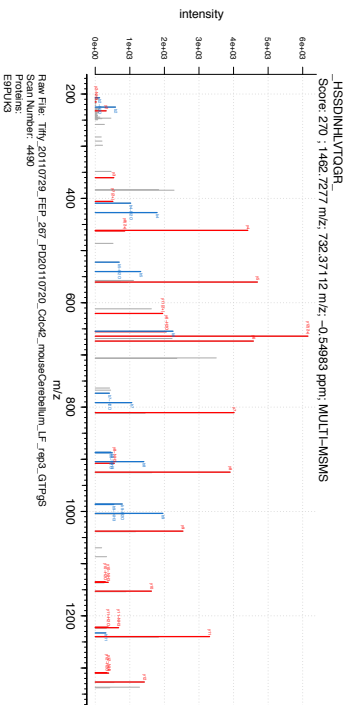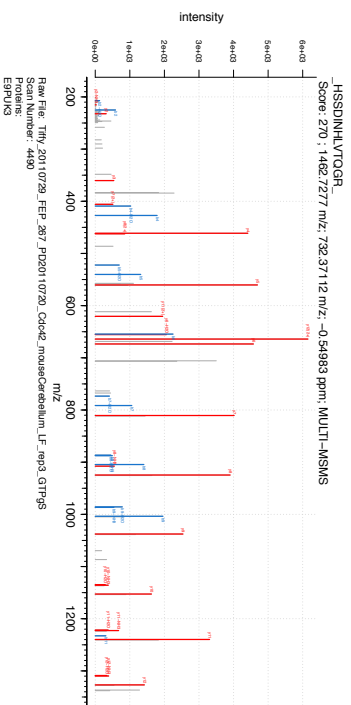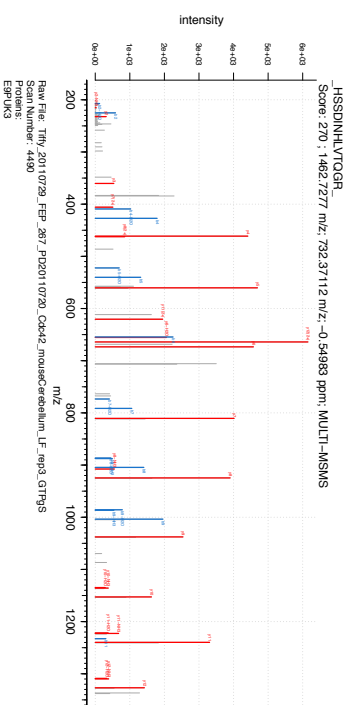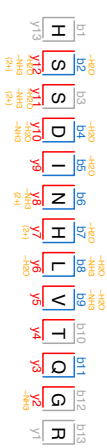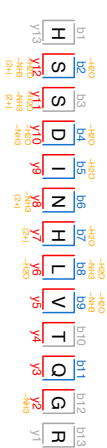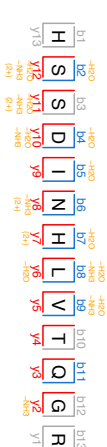

ERPEISL\_PSDFEHTIHNGFDVAVTGFTGPEQWAR

Score: 363 ; 3966.9177 m/z; 992.7367 m/z; 0.65127 ppm; MULTI-MSMS

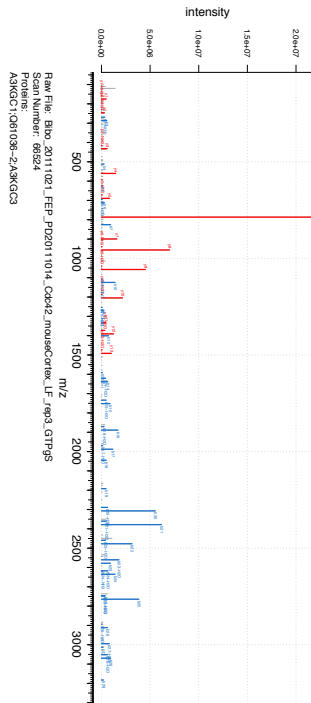

Raw File: Bto\_20111021\_FEP\_PD2011014\_Cdk42\_mouseCorek\_LF\_#93\_GTP#5  
Scan Number: 66524  
ASKGC1:081038-2-ASKGC3

ERPEISL\_PSDFEHTIHNGFDVAVTGFTGPEQWAR

Score: 363 ; 3966.9177 m/z; 992.7367 m/z; 0.65127 ppm; MULTI-MSMS

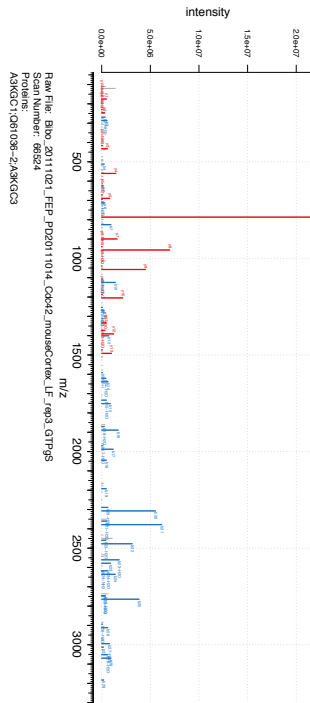

Raw File: Bto\_20111021\_FEP\_PD2011014\_Cdk42\_mouseCorek\_LF\_#93\_GTP#5  
Scan Number: 66524  
ASKGC1:081038-2-ASKGC3

ERPEISL\_PSDFEHTIHNGFDVAVTGFTGPEQWAR

Score: 363 ; 3966.9177 m/z; 992.7367 m/z; 0.65127 ppm; MULTI-MSMS

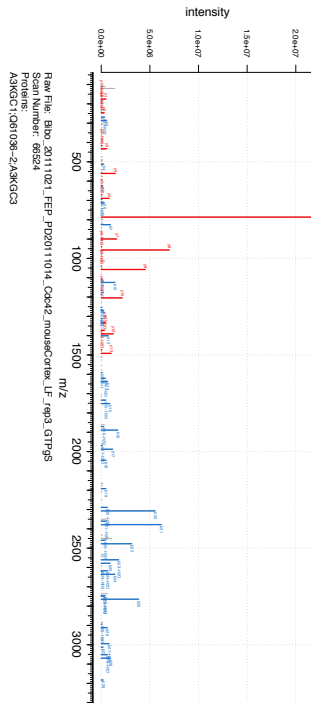

Raw File: Bto\_20111021\_FEP\_PD2011014\_Cdk42\_mouseCorek\_LF\_#93\_GTP#5  
Scan Number: 66524  
ASKGC1:081038-2-ASKGC3

ERPEISL\_PSDFEHTIHNGFDVAVTGFTGPEQWAR

Score: 363 ; 3966.9177 m/z; 992.7367 m/z; 0.65127 ppm; MULTI-MSMS

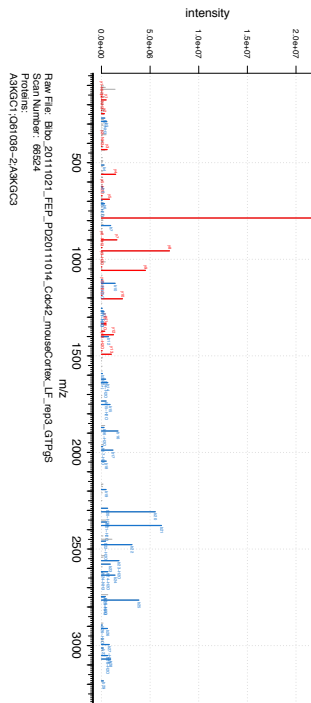

Raw File: Bto\_20111021\_FEP\_PD2011014\_Cdk42\_mouseCorek\_LF\_#93\_GTP#5  
Scan Number: 66524  
ASKGC1:081038-2-ASKGC3

ERPEISL\_PSDFEHTIHNGFDVAVTGFTGPEQWAR

Score: 363 ; 3966.9177 m/z; 992.7367 m/z; 0.65127 ppm; MULTI-MSMS

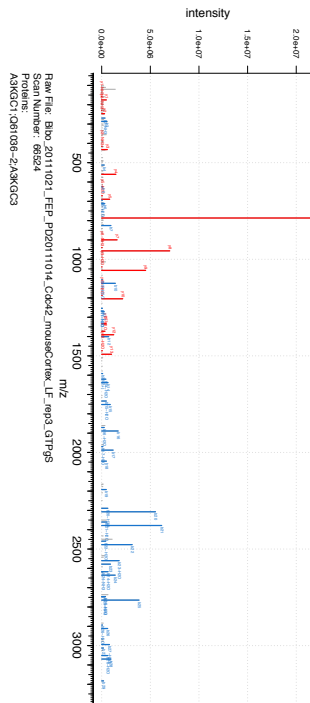

Raw File: Bto\_20111021\_FEP\_PD2011014\_Cdk42\_mouseCorek\_LF\_#93\_GTP#5  
Scan Number: 66524  
ASKGC1:081038-2-ASKGC3

ERPEISL\_PSDFEHTIHNGFDVAVTGFTGPEQWAR

Score: 363 ; 3966.9177 m/z; 992.7367 m/z; 0.65127 ppm; MULTI-MSMS

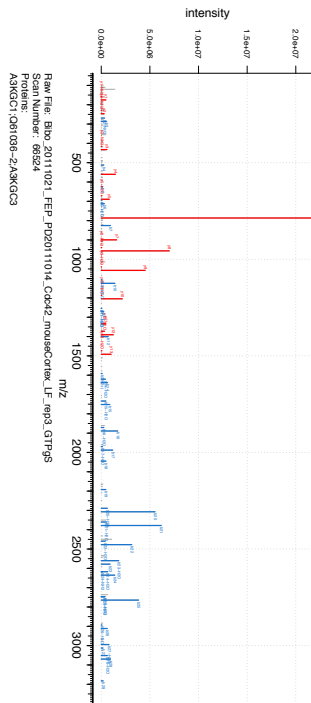

Raw File: Bto\_20111021\_FEP\_PD2011014\_Cdk42\_mouseCorek\_LF\_#93\_GTP#5  
Scan Number: 66524  
ASKGC1:081038-2-ASKGC3

ERPEISL\_PSDFEHTIHNGFDVAVTGFTGPEQWAR

Score: 363 ; 3966.9177 m/z; 992.7367 m/z; 0.65127 ppm; MULTI-MSMS

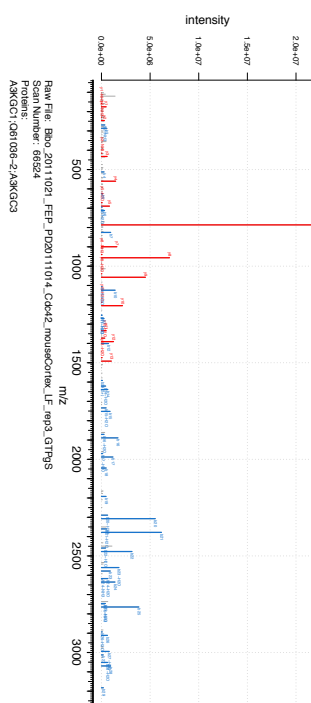

Raw File: Bto\_20111021\_FEP\_PD2011014\_Cdk42\_mouseCorek\_LF\_#93\_GTP#5  
Scan Number: 66524  
ASKGC1:081038-2-ASKGC3

ERPEISL\_PSDFEHTIHNGFDVAVTGFTGPEQWAR

Score: 363 ; 3966.9177 m/z; 992.7367 m/z; 0.65127 ppm; MULTI-MSMS

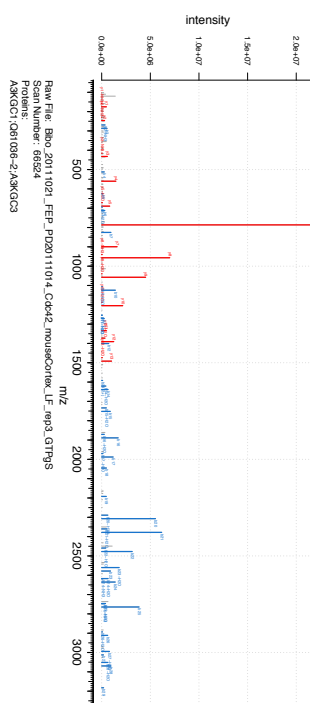

Raw File: Bto\_20111021\_FEP\_PD2011014\_Cdk42\_mouseCorek\_LF\_#93\_GTP#5  
Scan Number: 66524  
ASKGC1:081038-2-ASKGC3

ERPEISL\_PSDFEHTIHNGFDVAVTGFTGPEQWAR

Score: 363 ; 3966.9177 m/z; 992.7367 m/z; 0.65127 ppm; MULTI-MSMS

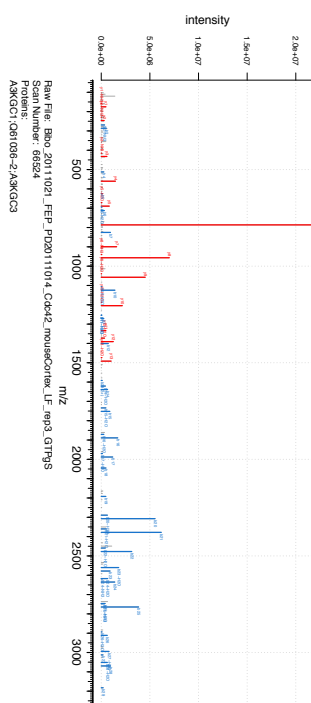

Raw File: Bto\_20111021\_FEP\_PD2011014\_Cdk42\_mouseCorek\_LF\_#93\_GTP#5  
Scan Number: 66524  
ASKGC1:081038-2-ASKGC3

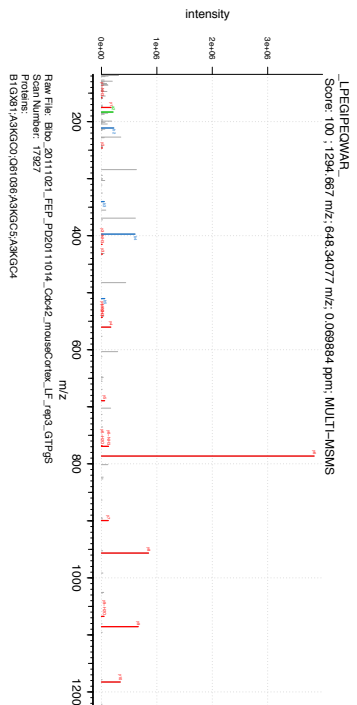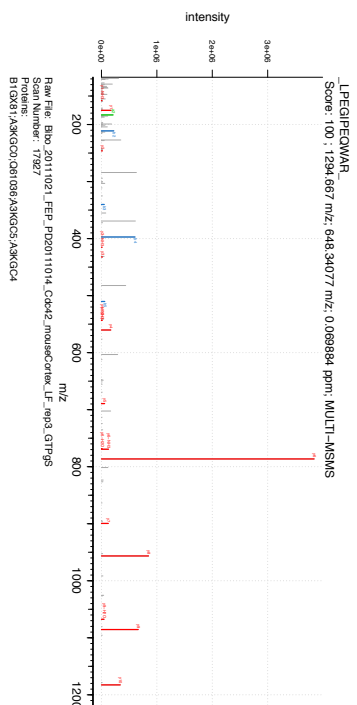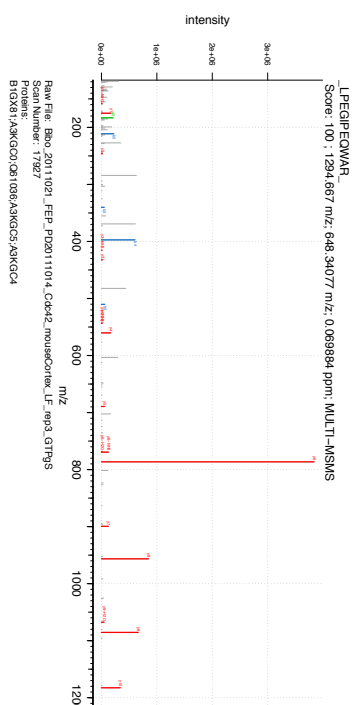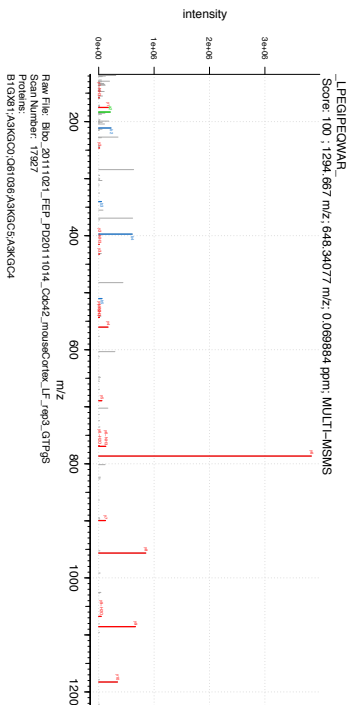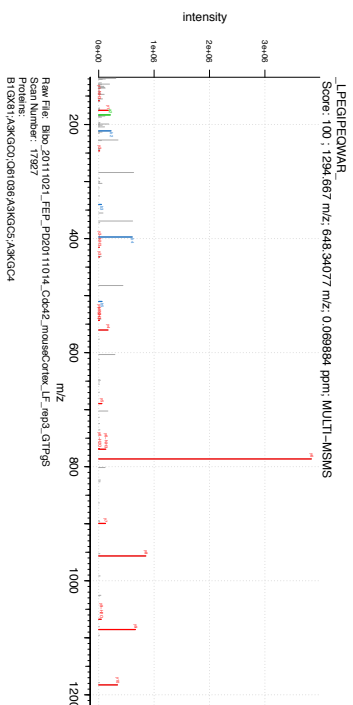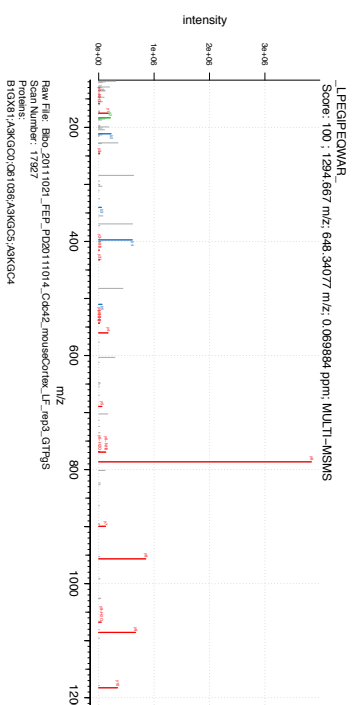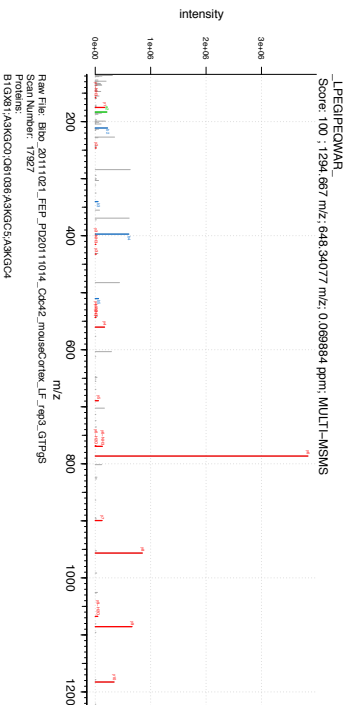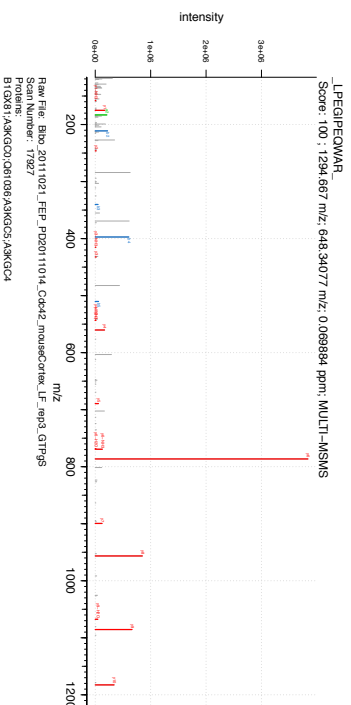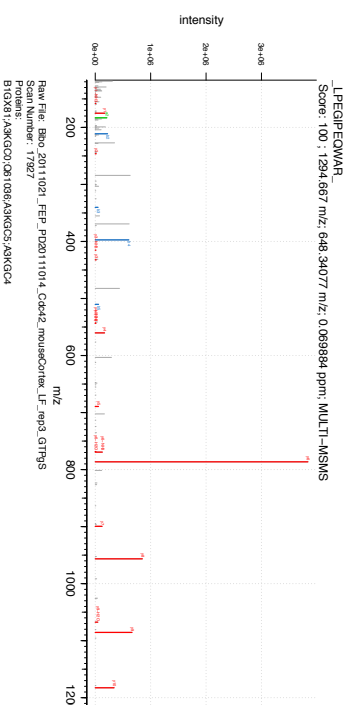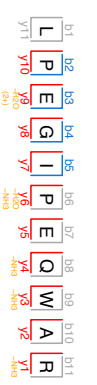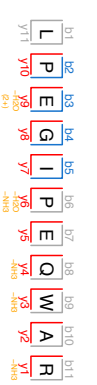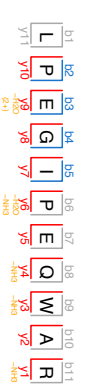

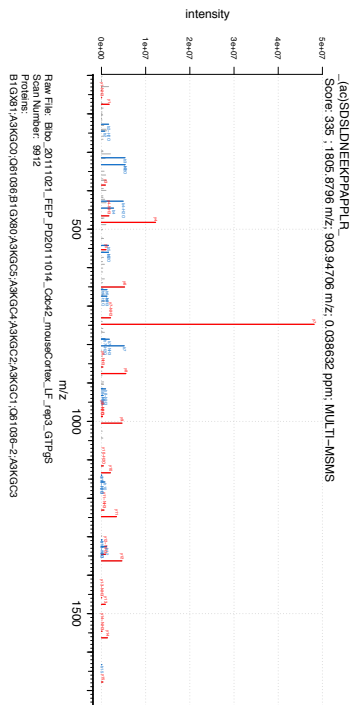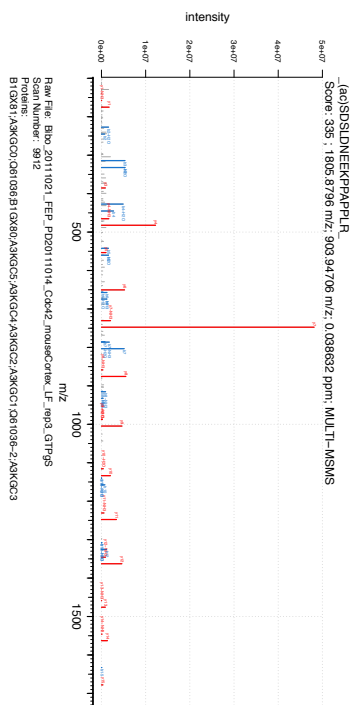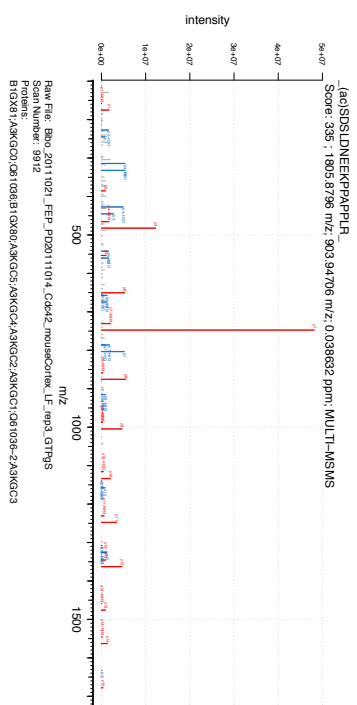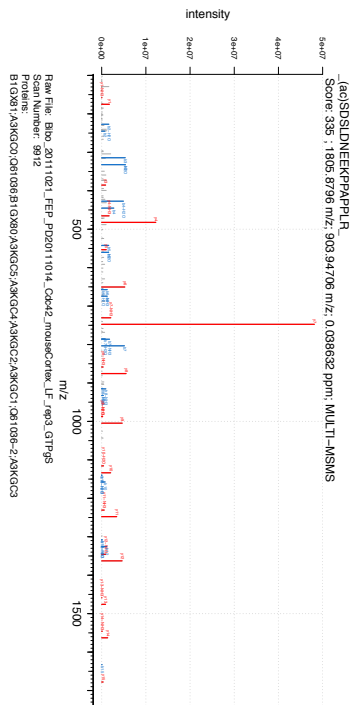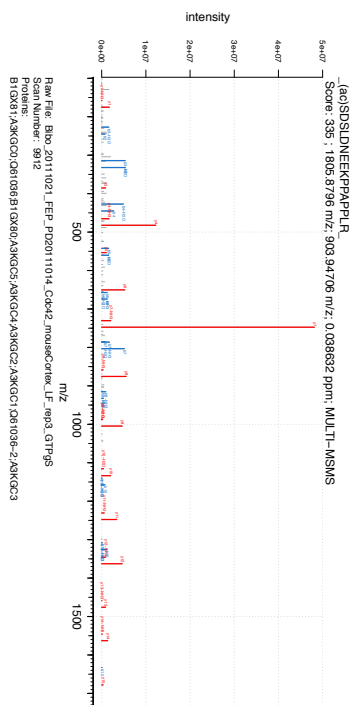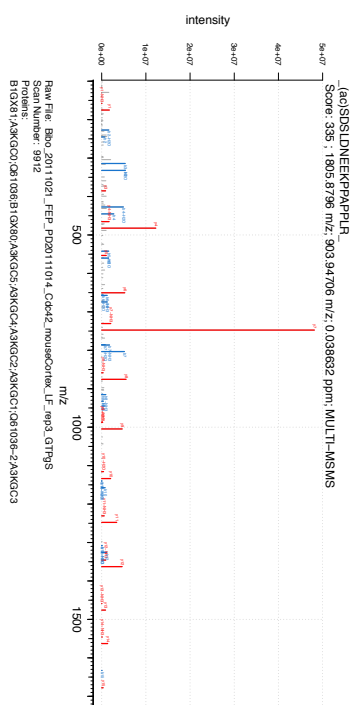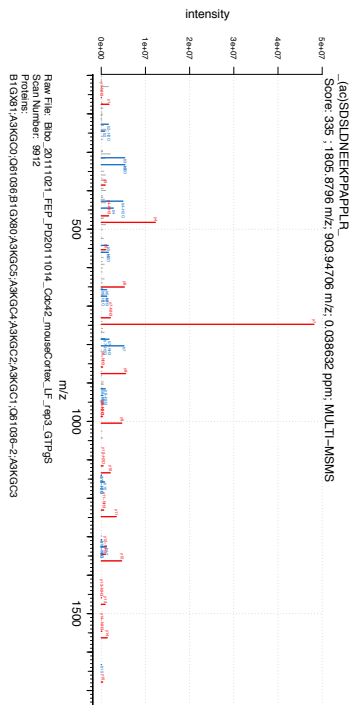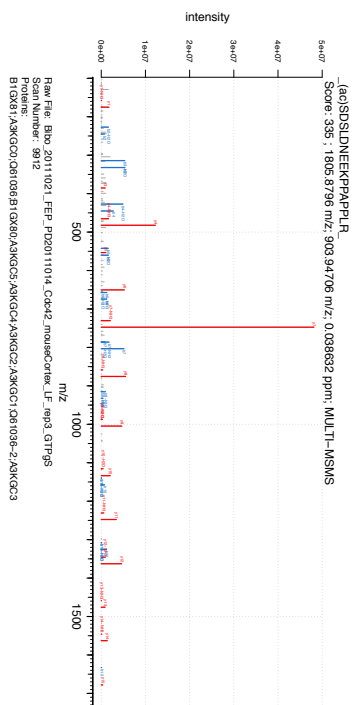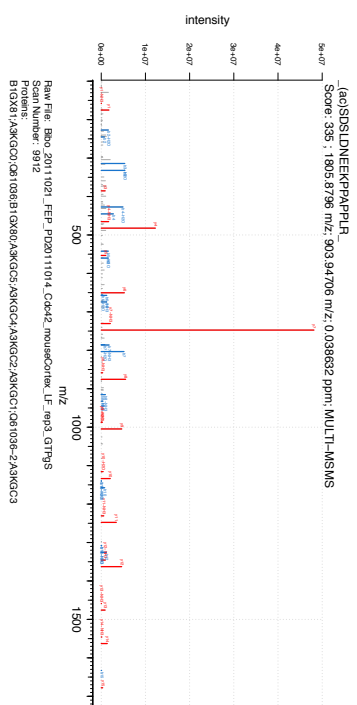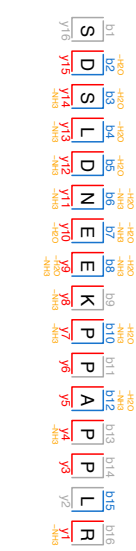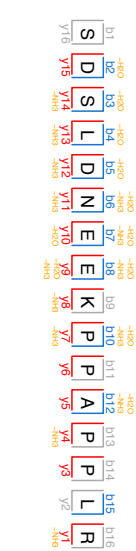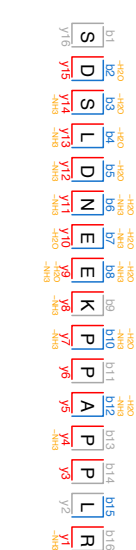

DIKSDNLLIGMDSYK  
Score: 229 ; 1703.8764 m/z; 852.94547 m/z; -0.03263 ppm; MULTI-MSMS

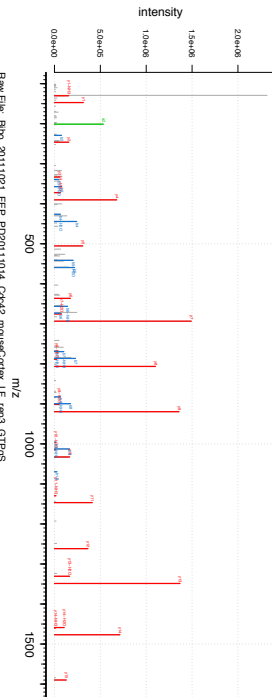

Raw File: Bb0\_20111021\_FEP\_P20211014\_Cckd2\_mouseCortek\_LF\_rep3\_GTPq5  
Scan Number: 20845  
B1:GX81;A:KXGCO;O81:086B1;OXB0:A:KXGCI;O81:086;-2;GSE894;O8843

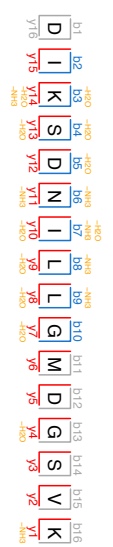

DIKSDNLLIGMDSYK  
Score: 229 ; 1703.8764 m/z; 852.94547 m/z; -0.03263 ppm; MULTI-MSMS

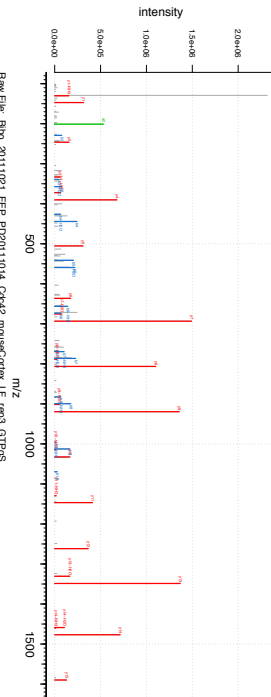

Raw File: Bb0\_20111021\_FEP\_P20211014\_Cckd2\_mouseCortek\_LF\_rep3\_GTPq5  
Scan Number: 20845  
B1:GX81;A:KXGCO;O81:086B1;OXB0:A:KXGCI;O81:086;-2;GSE894;O8843

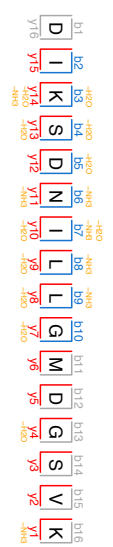

DIKSDNLLIGMDSYK  
Score: 229 ; 1703.8764 m/z; 852.94547 m/z; -0.03263 ppm; MULTI-MSMS

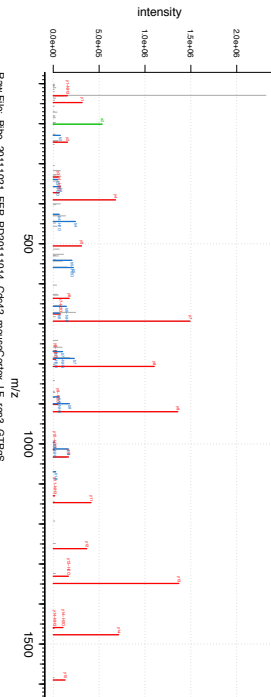

Raw File: Bb0\_20111021\_FEP\_P20211014\_Cckd2\_mouseCortek\_LF\_rep3\_GTPq5  
Scan Number: 20845  
B1:GX81;A:KXGCO;O81:086B1;OXB0:A:KXGCI;O81:086;-2;GSE894;O8843

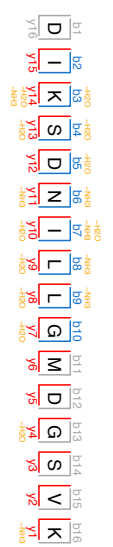

DIKSDNLLIGMDSYK  
Score: 229 ; 1703.8764 m/z; 852.94547 m/z; -0.03263 ppm; MULTI-MSMS

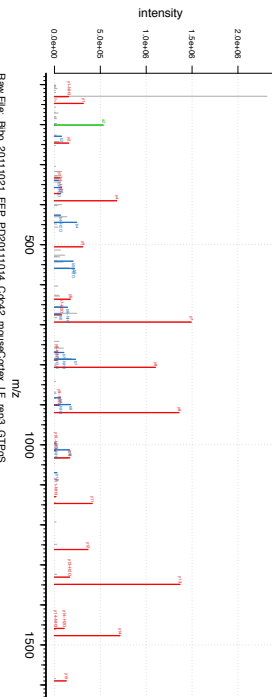

Raw File: Bb0\_20111021\_FEP\_P20211014\_Cckd2\_mouseCortek\_LF\_rep3\_GTPq5  
Scan Number: 20845  
B1:GX81;A:KXGCO;O81:086B1;OXB0:A:KXGCI;O81:086;-2;GSE894;O8843

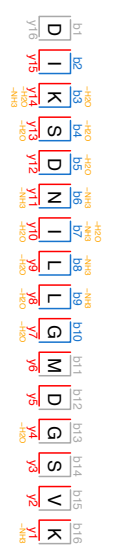

DIKSDNLLIGMDSYK  
Score: 229 ; 1703.8764 m/z; 852.94547 m/z; -0.03263 ppm; MULTI-MSMS

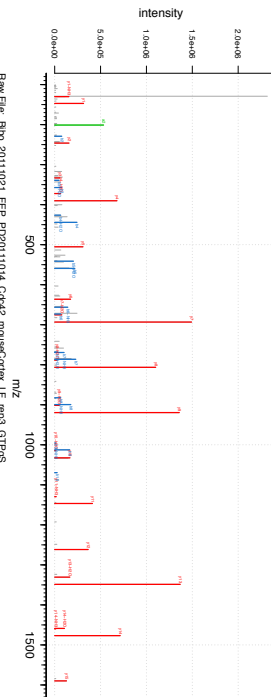

Raw File: Bb0\_20111021\_FEP\_P20211014\_Cckd2\_mouseCortek\_LF\_rep3\_GTPq5  
Scan Number: 20845  
B1:GX81;A:KXGCO;O81:086B1;OXB0:A:KXGCI;O81:086;-2;GSE894;O8843

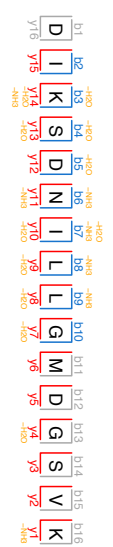

DIKSDNLLIGMDSYK  
Score: 229 ; 1703.8764 m/z; 852.94547 m/z; -0.03263 ppm; MULTI-MSMS

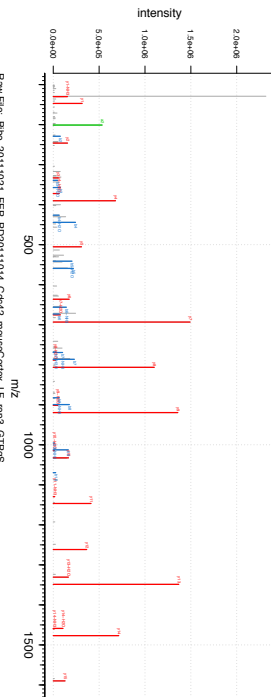

Raw File: Bb0\_20111021\_FEP\_P20211014\_Cckd2\_mouseCortek\_LF\_rep3\_GTPq5  
Scan Number: 20845  
B1:GX81;A:KXGCO;O81:086B1;OXB0:A:KXGCI;O81:086;-2;GSE894;O8843

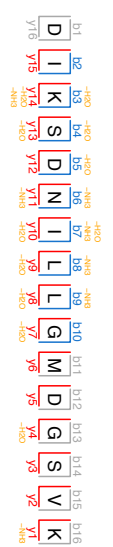

DIKSDNLLIGMDSYK  
Score: 229 ; 1703.8764 m/z; 852.94547 m/z; -0.03263 ppm; MULTI-MSMS

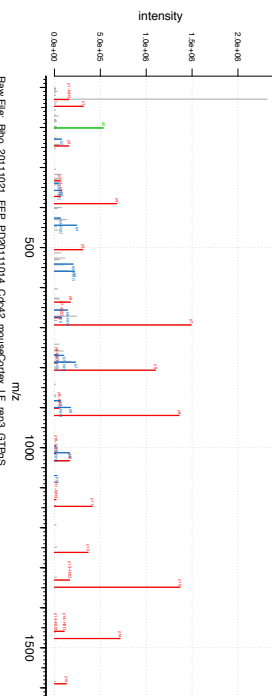

Raw File: Bb0\_20111021\_FEP\_P20211014\_Cckd2\_mouseCortek\_LF\_rep3\_GTPq5  
Scan Number: 20845  
B1:GX81;A:KXGCO;O81:086B1;OXB0:A:KXGCI;O81:086;-2;GSE894;O8843

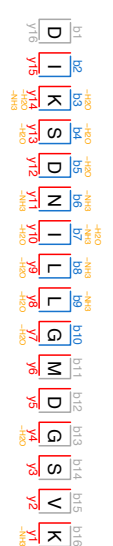

DIKSDNLLIGMDSYK  
Score: 229 ; 1703.8764 m/z; 852.94547 m/z; -0.03263 ppm; MULTI-MSMS

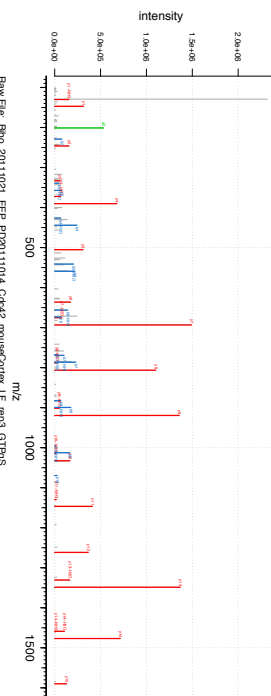

Raw File: Bb0\_20111021\_FEP\_P20211014\_Cckd2\_mouseCortek\_LF\_rep3\_GTPq5  
Scan Number: 20845  
B1:GX81;A:KXGCO;O81:086B1;OXB0:A:KXGCI;O81:086;-2;GSE894;O8843

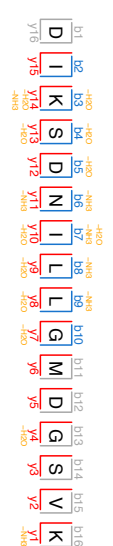

DIKSDNLLIGMDSYK  
Score: 229 ; 1703.8764 m/z; 852.94547 m/z; -0.03263 ppm; MULTI-MSMS

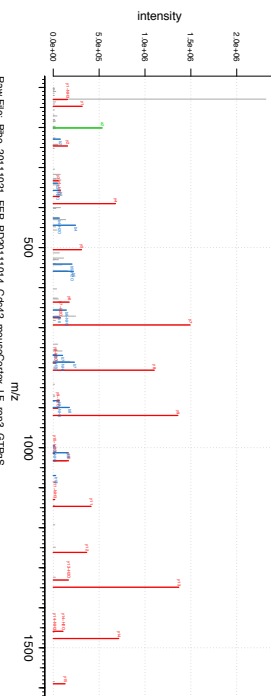

Raw File: Bb0\_20111021\_FEP\_P20211014\_Cckd2\_mouseCortek\_LF\_rep3\_GTPq5  
Scan Number: 20845  
B1:GX81;A:KXGCO;O81:086B1;OXB0:A:KXGCI;O81:086;-2;GSE894;O8843

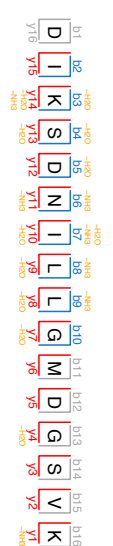





SAHGVIAAHOSNTK  
Score: 330 ; 1483.7168 m/z; 742.86567 m/z; 0.067042 ppm; MULTI-MS/MS

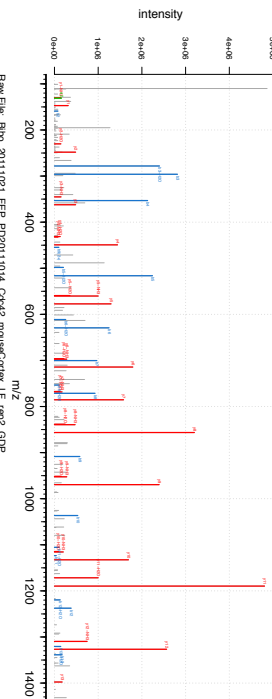

Raw File: Bto\_20111021\_FEP\_P02011014\_C6k42\_mouseCortex\_LF\_rep2\_GDP  
Scan Number: 393  
B1:GK6T1A3KGC01:081036B1:GX80VA3KGC5:ASKGC4:ASKGC1:081036-2

SAHGVIAAHOSNTK  
Score: 330 ; 1483.7168 m/z; 742.86567 m/z; 0.067042 ppm; MULTI-MS/MS

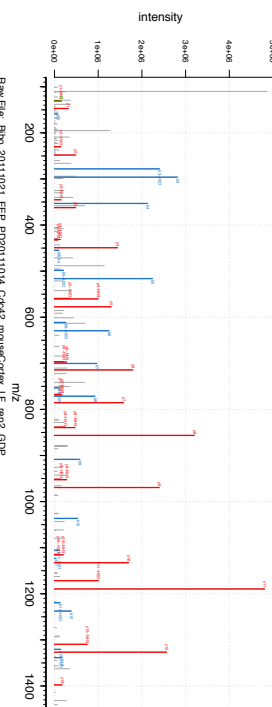

Raw File: Bto\_20111021\_FEP\_P02011014\_C6k42\_mouseCortex\_LF\_rep2\_GDP  
Scan Number: 393  
B1:GK6T1A3KGC01:081036B1:GX80VA3KGC5:ASKGC4:ASKGC1:081036-2

SAHGVIAAHOSNTK  
Score: 330 ; 1483.7168 m/z; 742.86567 m/z; 0.067042 ppm; MULTI-MS/MS

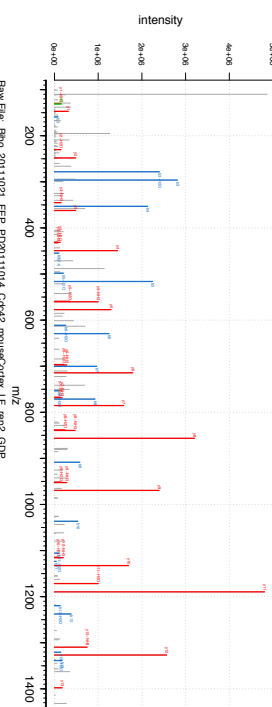

Raw File: Bto\_20111021\_FEP\_P02011014\_C6k42\_mouseCortex\_LF\_rep2\_GDP  
Scan Number: 393  
B1:GK6T1A3KGC01:081036B1:GX80VA3KGC5:ASKGC4:ASKGC1:081036-2

SAHGVIAAHOSNTK  
Score: 330 ; 1483.7168 m/z; 742.86567 m/z; 0.067042 ppm; MULTI-MS/MS

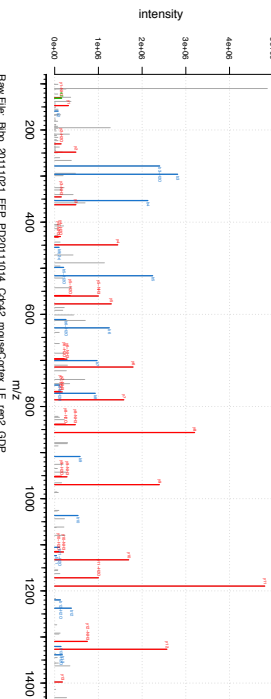

Raw File: Bto\_20111021\_FEP\_P02011014\_C6k42\_mouseCortex\_LF\_rep2\_GDP  
Scan Number: 393  
B1:GK6T1A3KGC01:081036B1:GX80VA3KGC5:ASKGC4:ASKGC1:081036-2

SAHGVIAAHOSNTK  
Score: 330 ; 1483.7168 m/z; 742.86567 m/z; 0.067042 ppm; MULTI-MS/MS

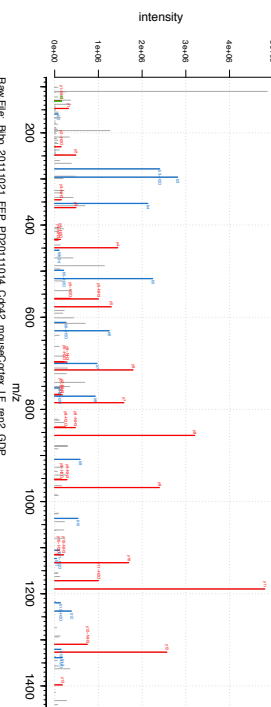

Raw File: Bto\_20111021\_FEP\_P02011014\_C6k42\_mouseCortex\_LF\_rep2\_GDP  
Scan Number: 393  
B1:GK6T1A3KGC01:081036B1:GX80VA3KGC5:ASKGC4:ASKGC1:081036-2

SAHGVIAAHOSNTK  
Score: 330 ; 1483.7168 m/z; 742.86567 m/z; 0.067042 ppm; MULTI-MS/MS

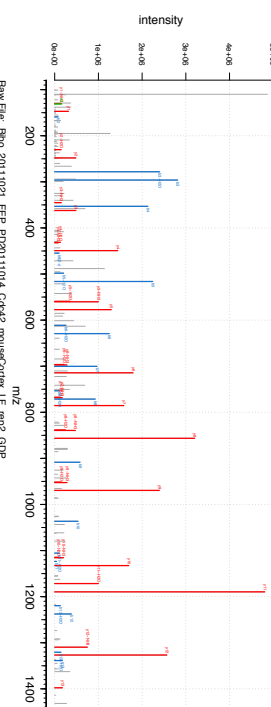

Raw File: Bto\_20111021\_FEP\_P02011014\_C6k42\_mouseCortex\_LF\_rep2\_GDP  
Scan Number: 393  
B1:GK6T1A3KGC01:081036B1:GX80VA3KGC5:ASKGC4:ASKGC1:081036-2

SAHGVIAAHOSNTK  
Score: 330 ; 1483.7168 m/z; 742.86567 m/z; 0.067042 ppm; MULTI-MS/MS

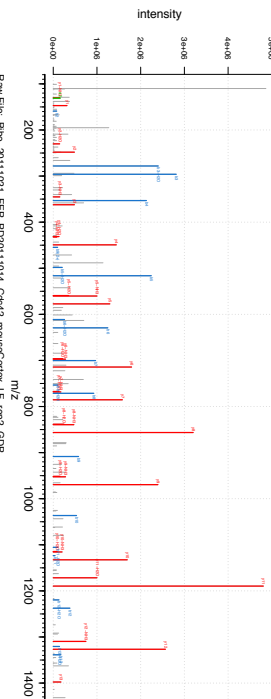

Raw File: Bto\_20111021\_FEP\_P02011014\_C6k42\_mouseCortex\_LF\_rep2\_GDP  
Scan Number: 393  
B1:GK6T1A3KGC01:081036B1:GX80VA3KGC5:ASKGC4:ASKGC1:081036-2

SAHGVIAAHOSNTK  
Score: 330 ; 1483.7168 m/z; 742.86567 m/z; 0.067042 ppm; MULTI-MS/MS

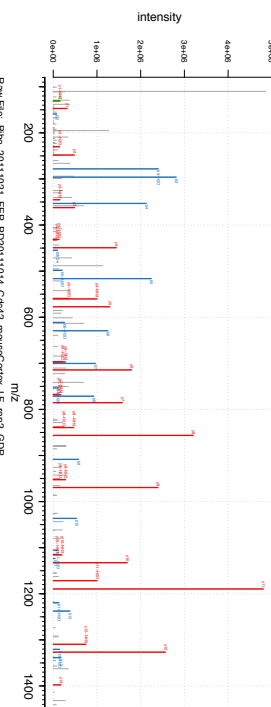

Raw File: Bto\_20111021\_FEP\_P02011014\_C6k42\_mouseCortex\_LF\_rep2\_GDP  
Scan Number: 393  
B1:GK6T1A3KGC01:081036B1:GX80VA3KGC5:ASKGC4:ASKGC1:081036-2

SAHGVIAAHOSNTK  
Score: 330 ; 1483.7168 m/z; 742.86567 m/z; 0.067042 ppm; MULTI-MS/MS

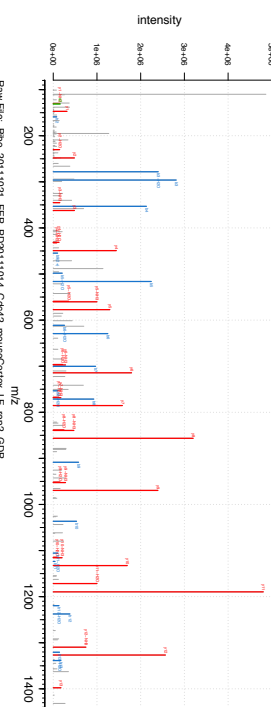

Raw File: Bto\_20111021\_FEP\_P02011014\_C6k42\_mouseCortex\_LF\_rep2\_GDP  
Scan Number: 393  
B1:GK6T1A3KGC01:081036B1:GX80VA3KGC5:ASKGC4:ASKGC1:081036-2

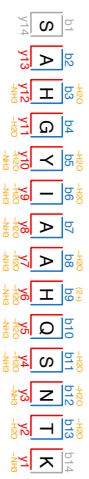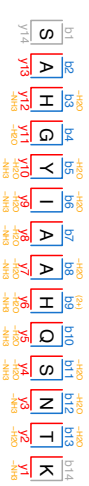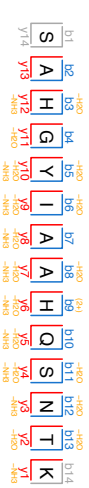

ELINEIIVMR  
Score: 286 : 1341.769 m/z; 671.89178 m/z; 1.1256 ppm; MULT-MSMS

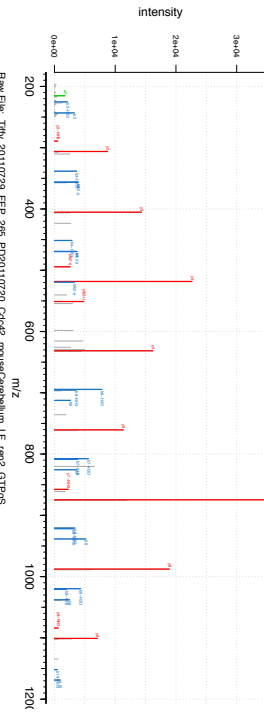

Raw File: TINY\_20110729\_FEP\_285\_PD2010720\_Ckx2\_mouseCerebellum\_LF\_ap2\_GTPyS  
Scan Number: 25078  
BiGX81:AKGCGI:061036B1:GX80:AKKGC5:AYKGC1:061036-2:GSE5884:O88843

ELINEIIVMR  
Score: 286 : 1341.769 m/z; 671.89178 m/z; 1.1256 ppm; MULT-MSMS

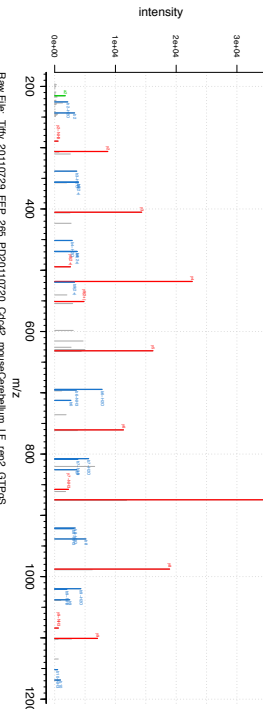

Raw File: TINY\_20110729\_FEP\_285\_PD2010720\_Ckx2\_mouseCerebellum\_LF\_ap2\_GTPyS  
Scan Number: 25078  
BiGX81:AKGCGI:061036B1:GX80:AKKGC5:AYKGC1:061036-2:GSE5884:O88843

ELINEIIVMR  
Score: 286 : 1341.769 m/z; 671.89178 m/z; 1.1256 ppm; MULT-MSMS

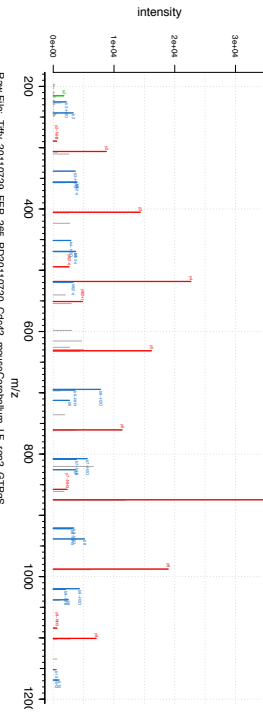

Raw File: TINY\_20110729\_FEP\_285\_PD2010720\_Ckx2\_mouseCerebellum\_LF\_ap2\_GTPyS  
Scan Number: 25078  
BiGX81:AKGCGI:061036B1:GX80:AKKGC5:AYKGC1:061036-2:GSE5884:O88843

ELINEIIVMR  
Score: 286 : 1341.769 m/z; 671.89178 m/z; 1.1256 ppm; MULT-MSMS

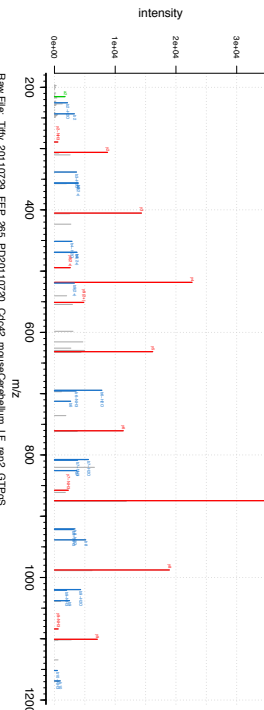

Raw File: TINY\_20110729\_FEP\_285\_PD2010720\_Ckx2\_mouseCerebellum\_LF\_ap2\_GTPyS  
Scan Number: 25078  
BiGX81:AKGCGI:061036B1:GX80:AKKGC5:AYKGC1:061036-2:GSE5884:O88843

ELINEIIVMR  
Score: 286 : 1341.769 m/z; 671.89178 m/z; 1.1256 ppm; MULT-MSMS

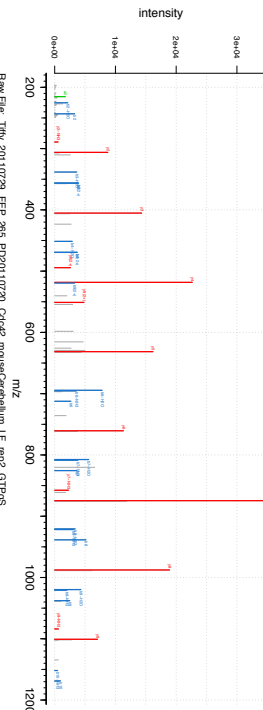

Raw File: TINY\_20110729\_FEP\_285\_PD2010720\_Ckx2\_mouseCerebellum\_LF\_ap2\_GTPyS  
Scan Number: 25078  
BiGX81:AKGCGI:061036B1:GX80:AKKGC5:AYKGC1:061036-2:GSE5884:O88843

ELINEIIVMR  
Score: 286 : 1341.769 m/z; 671.89178 m/z; 1.1256 ppm; MULT-MSMS

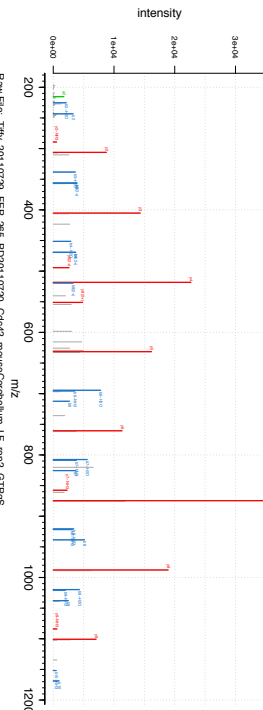

Raw File: TINY\_20110729\_FEP\_285\_PD2010720\_Ckx2\_mouseCerebellum\_LF\_ap2\_GTPyS  
Scan Number: 25078  
BiGX81:AKGCGI:061036B1:GX80:AKKGC5:AYKGC1:061036-2:GSE5884:O88843

ELINEIIVMR  
Score: 286 : 1341.769 m/z; 671.89178 m/z; 1.1256 ppm; MULT-MSMS

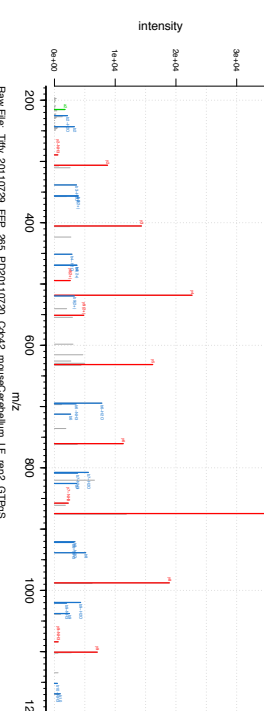

Raw File: TINY\_20110729\_FEP\_285\_PD2010720\_Ckx2\_mouseCerebellum\_LF\_ap2\_GTPyS  
Scan Number: 25078  
BiGX81:AKGCGI:061036B1:GX80:AKKGC5:AYKGC1:061036-2:GSE5884:O88843

ELINEIIVMR  
Score: 286 : 1341.769 m/z; 671.89178 m/z; 1.1256 ppm; MULT-MSMS

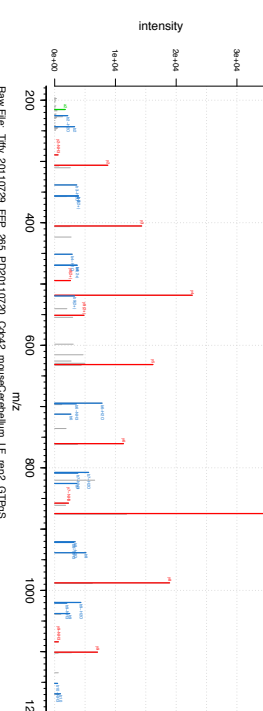

Raw File: TINY\_20110729\_FEP\_285\_PD2010720\_Ckx2\_mouseCerebellum\_LF\_ap2\_GTPyS  
Scan Number: 25078  
BiGX81:AKGCGI:061036B1:GX80:AKKGC5:AYKGC1:061036-2:GSE5884:O88843

ELINEIIVMR  
Score: 286 : 1341.769 m/z; 671.89178 m/z; 1.1256 ppm; MULT-MSMS

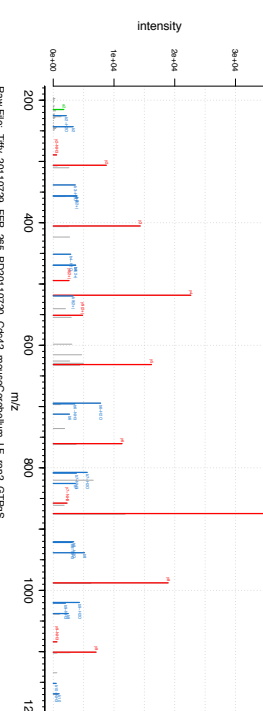

Raw File: TINY\_20110729\_FEP\_285\_PD2010720\_Ckx2\_mouseCerebellum\_LF\_ap2\_GTPyS  
Scan Number: 25078  
BiGX81:AKGCGI:061036B1:GX80:AKKGC5:AYKGC1:061036-2:GSE5884:O88843

LLOTSNIITK  
Score: 202 : 1016.5866 m/z: 509.30058 m/z: 0.43983 ppm: MULTI-MS/MS

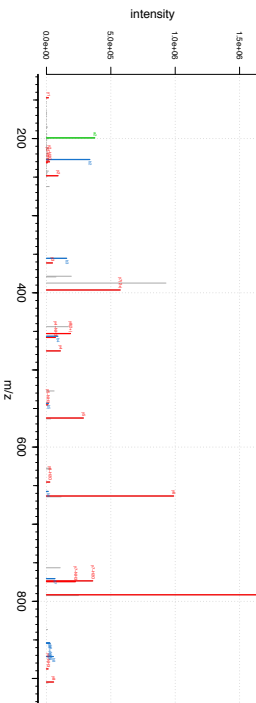

Raw File: TMy\_20110729\_FEP\_285\_PD20110720\_Ck42\_mouseCerebellum\_LF\_rep2\_GTPyS  
Scan Number: 4184  
B10K81:AAKGC01:081088B1:GX80:AAKGC5:AAKGC4:AAKGC1:081088-2:AAKGC3:081CN4:GE8B84:088843

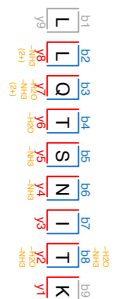

LLOTSNIITK  
Score: 202 : 1016.5866 m/z: 509.30058 m/z: 0.43983 ppm: MULTI-MS/MS

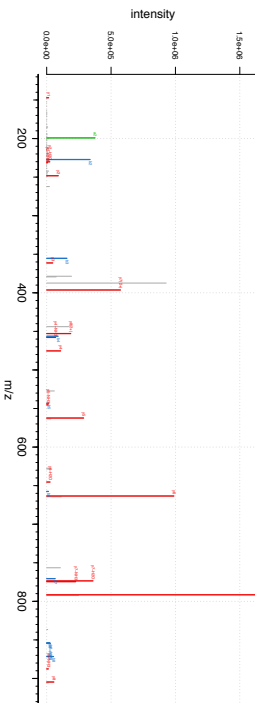

Raw File: TMy\_20110729\_FEP\_285\_PD20110720\_Ck42\_mouseCerebellum\_LF\_rep2\_GTPyS  
Scan Number: 4184  
B10K81:AAKGC01:081088B1:GX80:AAKGC5:AAKGC4:AAKGC1:081088-2:AAKGC3:081CN4:GE8B84:088843

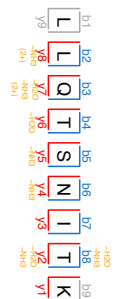

LLOTSNIITK  
Score: 202 : 1016.5866 m/z: 509.30058 m/z: 0.43983 ppm: MULTI-MS/MS

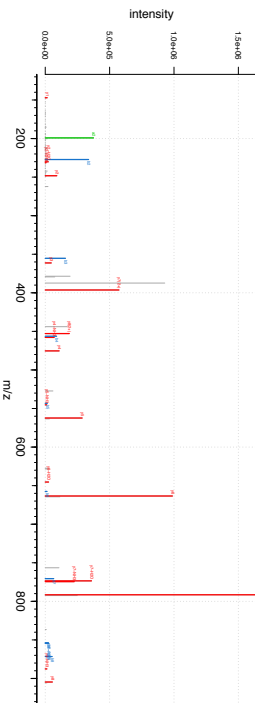

Raw File: TMy\_20110729\_FEP\_285\_PD20110720\_Ck42\_mouseCerebellum\_LF\_rep2\_GTPyS  
Scan Number: 4184  
B10K81:AAKGC01:081088B1:GX80:AAKGC5:AAKGC4:AAKGC1:081088-2:AAKGC3:081CN4:GE8B84:088843

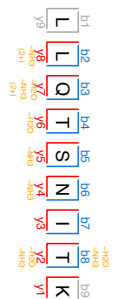

LLOTSNIITK  
Score: 202 : 1016.5866 m/z: 509.30058 m/z: 0.43983 ppm: MULTI-MS/MS

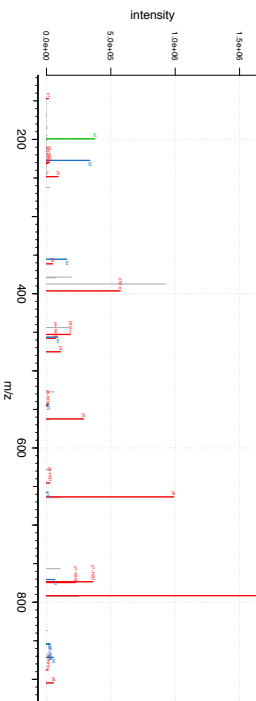

Raw File: TMy\_20110729\_FEP\_285\_PD20110720\_Ck42\_mouseCerebellum\_LF\_rep2\_GTPyS  
Scan Number: 4184  
B10K81:AAKGC01:081088B1:GX80:AAKGC5:AAKGC4:AAKGC1:081088-2:AAKGC3:081CN4:GE8B84:088843

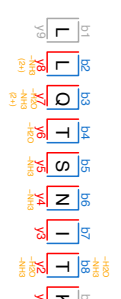

LLOTSNIITK  
Score: 202 : 1016.5866 m/z: 509.30058 m/z: 0.43983 ppm: MULTI-MS/MS

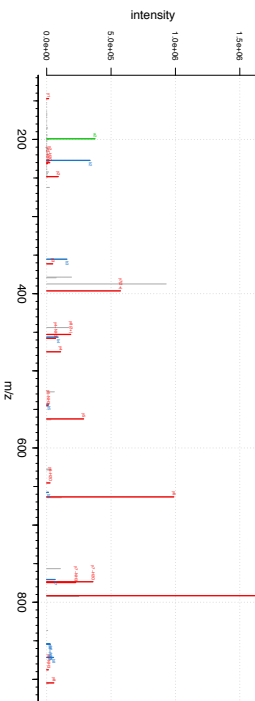

Raw File: TMy\_20110729\_FEP\_285\_PD20110720\_Ck42\_mouseCerebellum\_LF\_rep2\_GTPyS  
Scan Number: 4184  
B10K81:AAKGC01:081088B1:GX80:AAKGC5:AAKGC4:AAKGC1:081088-2:AAKGC3:081CN4:GE8B84:088843

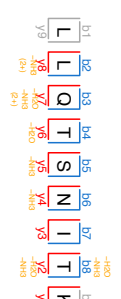

LLOTSNIITK  
Score: 202 : 1016.5866 m/z: 509.30058 m/z: 0.43983 ppm: MULTI-MS/MS

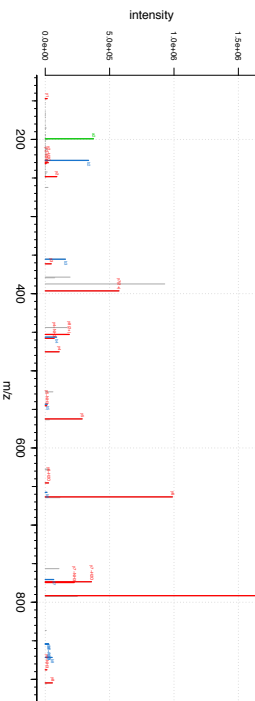

Raw File: TMy\_20110729\_FEP\_285\_PD20110720\_Ck42\_mouseCerebellum\_LF\_rep2\_GTPyS  
Scan Number: 4184  
B10K81:AAKGC01:081088B1:GX80:AAKGC5:AAKGC4:AAKGC1:081088-2:AAKGC3:081CN4:GE8B84:088843

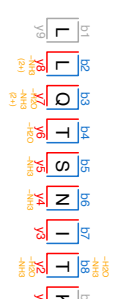

LLOTSNIITK  
Score: 202 : 1016.5866 m/z: 509.30058 m/z: 0.43983 ppm: MULTI-MS/MS

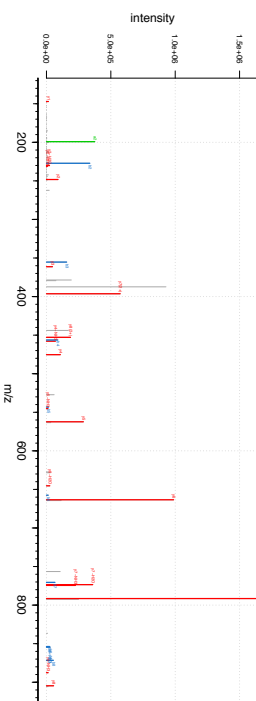

Raw File: TMy\_20110729\_FEP\_285\_PD20110720\_Ck42\_mouseCerebellum\_LF\_rep2\_GTPyS  
Scan Number: 4184  
B10K81:AAKGC01:081088B1:GX80:AAKGC5:AAKGC4:AAKGC1:081088-2:AAKGC3:081CN4:GE8B84:088843

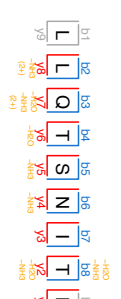

LLOTSNIITK  
Score: 202 : 1016.5866 m/z: 509.30058 m/z: 0.43983 ppm: MULTI-MS/MS

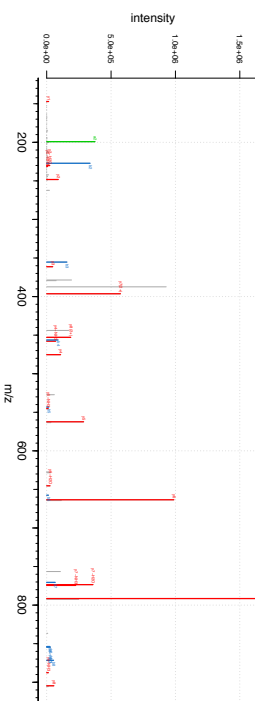

Raw File: TMy\_20110729\_FEP\_285\_PD20110720\_Ck42\_mouseCerebellum\_LF\_rep2\_GTPyS  
Scan Number: 4184  
B10K81:AAKGC01:081088B1:GX80:AAKGC5:AAKGC4:AAKGC1:081088-2:AAKGC3:081CN4:GE8B84:088843

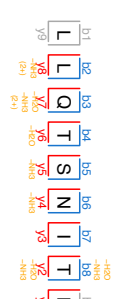

LLOTSNIITK  
Score: 202 : 1016.5866 m/z: 509.30058 m/z: 0.43983 ppm: MULTI-MS/MS

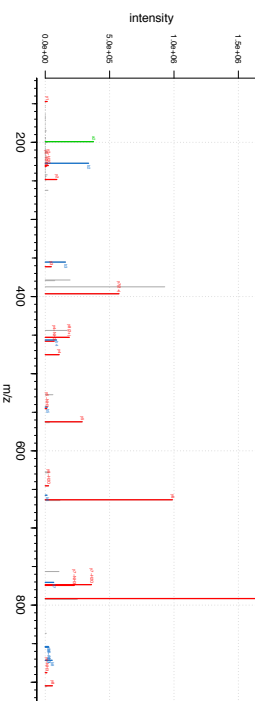

Raw File: TMy\_20110729\_FEP\_285\_PD20110720\_Ck42\_mouseCerebellum\_LF\_rep2\_GTPyS  
Scan Number: 4184  
B10K81:AAKGC01:081088B1:GX80:AAKGC5:AAKGC4:AAKGC1:081088-2:AAKGC3:081CN4:GE8B84:088843

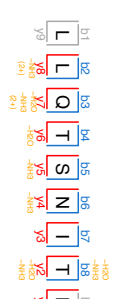

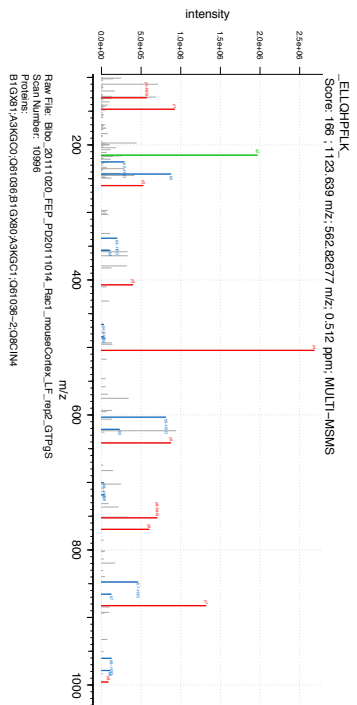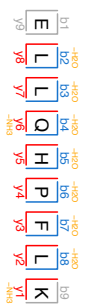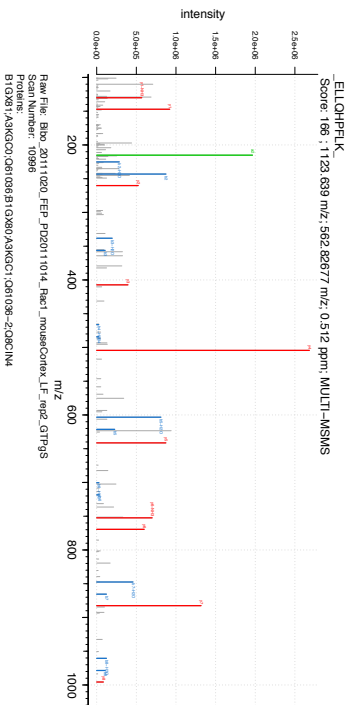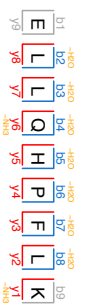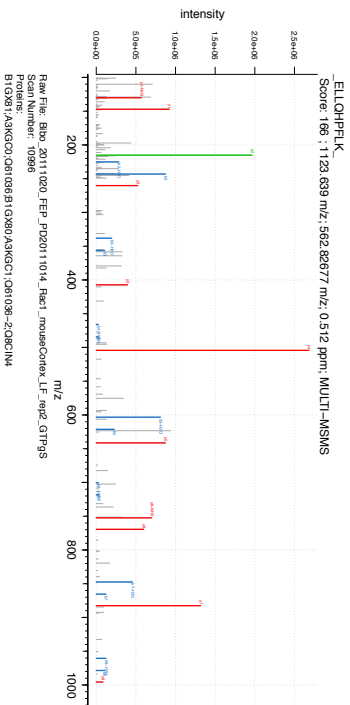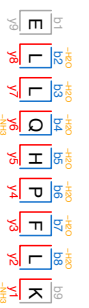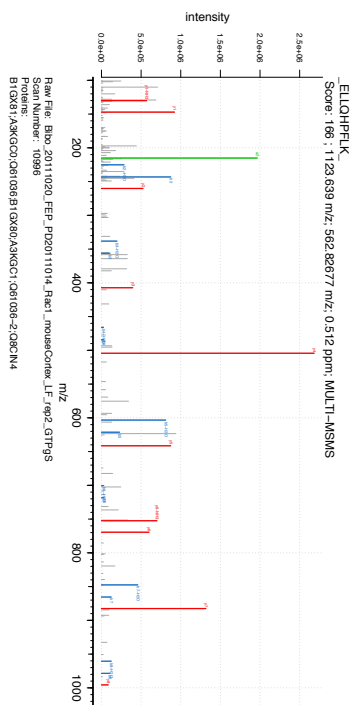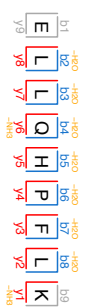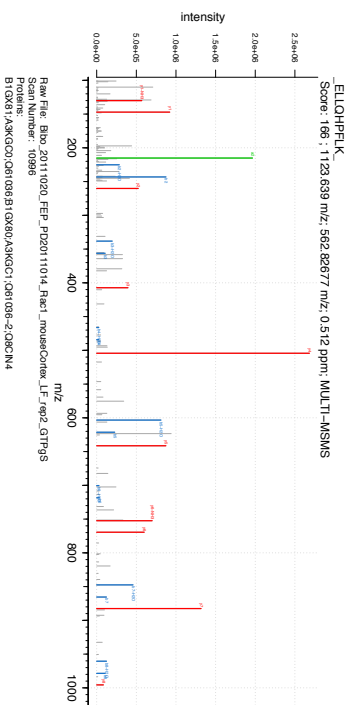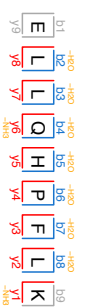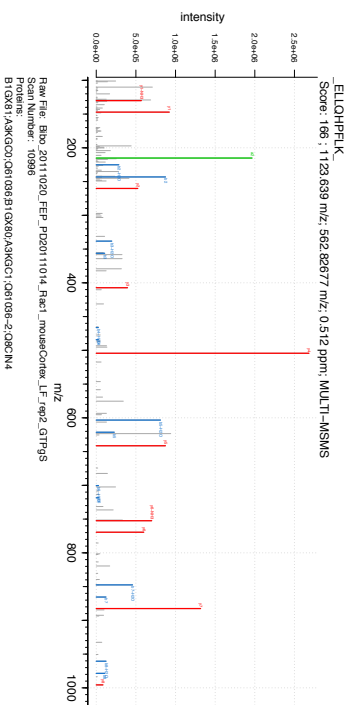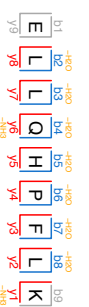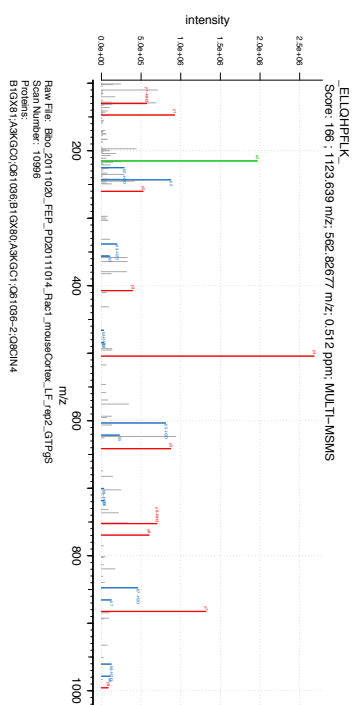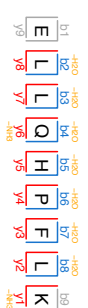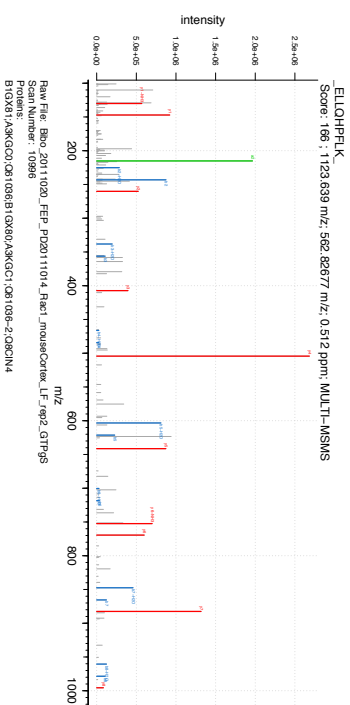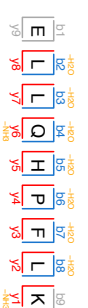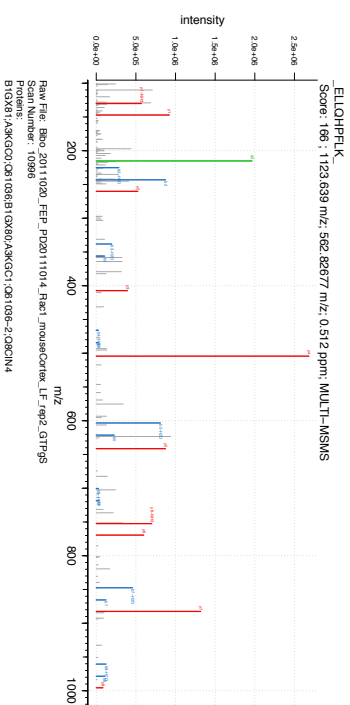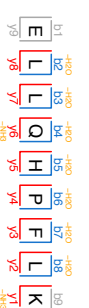



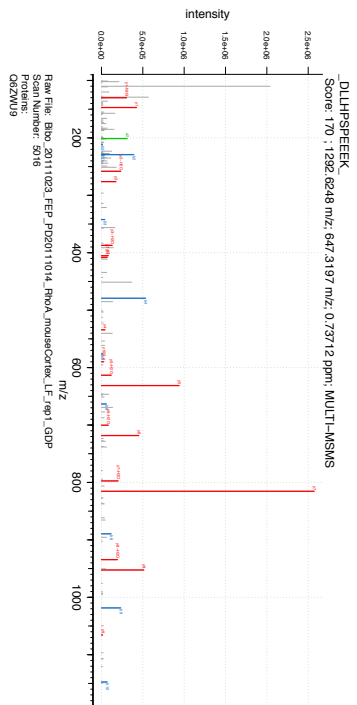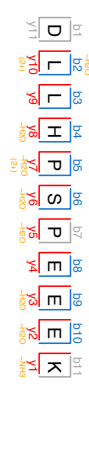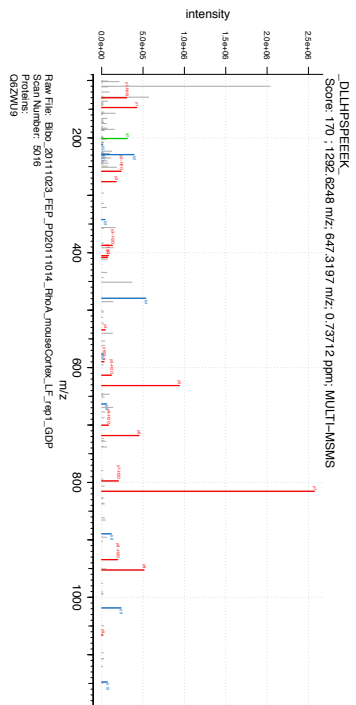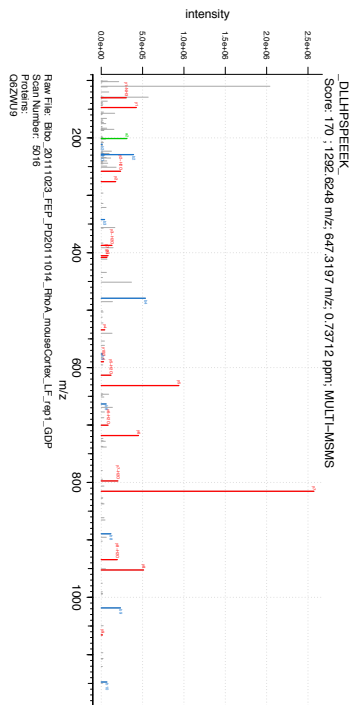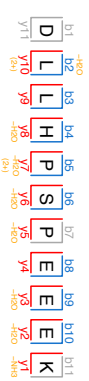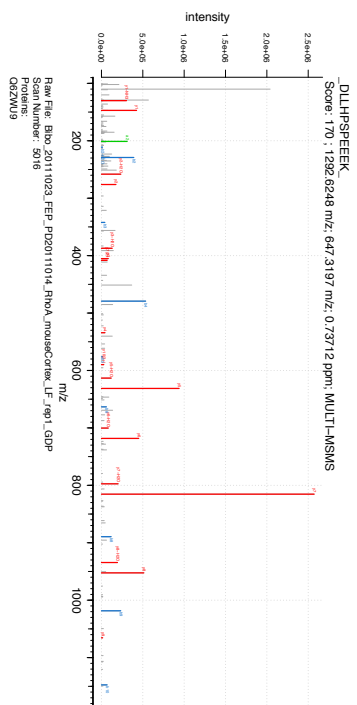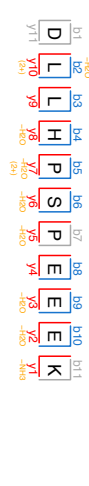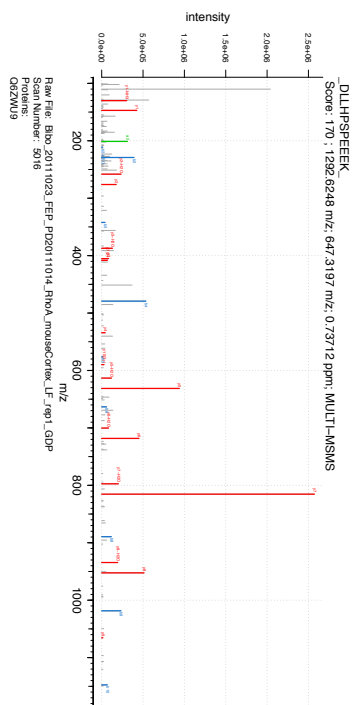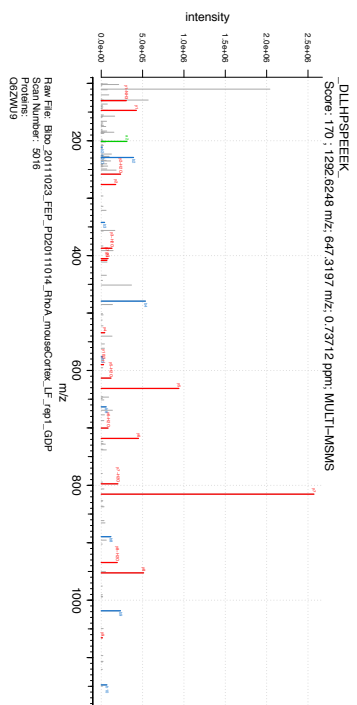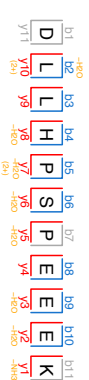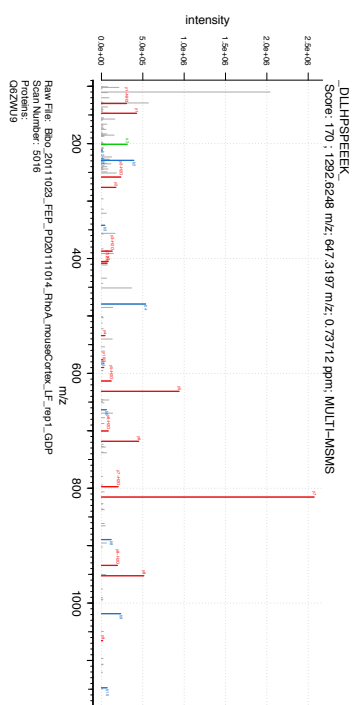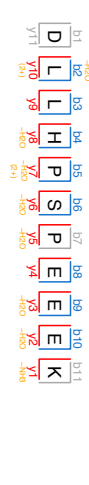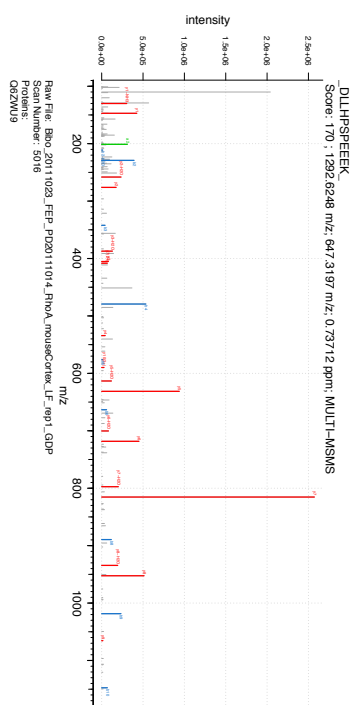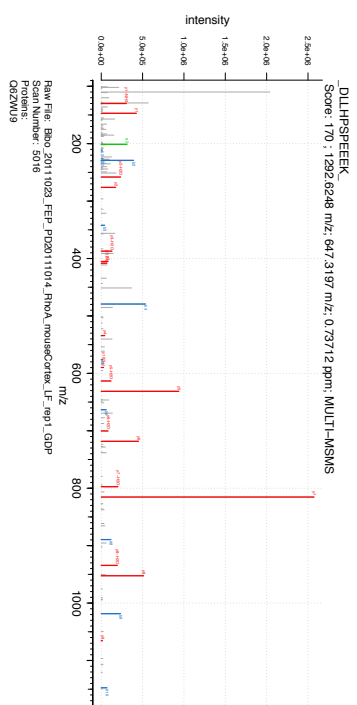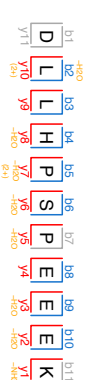

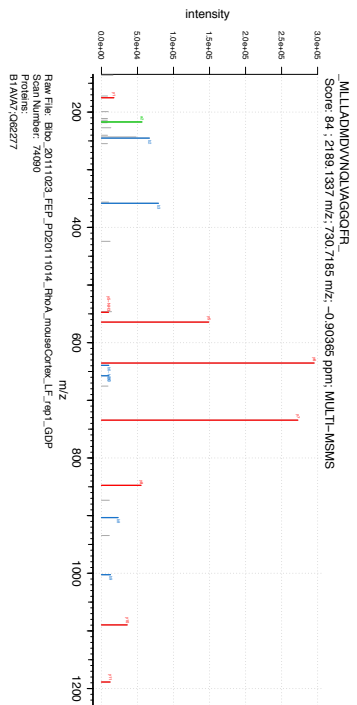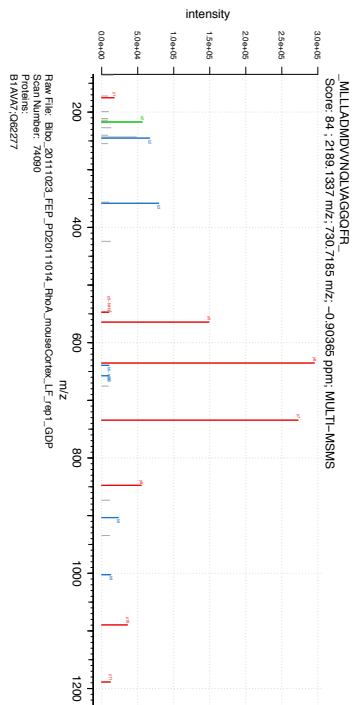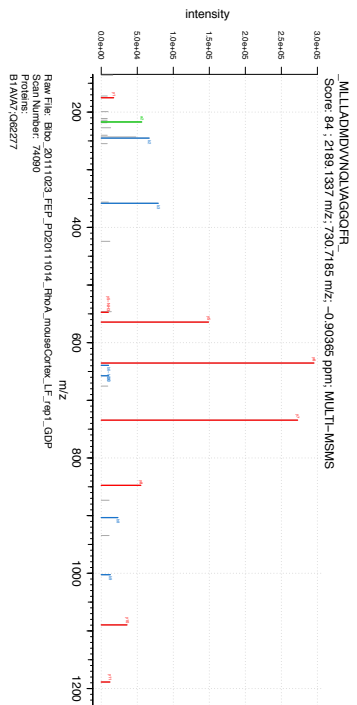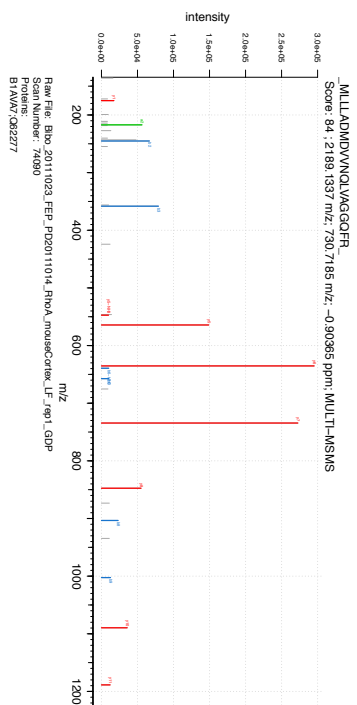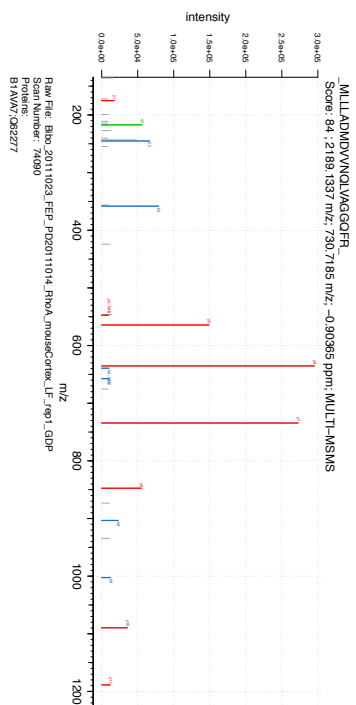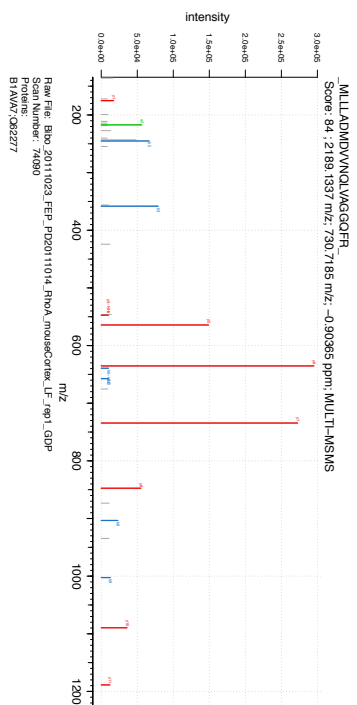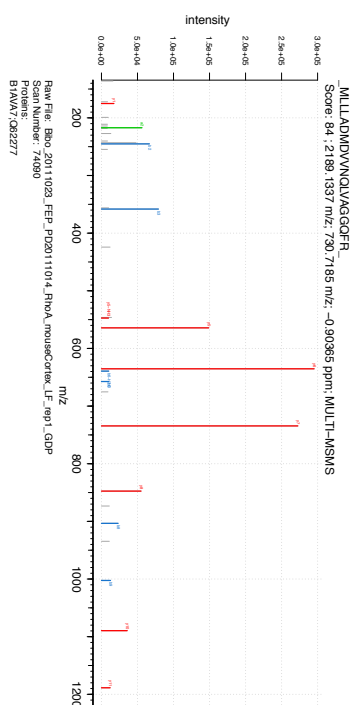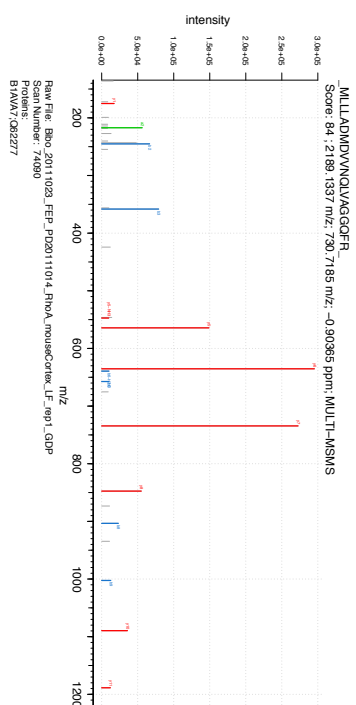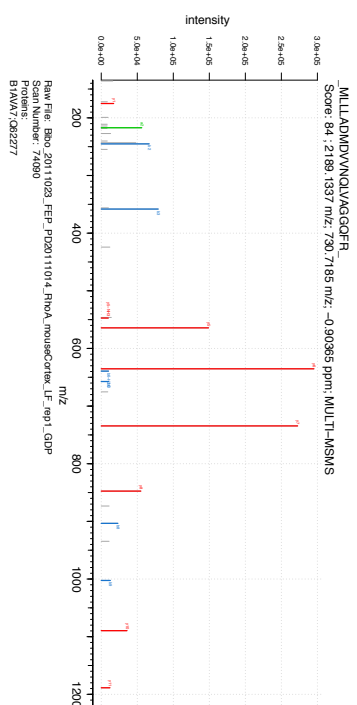

RIVOSPNSYFMDIK  
Score: 170 : 1682.845 m/z, 842.42979 m/z, -0.07078 ppm; MULTI-MS/MS

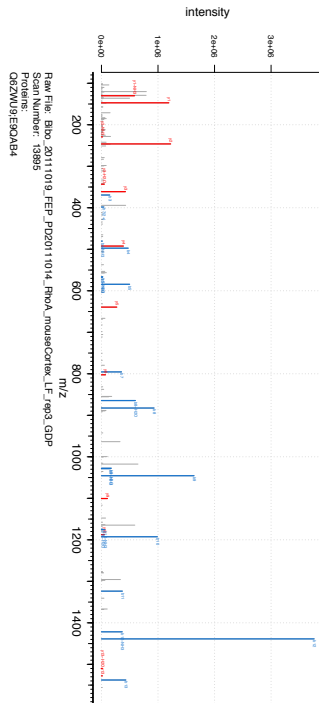

Raw File: Bto\_20111019\_FEP\_PD2011014\_Rhva\_mouseCereb\_LF\_4q3\_GDP  
Scan Number: 13895  
CRZWIUEQOAB4

RIVOSPNSYFMDIK  
Score: 170 : 1682.845 m/z, 842.42979 m/z, -0.07078 ppm; MULTI-MS/MS

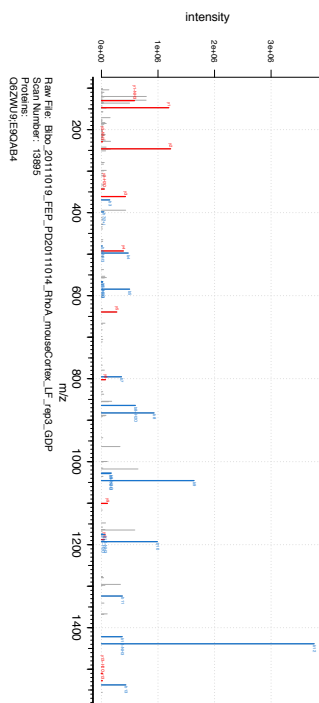

Raw File: Bto\_20111019\_FEP\_PD2011014\_Rhva\_mouseCereb\_LF\_4q3\_GDP  
Scan Number: 13895  
CRZWIUEQOAB4

RIVOSPNSYFMDIK  
Score: 170 : 1682.845 m/z, 842.42979 m/z, -0.07078 ppm; MULTI-MS/MS

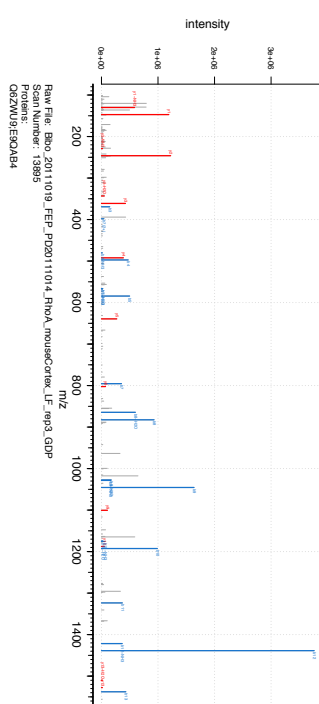

Raw File: Bto\_20111019\_FEP\_PD2011014\_Rhva\_mouseCereb\_LF\_4q3\_GDP  
Scan Number: 13895  
CRZWIUEQOAB4

RIVOSPNSYFMDIK  
Score: 170 : 1682.845 m/z, 842.42979 m/z, -0.07078 ppm; MULTI-MS/MS

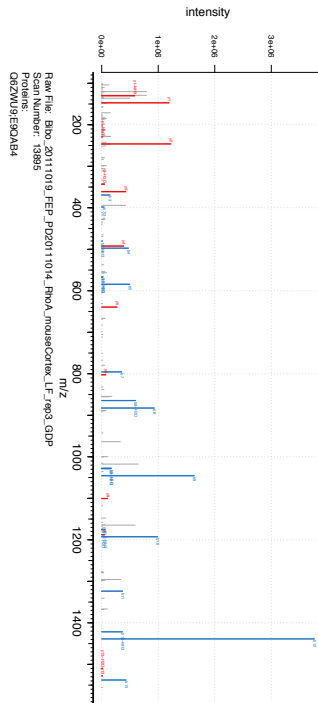

Raw File: Bto\_20111019\_FEP\_PD2011014\_Rhva\_mouseCereb\_LF\_4q3\_GDP  
Scan Number: 13895  
CRZWIUEQOAB4

RIVOSPNSYFMDIK  
Score: 170 : 1682.845 m/z, 842.42979 m/z, -0.07078 ppm; MULTI-MS/MS

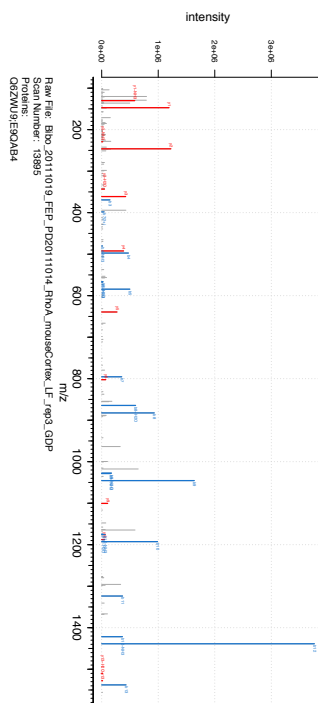

Raw File: Bto\_20111019\_FEP\_PD2011014\_Rhva\_mouseCereb\_LF\_4q3\_GDP  
Scan Number: 13895  
CRZWIUEQOAB4

RIVOSPNSYFMDIK  
Score: 170 : 1682.845 m/z, 842.42979 m/z, -0.07078 ppm; MULTI-MS/MS

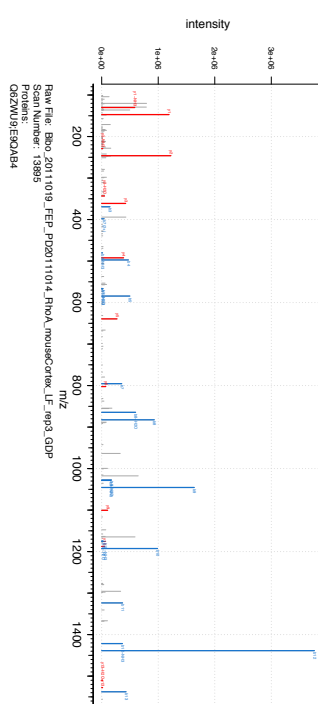

Raw File: Bto\_20111019\_FEP\_PD2011014\_Rhva\_mouseCereb\_LF\_4q3\_GDP  
Scan Number: 13895  
CRZWIUEQOAB4

RIVOSPNSYFMDIK  
Score: 170 : 1682.845 m/z, 842.42979 m/z, -0.07078 ppm; MULTI-MS/MS

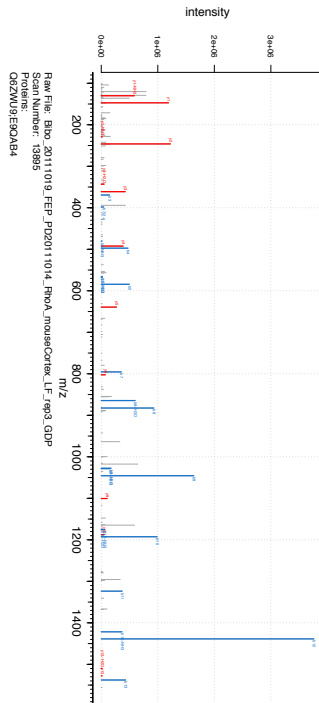

Raw File: Bto\_20111019\_FEP\_PD2011014\_Rhva\_mouseCereb\_LF\_4q3\_GDP  
Scan Number: 13895  
CRZWIUEQOAB4

RIVOSPNSYFMDIK  
Score: 170 : 1682.845 m/z, 842.42979 m/z, -0.07078 ppm; MULTI-MS/MS

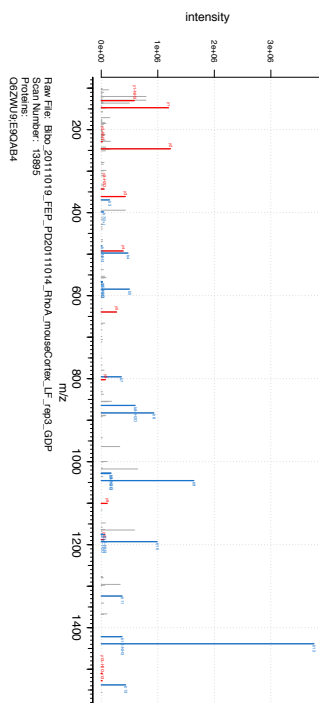

Raw File: Bto\_20111019\_FEP\_PD2011014\_Rhva\_mouseCereb\_LF\_4q3\_GDP  
Scan Number: 13895  
CRZWIUEQOAB4

RIVOSPNSYFMDIK  
Score: 170 : 1682.845 m/z, 842.42979 m/z, -0.07078 ppm; MULTI-MS/MS

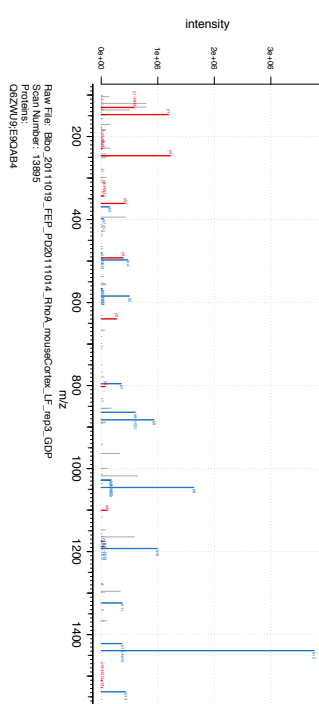

Raw File: Bto\_20111019\_FEP\_PD2011014\_Rhva\_mouseCereb\_LF\_4q3\_GDP  
Scan Number: 13895  
CRZWIUEQOAB4

R L V Q S P N S Y F M D V K  
D1 D2 D3 D4 D5 D6 D7 D8 D9 D10 D11 D12 D13 D14  
Y14 Y13 Y12 Y11 Y10 Y9 Y8 Y7 Y6 Y5 Y4 Y3 Y2 Y1

R L V Q S P N S Y F M D V K  
D1 D2 D3 D4 D5 D6 D7 D8 D9 D10 D11 D12 D13 D14  
Y14 Y13 Y12 Y11 Y10 Y9 Y8 Y7 Y6 Y5 Y4 Y3 Y2 Y1

R L V Q S P N S Y F M D V K  
D1 D2 D3 D4 D5 D6 D7 D8 D9 D10 D11 D12 D13 D14  
Y14 Y13 Y12 Y11 Y10 Y9 Y8 Y7 Y6 Y5 Y4 Y3 Y2 Y1



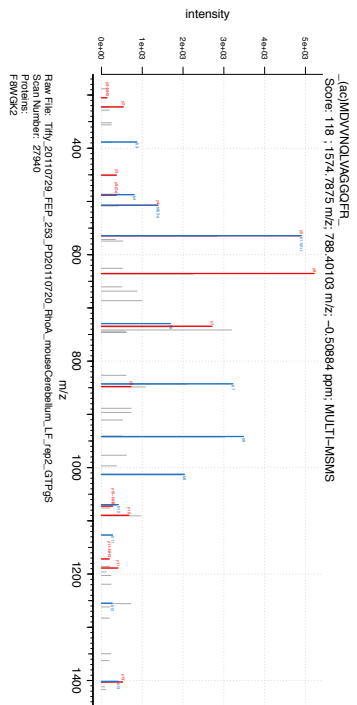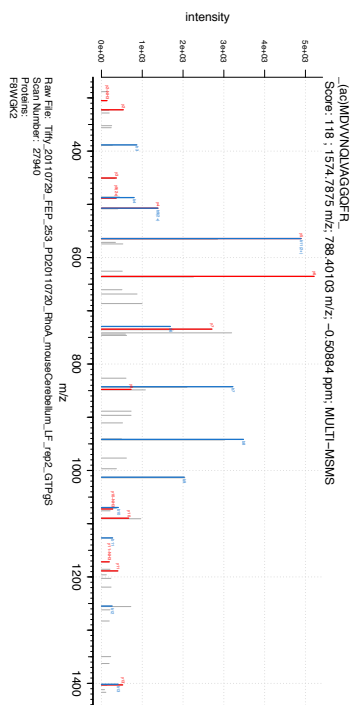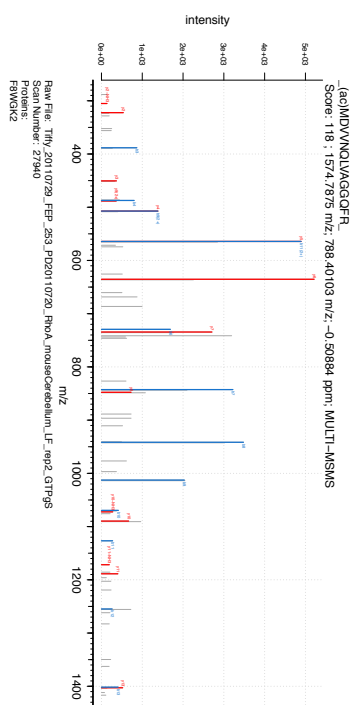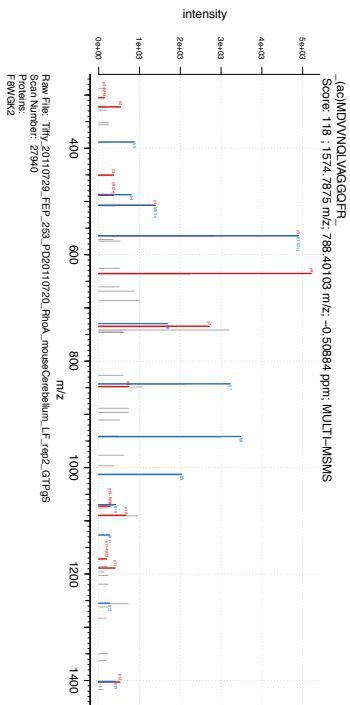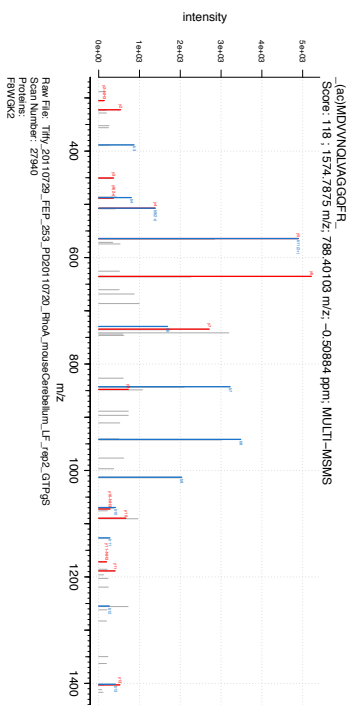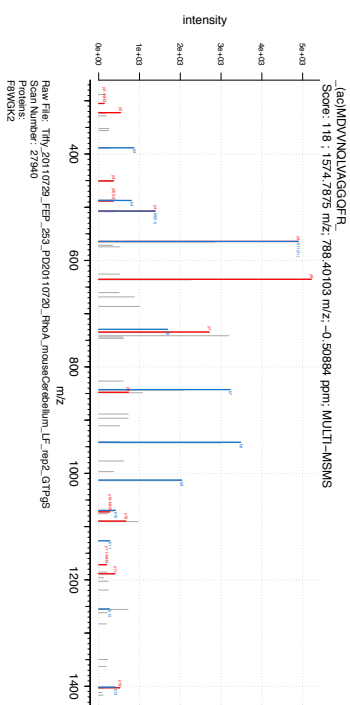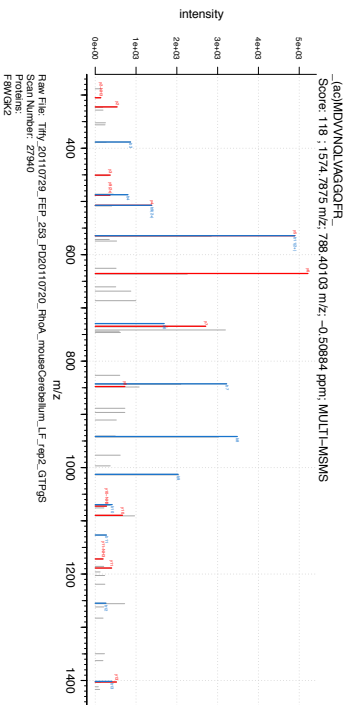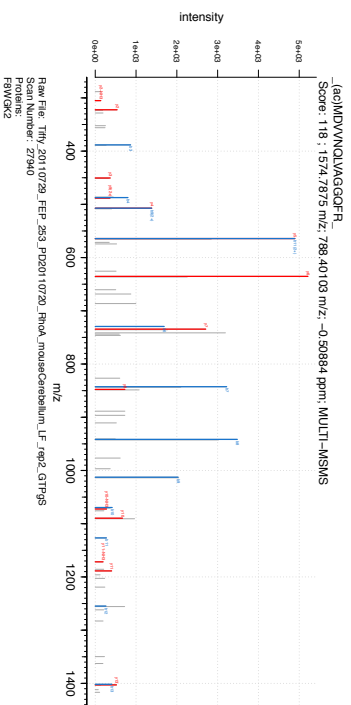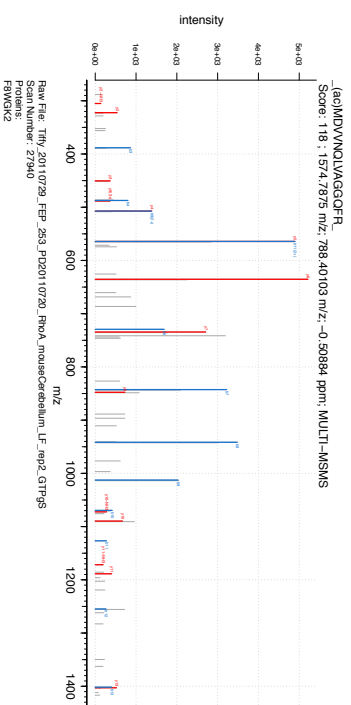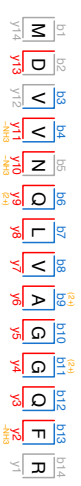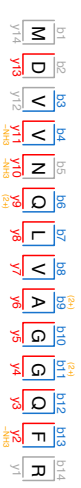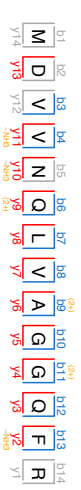



LREVSLEHEQKLEIK  
Score: 223 : 1979.0688 m/z: 495.77447 m/z: -1.7108 ppm; MULTI-MSMS

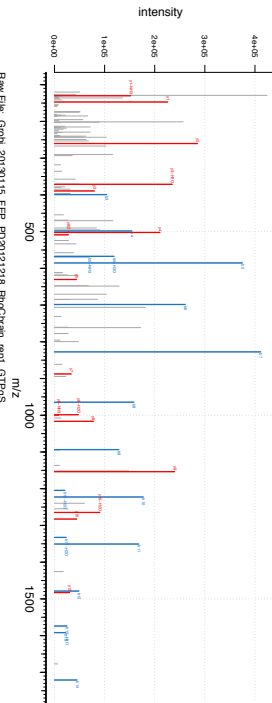

Raw File: Ge01\_20130115\_FEP\_PD20121218\_RhocChem\_rep1\_GTP9S  
Scan Number: 27091  
ECPV6:P49025-5D3VUB8EQLS:P49025-3:P49025-4

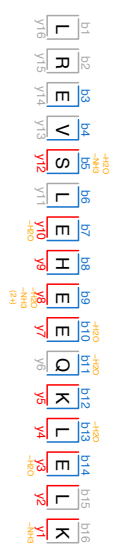

LREVSLEHEQKLEIK  
Score: 223 : 1979.0688 m/z: 495.77447 m/z: -1.7108 ppm; MULTI-MSMS

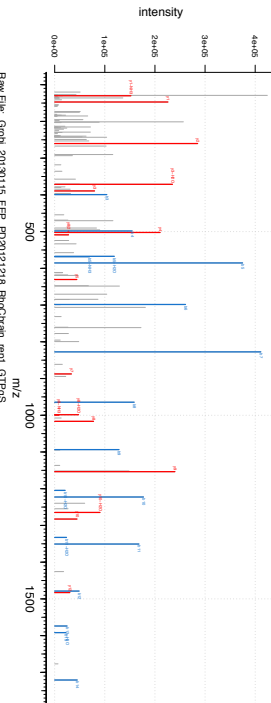

Raw File: Ge01\_20130115\_FEP\_PD20121218\_RhocChem\_rep1\_GTP9S  
Scan Number: 27091  
ECPV6:P49025-5D3VUB8EQLS:P49025-3:P49025-4

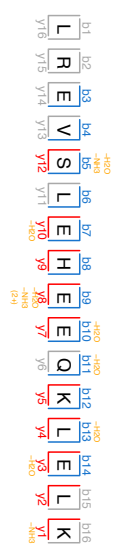

LREVSLEHEQKLEIK  
Score: 223 : 1979.0688 m/z: 495.77447 m/z: -1.7108 ppm; MULTI-MSMS

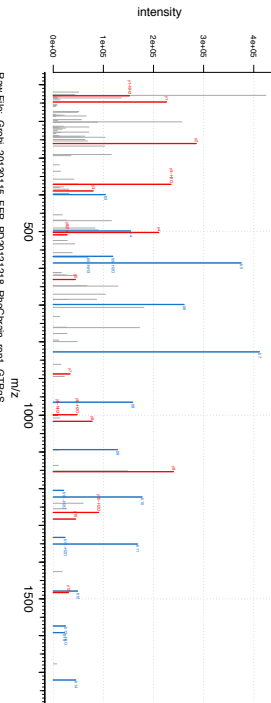

Raw File: Ge01\_20130115\_FEP\_PD20121218\_RhocChem\_rep1\_GTP9S  
Scan Number: 27091  
ECPV6:P49025-5D3VUB8EQLS:P49025-3:P49025-4

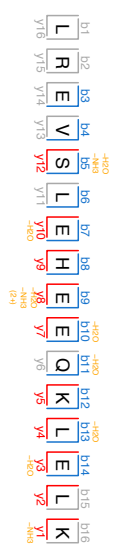

LREVSLEHEQKLEIK  
Score: 223 : 1979.0688 m/z: 495.77447 m/z: -1.7108 ppm; MULTI-MSMS

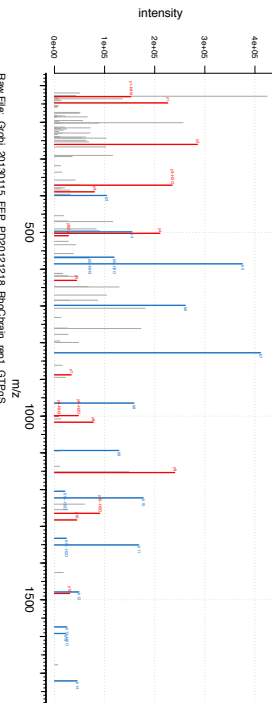

Raw File: Ge01\_20130115\_FEP\_PD20121218\_RhocChem\_rep1\_GTP9S  
Scan Number: 27091  
ECPV6:P49025-5D3VUB8EQLS:P49025-3:P49025-4

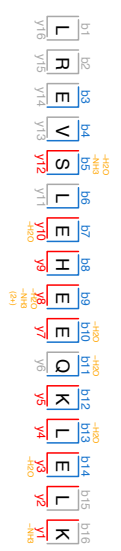

LREVSLEHEQKLEIK  
Score: 223 : 1979.0688 m/z: 495.77447 m/z: -1.7108 ppm; MULTI-MSMS

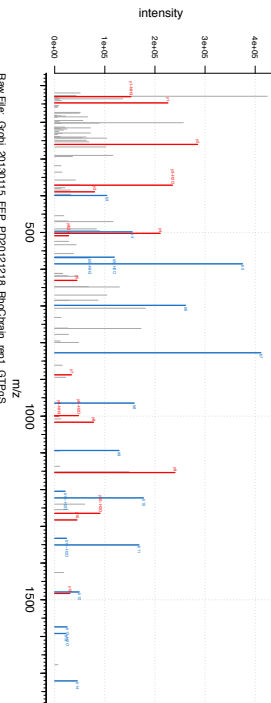

Raw File: Ge01\_20130115\_FEP\_PD20121218\_RhocChem\_rep1\_GTP9S  
Scan Number: 27091  
ECPV6:P49025-5D3VUB8EQLS:P49025-3:P49025-4

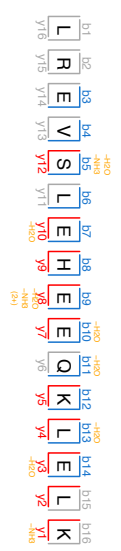

LREVSLEHEQKLEIK  
Score: 223 : 1979.0688 m/z: 495.77447 m/z: -1.7108 ppm; MULTI-MSMS

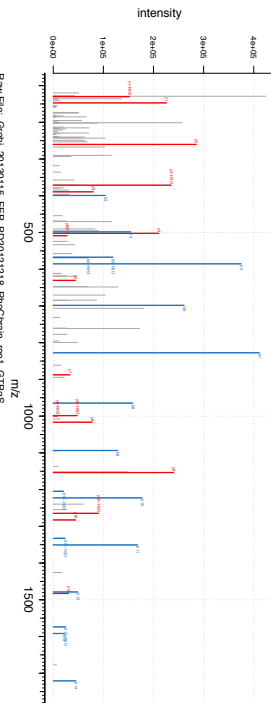

Raw File: Ge01\_20130115\_FEP\_PD20121218\_RhocChem\_rep1\_GTP9S  
Scan Number: 27091  
ECPV6:P49025-5D3VUB8EQLS:P49025-3:P49025-4

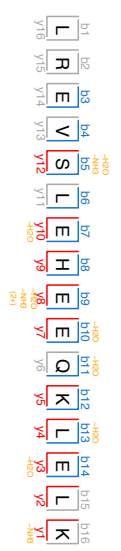

LREVSLEHEQKLEIK  
Score: 223 : 1979.0688 m/z: 495.77447 m/z: -1.7108 ppm; MULTI-MSMS

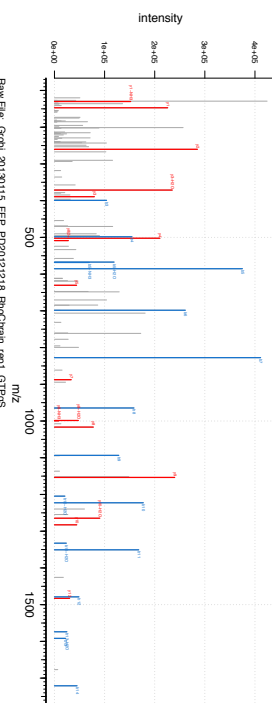

Raw File: Ge01\_20130115\_FEP\_PD20121218\_RhocChem\_rep1\_GTP9S  
Scan Number: 27091  
ECPV6:P49025-5D3VUB8EQLS:P49025-3:P49025-4

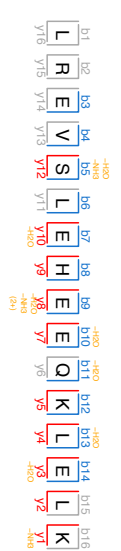

LREVSLEHEQKLEIK  
Score: 223 : 1979.0688 m/z: 495.77447 m/z: -1.7108 ppm; MULTI-MSMS

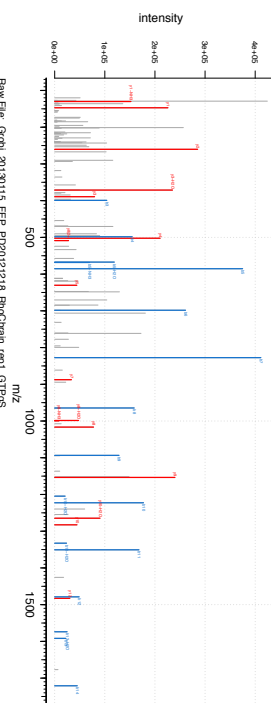

Raw File: Ge01\_20130115\_FEP\_PD20121218\_RhocChem\_rep1\_GTP9S  
Scan Number: 27091  
ECPV6:P49025-5D3VUB8EQLS:P49025-3:P49025-4

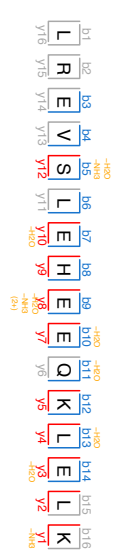

LREVSLEHEQKLEIK  
Score: 223 : 1979.0688 m/z: 495.77447 m/z: -1.7108 ppm; MULTI-MSMS

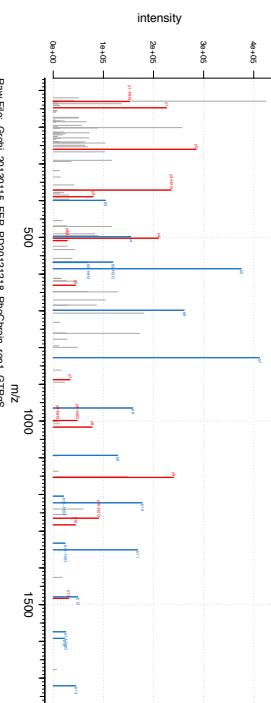

Raw File: Ge01\_20130115\_FEP\_PD20121218\_RhocChem\_rep1\_GTP9S  
Scan Number: 27091  
ECPV6:P49025-5D3VUB8EQLS:P49025-3:P49025-4

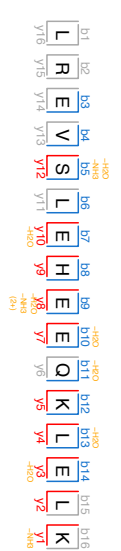

Supplement: 10.1074_M116.061531_mcp.M116.061531-1.pdf [file 10.1074_M116.061531_mcp.M116.061531-1.pdf]
