# Supplementary material
Source: PubMed Central journal article supplement (PMC5217783)
Supplement: 10.1074_M116.061531_mcp.M116.061531-5.pdf [file 10.1074_M116.061531_mcp.M116.061531-5.pdf]

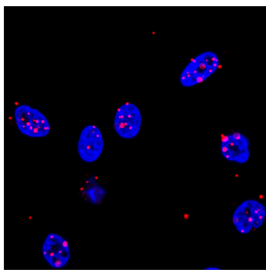

$\alpha$ RhoA +  $\alpha$ IQSEC3

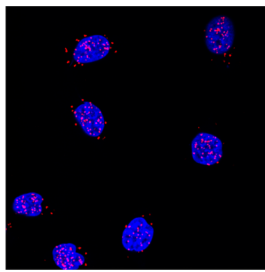

$\alpha$ RhoA +  $\alpha$ ACAT1

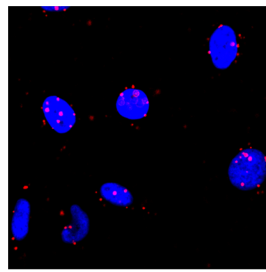

$\alpha$ Rac1 +  $\alpha$ SESTD1

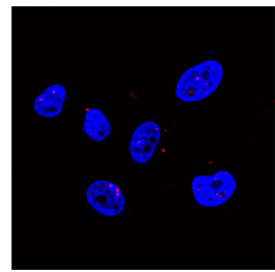

$\alpha$ Rac1 +  $\alpha$ Opa1

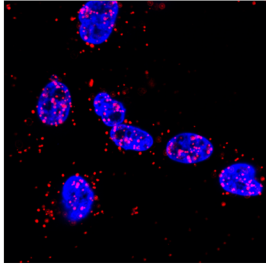

$\alpha$ RhoA +  $\alpha$ IQSEC3  
+CNF<sub>γ</sub>

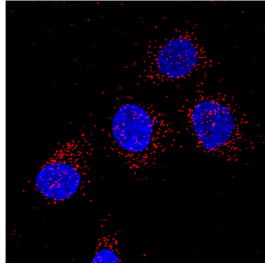

$\alpha$ RhoA +  $\alpha$ ACAT1  
+CNF<sub>γ</sub>

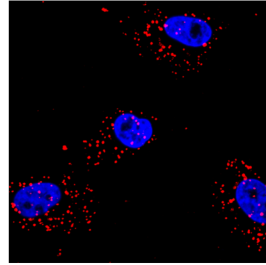

$\alpha$ Rac1 +  $\alpha$ SESTD1  
+CNF1

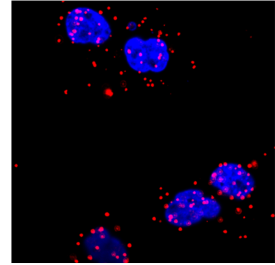

$\alpha$ Rac1 +  $\alpha$ Opa1  
+CNF1

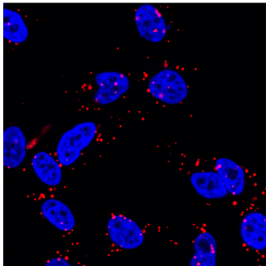

$\alpha$ Rac1 +  $\alpha$ Mzt1/2

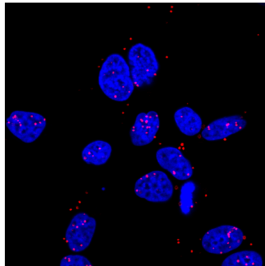

$\alpha$ Rac1 +  $\alpha$ IQSEC3

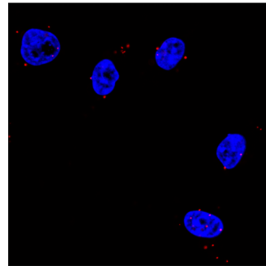

$\alpha$ Cdc42 +  $\alpha$ SESTD1

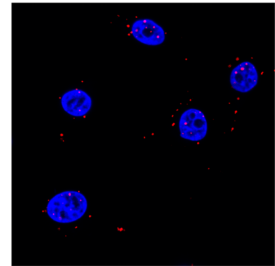

$\alpha$ Cdc42 +  $\alpha$ Rock2

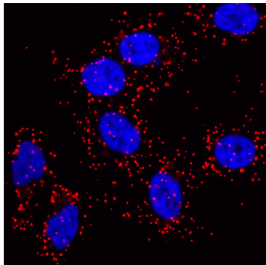

$\alpha$ Rac1 +  $\alpha$ Mzt1/2  
+CNF1

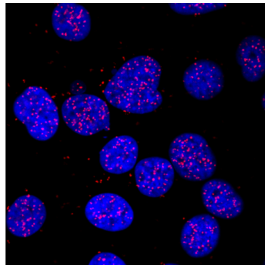

$\alpha$ Rac1 +  $\alpha$ IQSEC3  
+CNF1

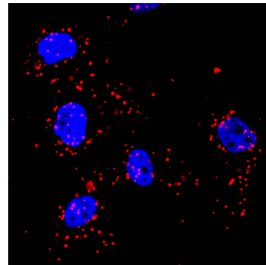

$\alpha$ Cdc42 +  $\alpha$ SESTD1  
+CNF1

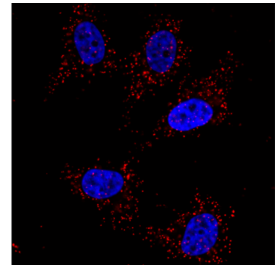

$\alpha$ Cdc42 +  $\alpha$ Rock2  
+CNF1

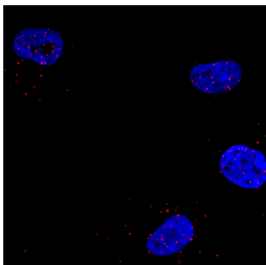

$\alpha$ Cdc42 +  $\alpha$ Opa1

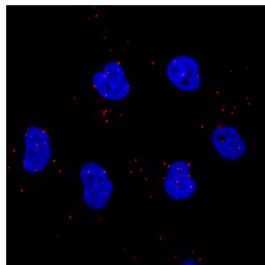

$\alpha$ Cdc42 +  $\alpha$ C10orf198

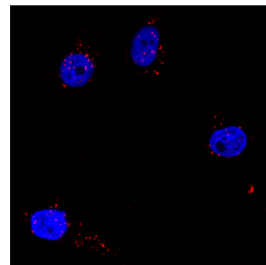

$\alpha$ Cdc42 +  $\alpha$ Mzt2a/b

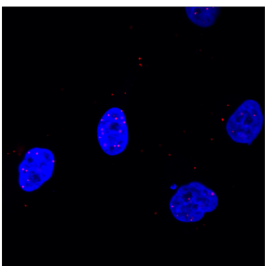

$\alpha$ Cdc42 +  $\alpha$ Opa1  
+CNF1

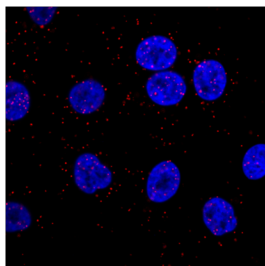

$\alpha$ Cdc42 +  $\alpha$ C10orf198  
+CNF1

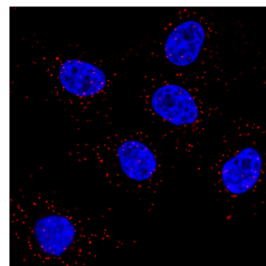

$\alpha$ Cdc42 +  $\alpha$ Mzt2a/b  
+CNF1
