# Supplementary material
Source: PubMed Central journal article supplement (PMC5217783)

**RhoA**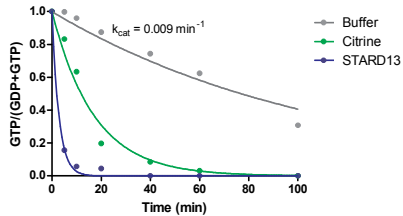**Cdc42**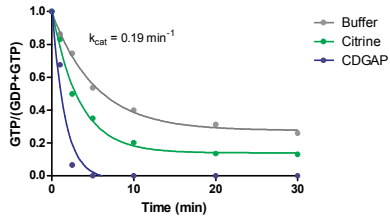**Rac1**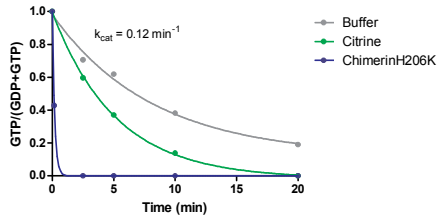

Supplement: 10.1074_M116.061531_mcp.M116.061531-3.pdf [file 10.1074_M116.061531_mcp.M116.061531-3.pdf]

**A**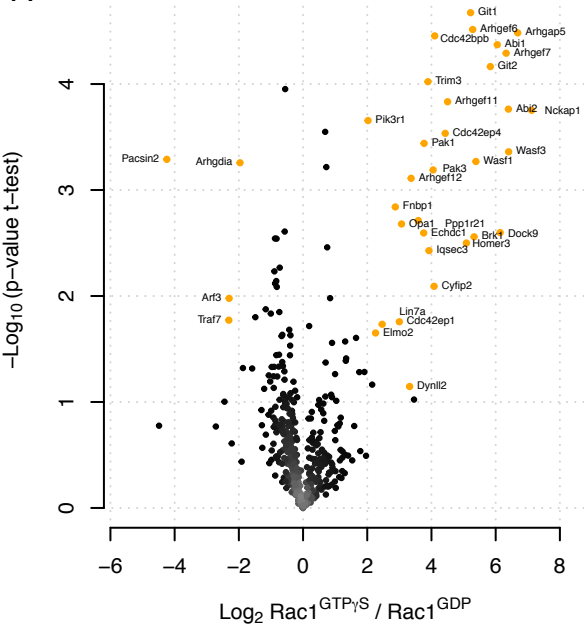**B**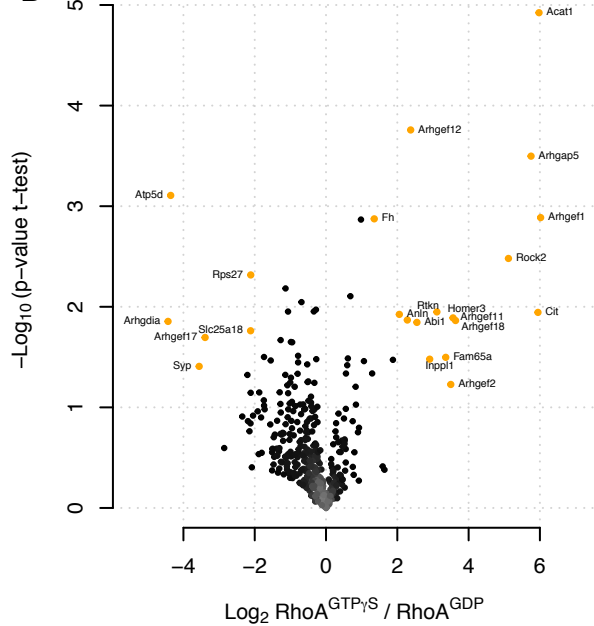**C**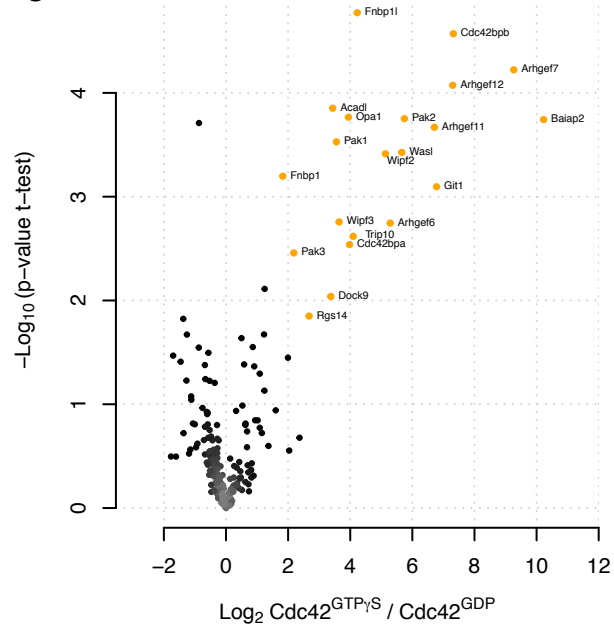

Supplement: 10.1074_M116.061531_mcp.M116.061531-4.pdf [file 10.1074_M116.061531_mcp.M116.061531-4.pdf]
